# Supplementary material for: Gene Loss Rather Than Gene Gain Is Associated with a Host Jump from Monocots to Dicots in the Smut Fungus Melanopsichium pennsylvanicum
Source: PubMed Central journal article supplement — Genome Biol Evol. 2014 Jul 24;6(8):2034–49. doi: 10.1093/gbe/evu148 (PMC4159001; doi:10.1093/gbe/evu148), 2014-07-24
Supplement: supp_evu148_Supplementary_Files_ALL_V2.pdf [file supp_evu148_Supplementary_Files_ALL_V2.pdf]

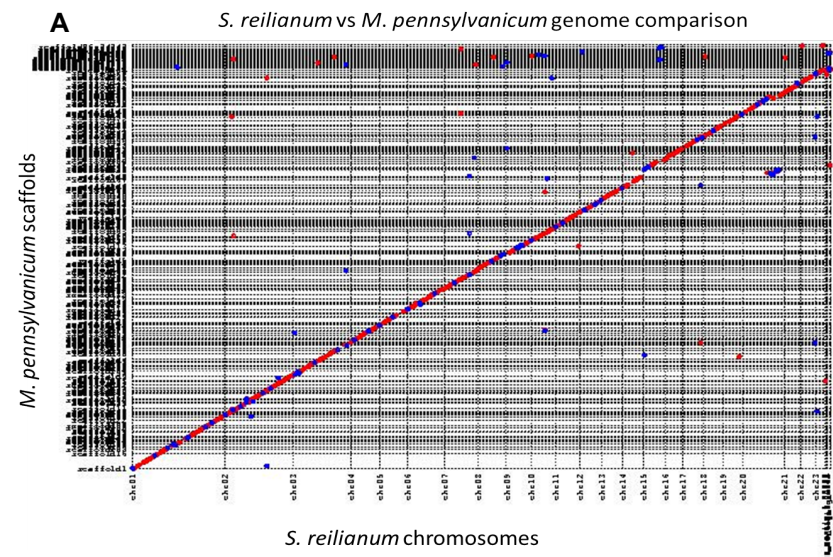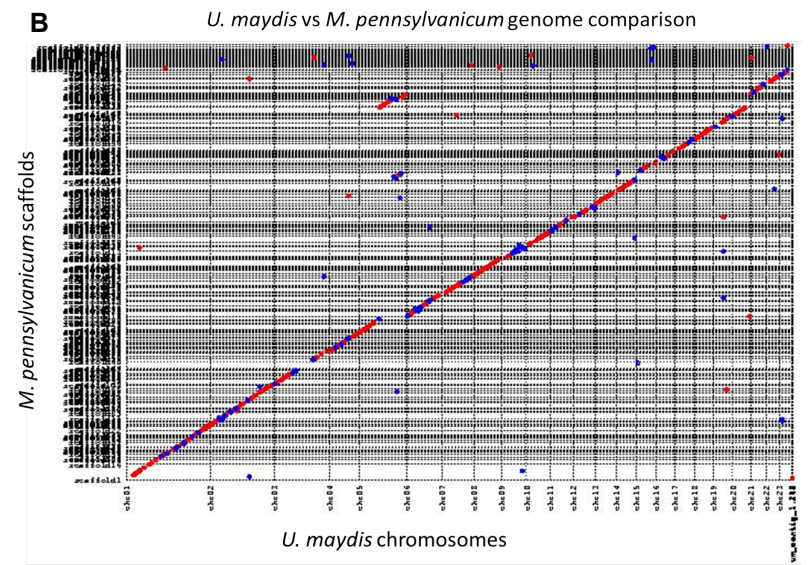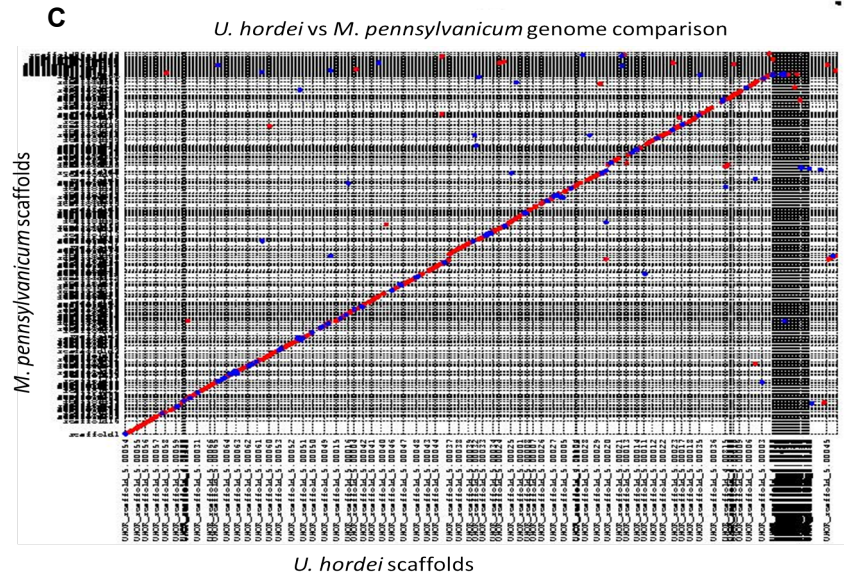

**Supplementary Figure 1:** Whole genome alignments of the *M. pennsylvanicum* genome with the other three genomes.

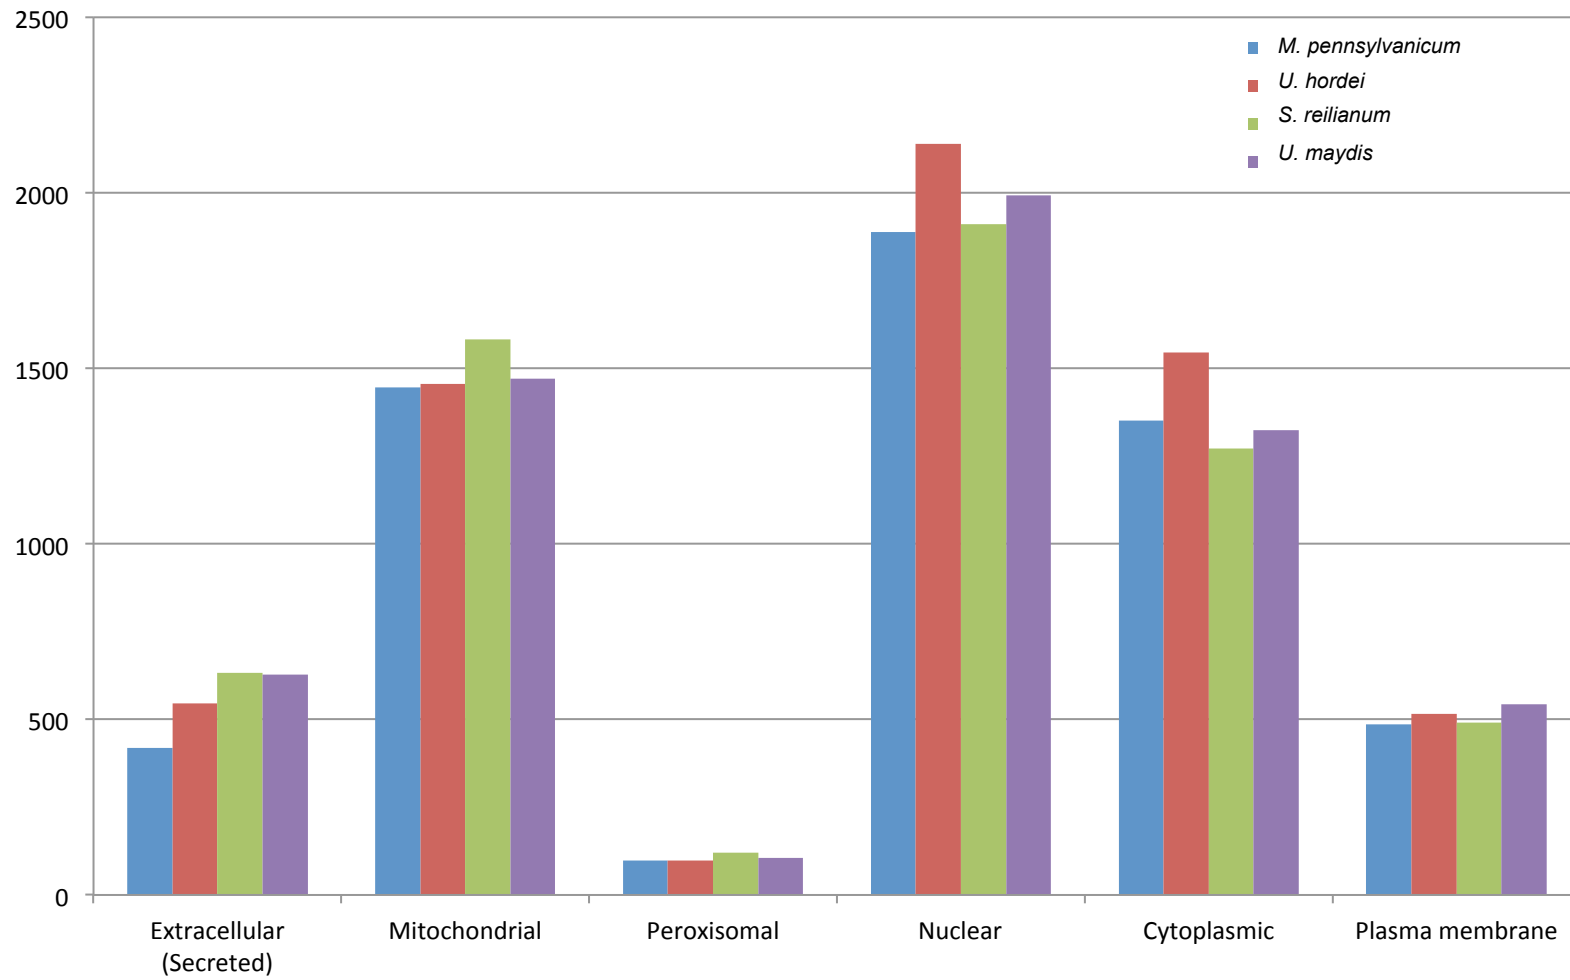

**Supplementary Figure 2:** Number of proteins targeted to certain subcellular organelles of the four smut genomes.

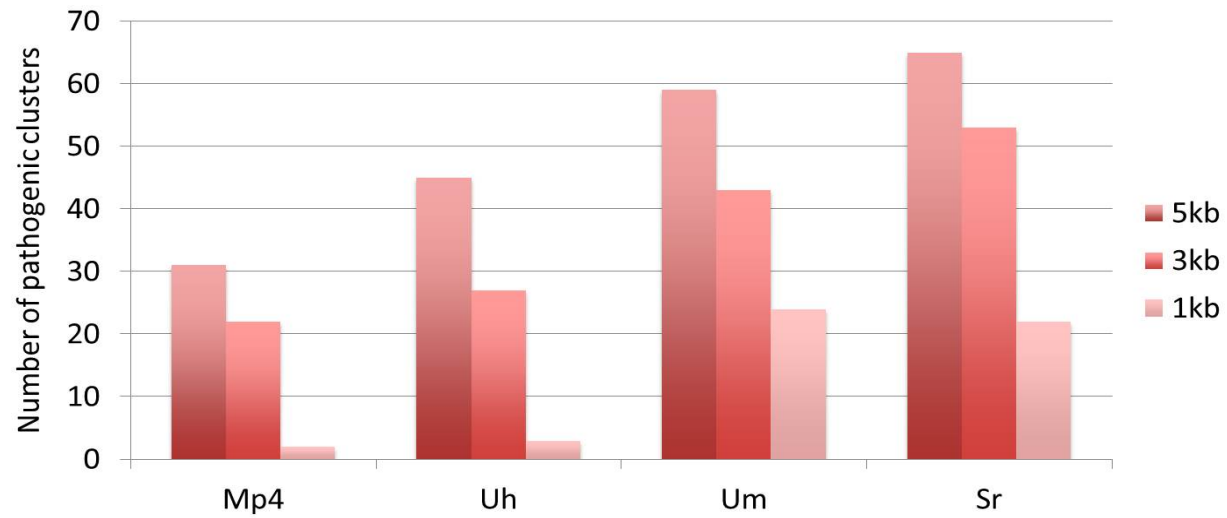

|                          | 5kb* | 3kb* | 1kb* |
|--------------------------|------|------|------|
| <i>M. pennsylvanicum</i> | 31   | 22   | 2    |
| <i>U. hordei</i>         | 45   | 27   | 3    |
| <i>U. maydis</i>         | 59   | 43   | 24   |
| <i>S. reilianum</i>      | 65   | 53   | 22   |

\*Number of candidate pathogenicity clusters detected using window of mentioned size

**Supplementary Figure 3:** Comparisons of different window lengths used for defining candidate pathogenicity clusters.

**A** *M. pennsylvanicum* proteins

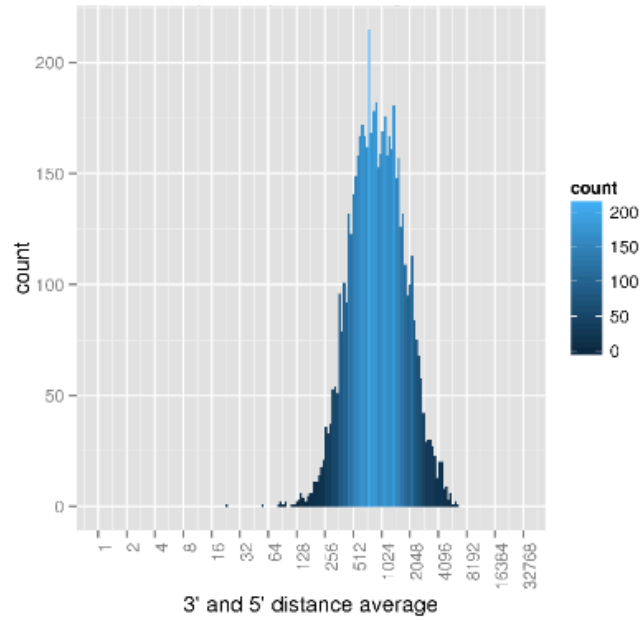

**B** *U. maydis* proteins

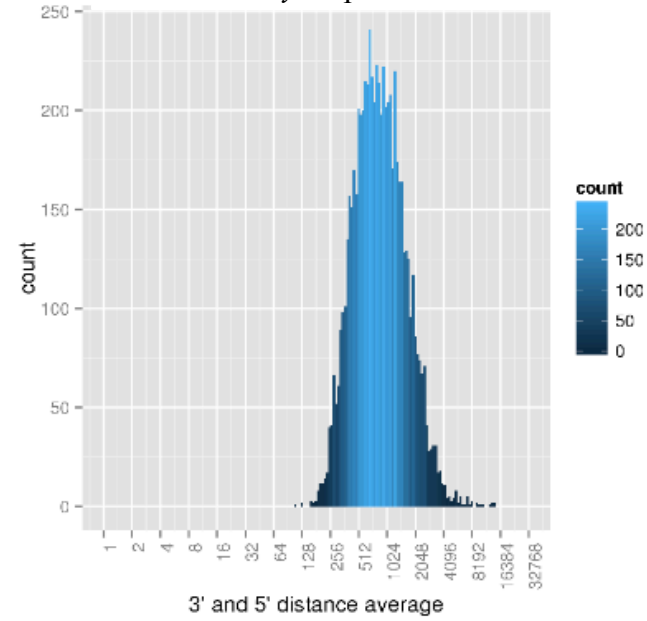

**C** *S. reilianum* proteins

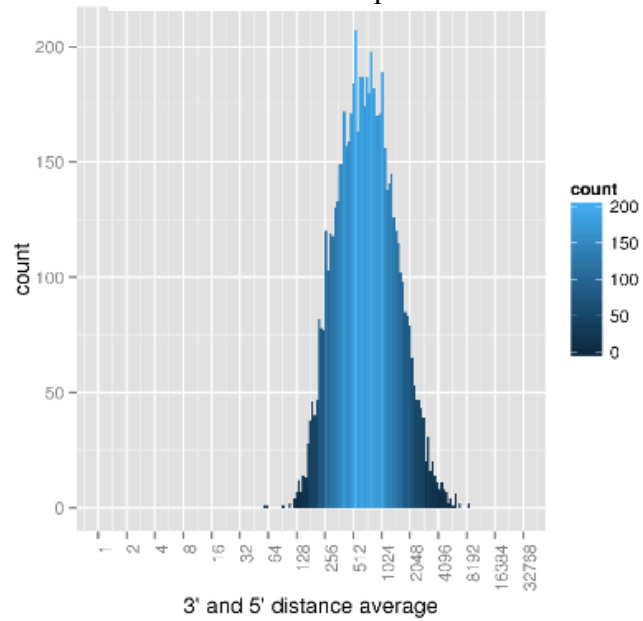

**D** *U. hordei* proteins

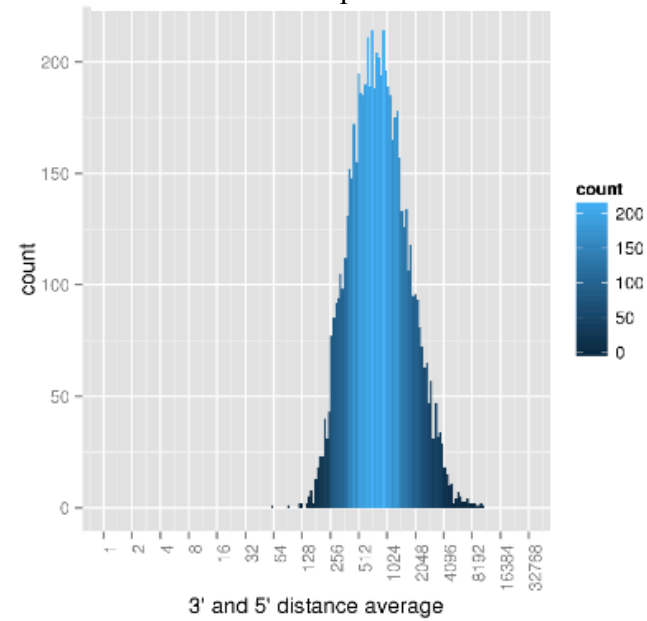

**E** *M. pennsylvanicum* secreted proteins

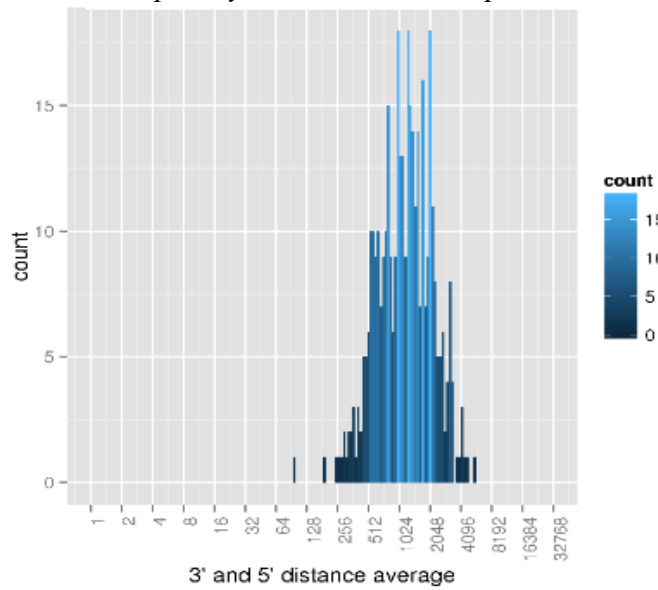

**F** *U. maydis* secreted proteins

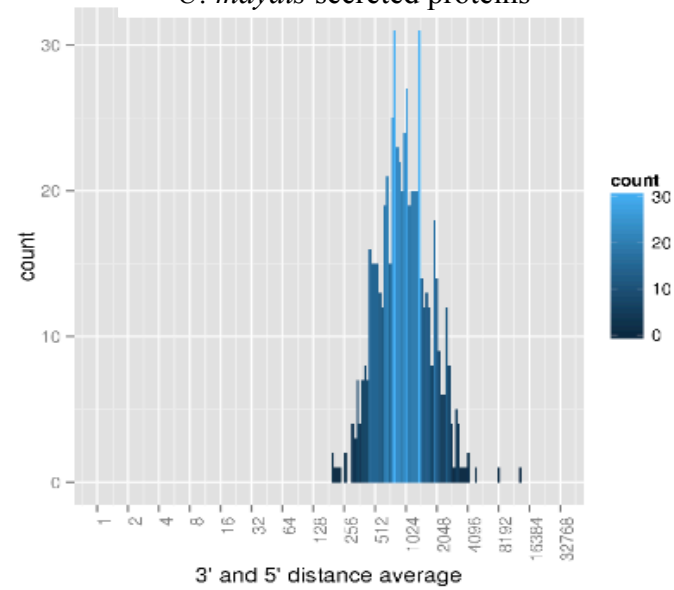

**G** *S. reilianum* secreted proteins

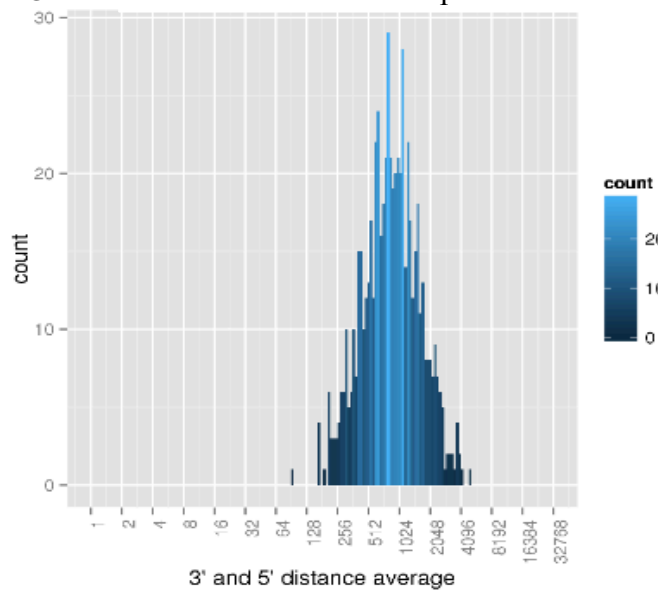

**H** *U. hordei* secreted proteins

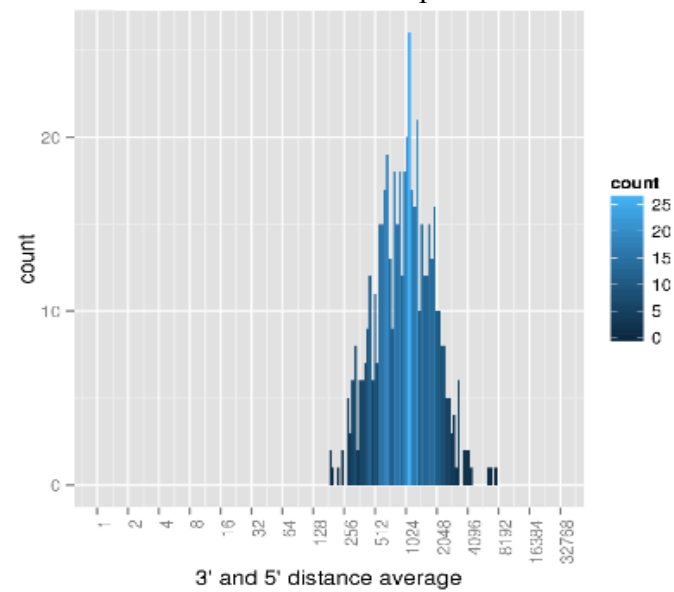

**Supplementary Figure 4:** Frequency plots of the average of the 5' and 3' end gene flanking regions.

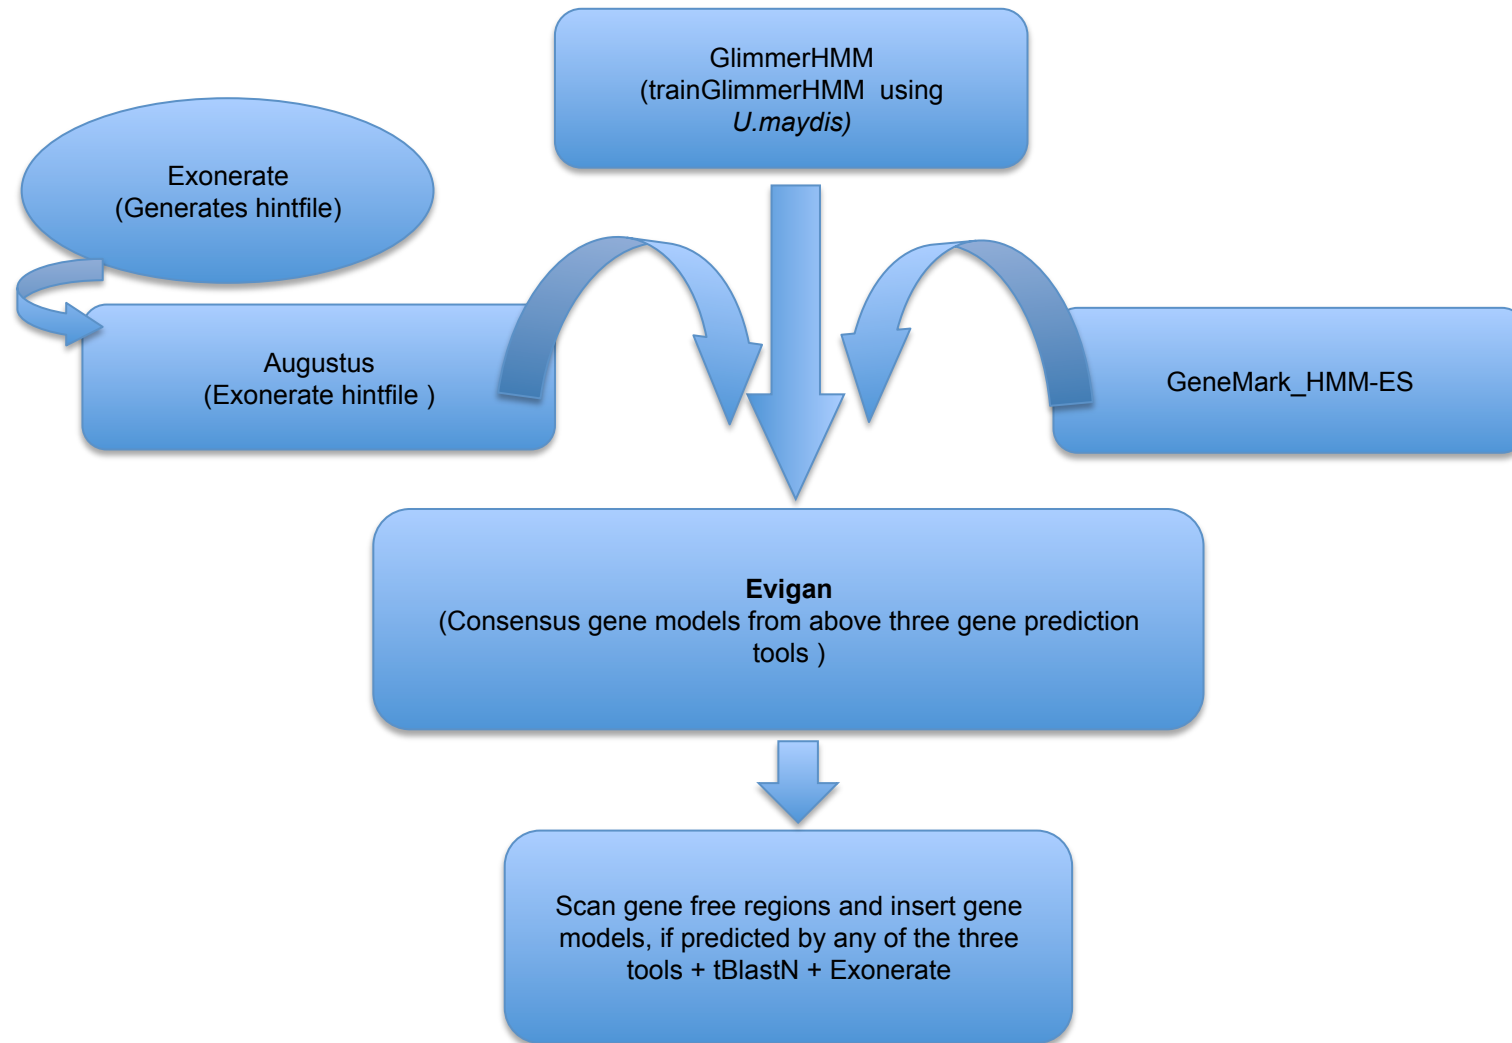

**Supplementary Figure 5:** Flowchart representing the *M. pennsylvanicum* gene prediction workflow.

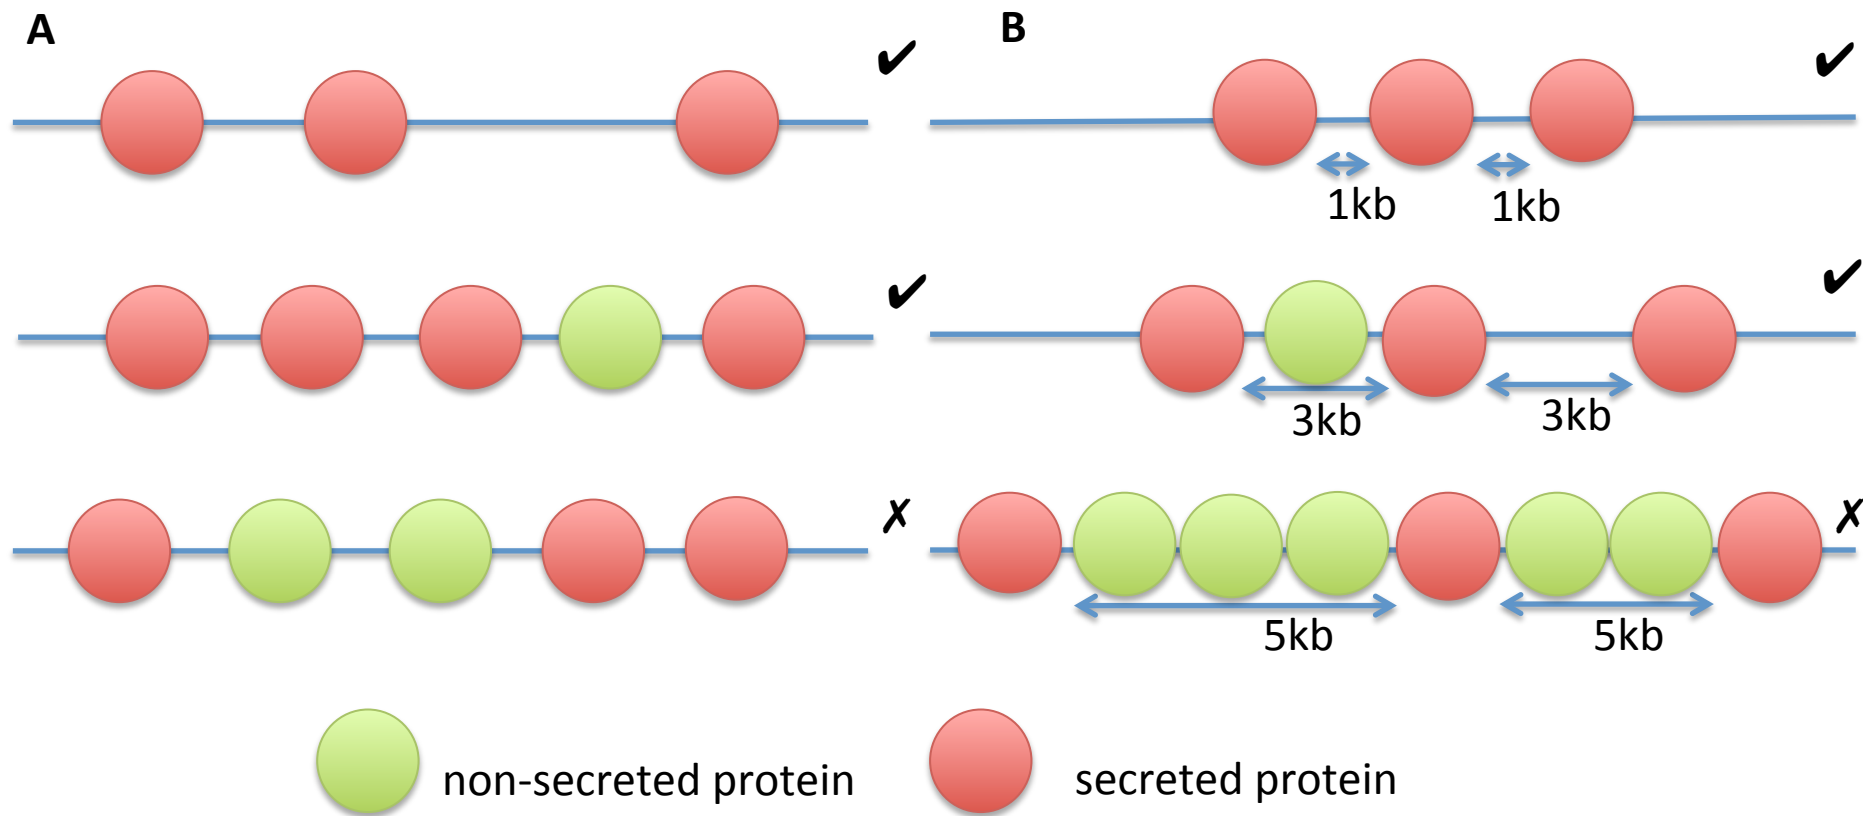

**Supplementary Figure 6:** Pathogenicity cluster definition using the ‘three direct neighbor’ and ‘3 kb distance’ approaches.



Supplementary Tables

Supplementary Table 1. The 292 genes absent in *M. pennsylvanicum*, but present in the other smut genomes.

|    | <i>U. maydis</i> gene id | Annotations                                                                        | Secreted/Non-Secreted |
|----|--------------------------|------------------------------------------------------------------------------------|-----------------------|
| 1  | um00210                  | conserved hypothetical protein                                                     | Non-Secreted          |
| 2  | um00222.2                | related to monocarboxylate transporter                                             | Non-Secreted          |
| 3  | um11606                  | putative protein                                                                   | Non-Secreted          |
| 4  | um00384                  | hypothetical protein                                                               | Non-Secreted          |
| 5  | um00478                  | hypothetical protein                                                               | Non-Secreted          |
| 6  | um00564                  | related to adenosine deaminase                                                     | Non-Secreted          |
| 7  | um00606                  | putative protein                                                                   | Non-Secreted          |
| 8  | um00616                  | putative protein                                                                   | Non-Secreted          |
| 9  | um00645                  | conserved hypothetical protein                                                     | Non-Secreted          |
| 10 | um11172                  | probable FEN2 - Pantothenate permease                                              | Non-Secreted          |
| 11 | um00771                  | hypothetical protein                                                               | Non-Secreted          |
| 12 | um00784.2                | putative protein                                                                   | Non-Secreted          |
| 13 | um00866                  | related to Endoglucanase                                                           | Non-Secreted          |
| 14 | um00928                  | putative protein                                                                   | Non-Secreted          |
| 15 | um15060                  | conserved hypothetical protein                                                     | Non-Secreted          |
| 16 | um11858                  | conserved hypothetical protein                                                     | Non-Secreted          |
| 17 | um01148                  | putative protein                                                                   | Non-Secreted          |
| 18 | um01179                  | putative protein                                                                   | Non-Secreted          |
| 19 | um12129.2                | related to Tubulin-specific chaperone A                                            | Non-Secreted          |
| 20 | um11337.2                | related to fumarylacetoacetate hydrolase                                           | Non-Secreted          |
| 21 | um01424                  | probable Cytochrome P450 monooxygenase/Phenylacetate hydroxylase                   | Non-Secreted          |
| 22 | um01425                  | probable homogentisate 1,2-dioxygenase                                             | Non-Secreted          |
| 23 | um12137                  | conserved hypothetical protein                                                     | Non-Secreted          |
| 24 | um01568                  | putative protein                                                                   | Non-Secreted          |
| 25 | um01665                  | hypothetical protein                                                               | Non-Secreted          |
| 26 | um01710                  | related to N-carbamoyl-L-amino acid hydrolase                                      | Non-Secreted          |
| 27 | um01716                  | conserved hypothetical protein                                                     | Non-Secreted          |
| 28 | um02214.2                | putative protein                                                                   | Non-Secreted          |
| 29 | um02222                  | related to membrane protein Dik6                                                   | Non-Secreted          |
| 30 | um02237                  | conserved hypothetical protein                                                     | Non-Secreted          |
| 31 | um02175                  | related to 3-phytase A precursor                                                   | Non-Secreted          |
| 32 | um02325.2                | conserved hypothetical protein                                                     | Non-Secreted          |
| 33 | um10168                  | conserved hypothetical protein                                                     | Non-Secreted          |
| 34 | um02529                  | conserved hypothetical protein                                                     | Non-Secreted          |
| 35 | um10301                  | hypothetical protein                                                               | Non-Secreted          |
| 36 | um02745                  | conserved hypothetical protein                                                     | Non-Secreted          |
| 37 | um02770                  | hypothetical protein                                                               | Non-Secreted          |
| 38 | um02774                  | related to alternative oxidase precursor, mitochondrial                            | Non-Secreted          |
| 39 | um02917                  | conserved hypothetical Ustilago-specific protein                                   | Non-Secreted          |
| 40 | um02974                  | related to AUT4 - breakdown of autophagic vesicles inside the vacuole              | Non-Secreted          |
| 41 | um03011                  | conserved hypothetical protein                                                     | Non-Secreted          |
| 42 | um10982                  | related to ribonucleoprotein                                                       | Non-Secreted          |
| 43 | um12228                  | putative protein                                                                   | Non-Secreted          |
| 44 | um03377                  | hypothetical protein                                                               | Non-Secreted          |
| 45 | um03424                  | conserved hypothetical protein                                                     | Non-Secreted          |
| 46 | um03522                  | related to UGA4 - GABA permease - also involved in delta-aminolevulinate transport | Non-Secreted          |
| 47 | um03575                  | putative protein                                                                   | Non-Secreted          |
| 48 | um03605                  | related to Sucrose-6-phosphate hydrolase                                           | Non-Secreted          |
| 49 | um03638                  | hypothetical protein                                                               | Non-Secreted          |
| 50 | um03652                  | conserved hypothetical protein                                                     | Non-Secreted          |
| 51 | um03857                  | conserved hypothetical protein                                                     | Non-Secreted          |
| 52 | um03906                  | hypothetical protein                                                               | Non-Secreted          |
| 53 | um04484                  | probable choline-sulfatase                                                         | Non-Secreted          |
| 54 | um12009                  | conserved hypothetical protein                                                     | Non-Secreted          |
| 55 | um12010                  | putative protein                                                                   | Non-Secreted          |
| 56 | um11768                  | hypothetical protein                                                               | Non-Secreted          |
| 57 | um10712                  | conserved hypothetical protein                                                     | Non-Secreted          |
| 58 | um10713.2                | conserved hypothetical protein                                                     | Non-Secreted          |
| 59 | um10714                  | conserved hypothetical protein                                                     | Non-Secreted          |
| 60 | um05649                  | conserved hypothetical protein                                                     | Non-Secreted          |
| 61 | um05789                  | conserved hypothetical protein                                                     | Non-Secreted          |
| 62 | um10851                  | conserved hypothetical protein                                                     | Non-Secreted          |
| 63 | um11575                  | conserved hypothetical protein                                                     | Non-Secreted          |
| 64 | um05593                  | hypothetical protein                                                               | Non-Secreted          |
| 65 | um05617                  | related to Lipase/esterase                                                         | Non-Secreted          |
| 66 | um05270                  | conserved hypothetical protein                                                     | Non-Secreted          |



|     |                  |                                                                           |              |
|-----|------------------|---------------------------------------------------------------------------|--------------|
| 67  | <b>um05272</b>   | conserved hypothetical protein                                            | Non-Secreted |
| 68  | <b>um05422</b>   | conserved hypothetical protein                                            | Non-Secreted |
| 69  | <b>um11190</b>   | putative protein                                                          | Non-Secreted |
| 70  | <b>um05942</b>   | related to monocarboxylate permease                                       | Non-Secreted |
| 71  | <b>um11203</b>   | conserved hypothetical protein                                            | Non-Secreted |
| 72  | <b>um06186</b>   | related to oxidoreductase, short-chain dehydrogenase/reductase            | Non-Secreted |
| 73  | <b>um06367</b>   | putative protein                                                          | Non-Secreted |
| 74  | <b>um06453</b>   | related to Transaldolase B                                                | Non-Secreted |
| 75  | <b>um06454</b>   | related to Mannose-6-phosphate isomerase                                  | Non-Secreted |
| 76  | <b>um04130</b>   | Dik6, novel virulence factor                                              | Non-Secreted |
| 77  | <b>um10885.2</b> | putative protein                                                          | Non-Secreted |
| 78  | <b>um10888</b>   | putative protein                                                          | Non-Secreted |
| 79  | <b>um04229</b>   | conserved hypothetical protein                                            | Non-Secreted |
| 80  | <b>um04498</b>   | putative protein                                                          | Non-Secreted |
| 81  | <b>um11984</b>   | conserved hypothetical protein                                            | Non-Secreted |
| 82  | <b>um11754</b>   | putative protein (C-terminal fragment)                                    | Non-Secreted |
| 83  | <b>um01722</b>   | conserved hypothetical protein                                            | Non-Secreted |
| 84  | <b>um10451</b>   | conserved hypothetical protein                                            | Non-Secreted |
| 85  | <b>um01968</b>   | conserved hypothetical protein                                            | Non-Secreted |
| 86  | <b>um01971</b>   | conserved hypothetical protein                                            | Non-Secreted |
| 87  | <b>um11378</b>   | probable Cyanate hydratase                                                | Non-Secreted |
| 88  | <b>um02008</b>   | conserved hypothetical protein                                            | Non-Secreted |
| 89  | <b>um11391</b>   | conserved hypothetical protein                                            | Non-Secreted |
| 90  | <b>um05230</b>   | probable Salicylate hydroxylase                                           | Non-Secreted |
| 91  | <b>um06326</b>   | conserved hypothetical protein                                            | Non-Secreted |
| 92  | <b>um02124</b>   | conserved hypothetical protein                                            | Non-Secreted |
| 93  | um00011          | probable AMD2 - amidase                                                   | Non-Secreted |
| 94  | um10005          | conserved hypothetical protein                                            | Non-Secreted |
| 95  | um10016          | conserved hypothetical protein                                            | Non-Secreted |
| 96  | um00103          | related to ESBP6 - similarity to Monocarboxylate transporter              | Non-Secreted |
| 97  | um10028          | conserved hypothetical protein                                            | Non-Secreted |
| 98  | um00182          | related to Lipase 2 precursor                                             | Non-Secreted |
| 99  | um10054.2        | hypothetical protein (fragment)                                           | Non-Secreted |
| 100 | um00211          | conserved hypothetical protein                                            | Non-Secreted |
| 101 | um00317          | hypothetical protein                                                      | Non-Secreted |
| 102 | um00400          | conserved hypothetical protein                                            | Non-Secreted |
| 103 | um00439          | conserved hypothetical protein                                            | Non-Secreted |
| 104 | um00445          | conserved hypothetical protein                                            | Non-Secreted |
| 105 | um00483          | putative protein                                                          | Non-Secreted |
| 106 | um10124          | related to RNA splicing endonuclease gamma subunit                        | Non-Secreted |
| 107 | um15088          | conserved hypothetical protein                                            | Non-Secreted |
| 108 | um11445          | putative protein                                                          | Non-Secreted |
| 109 | um11614          | related to TOM5 - mitochondrial outer membrane protein                    | Non-Secreted |
| 110 | um00736          | conserved hypothetical protein                                            | Non-Secreted |
| 111 | um00805          | putative protein                                                          | Non-Secreted |
| 112 | um11244          | related to FRE4 - Ferric reductase                                        | Non-Secreted |
| 113 | um00893          | related to veA protein                                                    | Non-Secreted |
| 114 | um15056          | related to CCC2 - copper resistance-associated P-type ATPase              | Non-Secreted |
| 115 | um12125          | conserved hypothetical protein                                            | Non-Secreted |
| 116 | um10232          | probable cytochrome b5                                                    | Non-Secreted |
| 117 | um01299          | conserved hypothetical Ustilago-specific protein                          | Non-Secreted |
| 118 | um11311          | putative protein                                                          | Non-Secreted |
| 119 | um01403          | conserved hypothetical protein                                            | Non-Secreted |
| 120 | um11333          | related to NDE1 - mitochondrial cytosolically directed NADH dehydrogenase | Non-Secreted |
| 121 | um01435          | related to MCH4 - monocarboxylate transporter                             | Non-Secreted |
| 122 | um11670          | putative protein                                                          | Non-Secreted |
| 123 | um12142          | conserved hypothetical protein                                            | Non-Secreted |
| 124 | um01567          | related to 2,5-diketo-D-gluconic acid reductase                           | Non-Secreted |
| 125 | um11357          | conserved hypothetical protein                                            | Non-Secreted |
| 126 | um01718          | probable glucosamine-6-phosphate isomerase                                | Non-Secreted |
| 127 | um11365          | conserved hypothetical protein                                            | Non-Secreted |
| 128 | um02283          | conserved hypothetical protein                                            | Non-Secreted |
| 129 | um02286          | conserved hypothetical protein                                            | Non-Secreted |
| 130 | um02354          | putative protein                                                          | Non-Secreted |
| 131 | um10131          | related to phosphatidylserine decarboxylase proenzyme 2 precursor         | Non-Secreted |
| 132 | um12188          | hypothetical protein                                                      | Non-Secreted |
| 133 | um02460          | putative protein                                                          | Non-Secreted |
| 134 | um02473          | conserved hypothetical Ustilago-specific protein                          | Non-Secreted |
| 135 | um10164          | related to E2 ubiquitin-conjugating enzyme                                | Non-Secreted |
| 136 | um02514.2        | related to UPF3 - Nonsense-mediated mRNA decay protein                    | Non-Secreted |
| 137 | um02574          | related to c-module-binding factor                                        | Non-Secreted |
| 138 | um02585          | related to TPO1 - Vacuolar polyamine-H <sup>+</sup> antiporter            | Non-Secreted |

|     |           |                                                                         |              |
|-----|-----------|-------------------------------------------------------------------------|--------------|
| 139 | um02666   | putative protein                                                        | Non-Secreted |
| 140 | um02727   | probable lysozyme                                                       | Non-Secreted |
| 141 | um11726   | conserved hypothetical protein                                          | Non-Secreted |
| 142 | um02765   | conserved hypothetical protein                                          | Non-Secreted |
| 143 | um10596   | probable aldehyde dehydrogenase                                         | Non-Secreted |
| 144 | um02771   | putative protein                                                        | Non-Secreted |
| 145 | um02791   | related to GABA permease                                                | Non-Secreted |
| 146 | um02948   | conserved hypothetical protein                                          | Non-Secreted |
| 147 | um10333   | conserved hypothetical protein                                          | Non-Secreted |
| 148 | um02972   | putative protein                                                        | Non-Secreted |
| 149 | um03016   | conserved hypothetical protein                                          | Non-Secreted |
| 150 | um11947   | conserved hypothetical protein                                          | Non-Secreted |
| 151 | um03128   | conserved hypothetical protein                                          | Non-Secreted |
| 152 | um10393   | conserved hypothetical protein                                          | Non-Secreted |
| 153 | um03221   | conserved hypothetical protein                                          | Non-Secreted |
| 154 | um03288   | related to dna polymerase epsilon p17 subunit                           | Non-Secreted |
| 155 | um03337   | related to MRPL35 - mitochondrial ribosomal protein, large subunit      | Non-Secreted |
| 156 | um12223   | putative protein                                                        | Non-Secreted |
| 157 | um12227   | related to DASH complex subunit spc19 (Outer kinetochore protein spc19) | Non-Secreted |
| 158 | um11017   | related to CAP59 (required for capsule formation)                       | Non-Secreted |
| 159 | um03417   | putative acetamidase                                                    | Non-Secreted |
| 160 | um03422   | conserved hypothetical protein                                          | Non-Secreted |
| 161 | um03513   | conserved hypothetical protein                                          | Non-Secreted |
| 162 | um03518   | related to pyrimidine 5-nucleotidase                                    | Non-Secreted |
| 163 | um03524   | related to peroxisomal amine oxidase (copper-containing)                | Non-Secreted |
| 164 | um03540   | conserved hypothetical protein                                          | Non-Secreted |
| 165 | um11731   | related to nadh-ubiquinone oxidoreductase 9.5 kDa subunit               | Non-Secreted |
| 166 | um03620   | related to Regulatory protein alcR                                      | Non-Secreted |
| 167 | um03642   | conserved hypothetical protein                                          | Non-Secreted |
| 168 | um03653   | conserved hypothetical protein                                          | Non-Secreted |
| 169 | um03691   | probable lysine-specific permease                                       | Non-Secreted |
| 170 | um03835   | putative protein                                                        | Non-Secreted |
| 171 | um10511   | conserved hypothetical protein                                          | Non-Secreted |
| 172 | um11151   | related to Type I protein geranylgeranyltransferase beta subunit        | Non-Secreted |
| 173 | um04388   | conserved hypothetical protein                                          | Non-Secreted |
| 174 | um10514   | conserved hypothetical protein                                          | Non-Secreted |
| 175 | um10535   | related to cell cycle control protein cwf15                             | Non-Secreted |
| 176 | um12011   | putative protein                                                        | Non-Secreted |
| 177 | um11561   | related to 60S ribosomal protein L28                                    | Non-Secreted |
| 178 | um05014   | related to Serine/threonine kinase                                      | Non-Secreted |
| 179 | um05050   | hypothetical protein                                                    | Non-Secreted |
| 180 | um10741   | related to Sedlin (trafficking protein particle complex protein 2)      | Non-Secreted |
| 181 | um10917   | probable RING-box protein 1                                             | Non-Secreted |
| 182 | um12024   | putative protein                                                        | Non-Secreted |
| 183 | um11582   | conserved hypothetical protein                                          | Non-Secreted |
| 184 | um11586   | putative protein                                                        | Non-Secreted |
| 185 | um05790   | conserved hypothetical protein                                          | Non-Secreted |
| 186 | um04770   | related to splicing factor SPF30                                        | Non-Secreted |
| 187 | um10698   | related to NEFA-interacting nuclear protein NIP30                       | Non-Secreted |
| 188 | um10746.2 | conserved hypothetical protein                                          | Non-Secreted |
| 189 | um10757   | conserved hypothetical protein                                          | Non-Secreted |
| 190 | um10355   | conserved hypothetical protein                                          | Non-Secreted |
| 191 | um05547   | related to Alpha-1,2 glucosyltransferase ALG10                          | Non-Secreted |
| 192 | um11180   | putative protein                                                        | Non-Secreted |
| 193 | um11181   | probable LEU2 - beta-isopropyl-malate dehydrogenase                     | Non-Secreted |
| 194 | um05600   | probable UGA2 - succinate semialdehyde dehydrogenase                    | Non-Secreted |
| 195 | um05601   | hypothetical protein                                                    | Non-Secreted |
| 196 | um05331   | conserved hypothetical protein                                          | Non-Secreted |
| 197 | um05335   | related to Protein C20orf43                                             | Non-Secreted |
| 198 | um05423   | related to Monoamine oxidase A [flavin-containing]                      | Non-Secreted |
| 199 | um05830   | putative protein                                                        | Non-Secreted |
| 200 | um12027   | putative protein                                                        | Non-Secreted |
| 201 | um11208   | putative protein                                                        | Non-Secreted |
| 202 | um10971   | related to transcription factor hap3                                    | Non-Secreted |
| 203 | um12331   | conserved hypothetical protein                                          | Non-Secreted |
| 204 | um06389   | conserved hypothetical protein                                          | Non-Secreted |
| 205 | um06455   | conserved hypothetical protein                                          | Non-Secreted |
| 206 | um03930   | conserved hypothetical protein                                          | Non-Secreted |

|     |                |                                                         |              |
|-----|----------------|---------------------------------------------------------|--------------|
| 207 | um03960        | putative protein                                        | Non-Secreted |
| 208 | um03978        | hypothetical protein                                    | Non-Secreted |
| 209 | um04051        | conserved hypothetical protein                          | Non-Secreted |
| 210 | um04070        | Rho3 GTP binding protein                                | Non-Secreted |
| 211 | um04186.2      | probable general amino acid permease                    | Non-Secreted |
| 212 | um10420        | related to meiotic recombination protein SPO11          | Non-Secreted |
| 213 | um11987        | conserved hypothetical protein                          | Non-Secreted |
| 214 | um10911        | conserved hypothetical protein                          | Non-Secreted |
| 215 | um04592        | conserved hypothetical protein                          | Non-Secreted |
| 216 | um10986        | putative protein                                        | Non-Secreted |
| 217 | um04637        | conserved hypothetical protein                          | Non-Secreted |
| 218 | um04661        | conserved hypothetical protein                          | Non-Secreted |
| 219 | um04673        | related to RecQ family helicase RecQL1                  | Non-Secreted |
| 220 | um11752        | conserved hypothetical protein                          | Non-Secreted |
| 221 | um04362        | related to Cytochrome P450 8B1                          | Non-Secreted |
| 222 | um12263        | hypothetical protein                                    | Non-Secreted |
| 223 | um15074        | related to ABC transporter                              | Non-Secreted |
| 224 | um10881        | probable ribonuclease T1                                | Non-Secreted |
| 225 | um12176        | conserved hypothetical protein                          | Non-Secreted |
| 226 | um01916        | conserved hypothetical protein                          | Non-Secreted |
| 227 | um11379        | putative protein                                        | Non-Secreted |
| 228 | um01988        | related to Oxidoreductase                               | Non-Secreted |
| 229 | um02022        | conserved hypothetical protein                          | Non-Secreted |
| 230 | um05128        | conserved hypothetical protein                          | Non-Secreted |
| 231 | um10178        | conserved hypothetical protein                          | Non-Secreted |
| 232 | um05207        | conserved hypothetical protein                          | Non-Secreted |
| 233 | um06270        | conserved hypothetical protein                          | Non-Secreted |
| 234 | um10764        | related to TR4 orphan receptor associated protein TRA16 | Non-Secreted |
| 235 | um02147        | related to Cytoplasmic acetyl-CoA hydrolase 1           | Non-Secreted |
| 236 | <b>um11362</b> | putative protein                                        | Secreted     |
| 237 | <b>um05097</b> | related to secreted aspartic protease 2                 | Secreted     |
| 238 | <b>um05229</b> | related to Beta-mannosidase precursor                   | Secreted     |
| 239 | <b>um02212</b> | related to trehalase precursor                          | Secreted     |
| 240 | <b>um02229</b> | conserved hypothetical Ustilago-specific protein        | Secreted     |
| 241 | <b>um02298</b> | hypothetical protein                                    | Secreted     |
| 242 | <b>um02466</b> | hypothetical protein                                    | Secreted     |
| 243 | <b>um02510</b> | probable PGU1 - Endo-polygalacturonase                  | Secreted     |
| 244 | <b>um02535</b> | conserved hypothetical Ustilago-specific protein        | Secreted     |
| 245 | <b>um11931</b> | conserved hypothetical protein                          | Secreted     |
| 246 | <b>um02851</b> | putative protein                                        | Secreted     |
| 247 | <b>um02852</b> | conserved hypothetical Ustilago-specific protein        | Secreted     |
| 248 | <b>um12197</b> | putative protein                                        | Secreted     |
| 249 | <b>um03065</b> | putative protein                                        | Secreted     |
| 250 | <b>um03105</b> | hypothetical protein                                    | Secreted     |
| 251 | <b>um03112</b> | conserved hypothetical protein                          | Secreted     |
| 252 | <b>um03201</b> | hypothetical protein                                    | Secreted     |
| 253 | <b>um10403</b> | conserved hypothetical Ustilago-specific protein        | Secreted     |
| 254 | <b>um03223</b> | Mig1 protein, induced during biotrophic phase           | Secreted     |
| 255 | <b>um12215</b> | hypothetical protein                                    | Secreted     |
| 256 | <b>um12216</b> | related to Mig1 protein                                 | Secreted     |
| 257 | <b>um03397</b> | hypothetical protein                                    | Secreted     |
| 258 | <b>um03749</b> | conserved hypothetical Ustilago-specific protein        | Secreted     |
| 259 | <b>um03750</b> | conserved hypothetical Ustilago-specific protein        | Secreted     |
| 260 | <b>um03923</b> | conserved hypothetical protein                          | Secreted     |
| 261 | <b>um11763</b> | related to acetylxylylase                               | Secreted     |
| 262 | <b>um04309</b> | probable Alpha-L-arabinofuranosidase precursor          | Secreted     |
| 263 | <b>um05295</b> | conserved hypothetical Ustilago-specific protein        | Secreted     |
| 264 | <b>um05306</b> | conserved hypothetical Ustilago-specific protein        | Secreted     |
| 265 | <b>um05312</b> | conserved hypothetical Ustilago-specific protein        | Secreted     |
| 266 | <b>um05928</b> | conserved hypothetical Ustilago-specific protein        | Secreted     |
| 267 | <b>um05930</b> | conserved hypothetical Ustilago-specific protein        | Secreted     |
| 268 | <b>um11002</b> | conserved hypothetical Ustilago-specific protein        | Secreted     |
| 269 | <b>um00534</b> | conserved hypothetical protein                          | Secreted     |
| 270 | <b>um00792</b> | conserved hypothetical Ustilago-specific protein        | Secreted     |
| 271 | <b>um00795</b> | hypothetical protein                                    | Secreted     |
| 272 | <b>um01422</b> | probable Lipase B precursor                             | Secreted     |
| 273 | <b>um01690</b> | hypothetical protein                                    | Secreted     |

|     |           |                                                                        |          |
|-----|-----------|------------------------------------------------------------------------|----------|
| 274 | um02071   | conserved hypothetical protein                                         | Secreted |
| 275 | um02921   | conserved hypothetical protein                                         | Secreted |
| 276 | um12226   | putative protein                                                       | Secreted |
| 277 | um03411   | probable endo-1,4-beta-xylanase                                        | Secreted |
| 278 | um04057   | related to dihydroflavonol reductase                                   | Secreted |
| 279 | um05046   | conserved hypothetical protein                                         | Secreted |
| 280 | um04816   | related to Endoglucanase I precursor                                   | Secreted |
| 281 | um05495   | conserved hypothetical protein                                         | Secreted |
| 282 | um05964   | related to esterase                                                    | Secreted |
| 283 | um06050   | conserved hypothetical protein                                         | Secreted |
| 284 | um06116   | putative protein                                                       | Secreted |
| 285 | um06440   | conserved hypothetical protein                                         | Secreted |
| 286 | um10052   | conserved hypothetical protein                                         | Secreted |
| 287 | um00446   | probable beta-glucosidase                                              | Secreted |
| 288 | um00480   | transmembrane mucin involved in surface sensing via MAP-kinase cascade | Secreted |
| 289 | um00837.2 | related to Alpha-L-arabinofuranosidase I precursor                     | Secreted |
| 290 | um12127   | hypothetical protein                                                   | Secreted |
| 291 | um01553   | conserved hypothetical protein                                         | Secreted |
| 292 | um10816   | conserved hypothetical protein                                         | Secreted |

Gene ids in bold representing *U. maydis* genes with no gene remnants or distantly similar genes in the genome of *M. pennsylvanicum*.

**Supplementary table 2.** *Ustilago maydis* previously defined 12 pathogenicity clusters and their orthologous genes in other genomes.

| <i>U. maydis</i>  |    |           | <i>M. pennsylvanicum</i> |    |            |         |          |    | <i>S. reilianum</i> |    |           |           |            |    | <i>U. hordei</i> |    |            |            |    |    |
|-------------------|----|-----------|--------------------------|----|------------|---------|----------|----|---------------------|----|-----------|-----------|------------|----|------------------|----|------------|------------|----|----|
| Our Results       |    | Published | orthoMCL                 |    | Inparanoid |         | orthoMCL |    | Inparanoid          |    | orthoMCL  |           | Inparanoid |    | orthoMCL         |    | Inparanoid |            |    |    |
| SP                | TP | SP        | TP                       | SP | TP         | SP      | TP       | SP | TP                  | SP | TP        | SP        | TP         | SP | TP               | SP | TP         |            |    |    |
| <b>Um_1A:</b>     |    |           |                          |    |            |         |          |    |                     |    |           |           |            |    |                  |    |            |            |    |    |
| um00444           |    |           | mp04347                  | NS | NS         | mp04347 | NS       | NS | sr10114             | NS | NS        | sr10114   | NS         | NS | UHOR_00696       | NS | NS         | UHOR_00696 | NS | NS |
| um10115           | 1  | 1         | NA                       |    |            | NA      |          |    | NA                  |    |           | NA        |            |    | NA               |    |            | NA         |    |    |
| um00445           | 1  | 1         | NA                       |    |            | NA      |          |    | sr10115             | 2  | sr10115   | 2         |            |    | UHOR_00698       | NS | NS         | NA         |    |    |
| um00446           | 1  | 1         | NA                       |    |            | NA      |          |    | sr10116             | 1  | sr10116   | 1         |            |    | UHOR_00702       | 1  | UHOR_00702 | 1          |    |    |
| um00447           |    |           | mp02192                  | NS | NS         | mp02192 | NS       | NS | sr10118.2           | NS | NS        | sr10118.2 | NS         | NS | UHOR_00703       | NS | NS         | UHOR_00703 | NS | NS |
| <b>Um_2A:</b>     |    |           |                          |    |            |         |          |    |                     |    |           |           |            |    |                  |    |            |            |    |    |
| um01233           |    |           | mp05071                  | NS | NS         | mp05071 | NS       | NS | sr10307             | NS | NS        | sr10307   | NS         | NS | UHOR_01859       | NS | NS         | UHOR_01859 | NS | NS |
| um01234           | 5  | 5         | mp05037                  |    |            | mp05037 |          |    | sr10308             | NS | sr10308   | NS        |            |    | UHOR_01860       | NS | 5          | UHOR_01860 | NS | 5  |
| um01235           | 1  | 1         | NA                       |    |            | NA      |          |    | sr10309             | 1  | sr10309   | 1         |            |    | NA               |    |            | UHOR_01863 |    | 1  |
| um01236           | 2  | 2         | mp05069                  | NS | NS         | NA      |          |    | [sr10310]           | 1  | [sr10310] | 1         |            |    | UHOR_01866       | NS | NS         | NA         |    |    |
| um01237           | 2  | 2         | mp05069                  | NS | NS         | mp05069 | NS       | NS | sr10311             | 1  | sr10311   | 1         |            |    | UHOR_01866       | NS | NS         | NA         |    |    |
| um01238           | 1  | 1         | NA                       |    |            | NA      |          |    | [sr10312]           | 2  | [sr10312] | 2         |            |    | UHOR_01866       | NS | NS         | NA         |    |    |
| um01239           | 1  | 1         | NA                       |    |            | NA      |          |    | sr10312             | 2  | sr10312   | 2         |            |    | NA               |    |            | NA         |    |    |
| um01240           | 1  | 1         | NA                       |    |            | NA      |          |    | [sr10311]           | 2  | [sr10311] | 2         |            |    | NA               |    |            | NA         |    |    |
| um01241           | 4  | 4         | mp05068                  |    |            | mp05068 |          | 1  | sr10316             | 2  | sr10316   | 2         |            |    | NA               |    |            | NA         |    |    |
| um01242           |    |           | mp05067                  | NS | NS         | mp05067 | NS       | NS | [sr10317]           | 2  | [sr10317] | 2         |            |    | UHOR_01868       | NS | NS         | UHOR_01868 | NS | NS |
| <b>Um_2B</b>      |    |           |                          |    |            |         |          |    |                     |    |           |           |            |    |                  |    |            |            |    |    |
| um01296           |    |           | mp03960                  | NS | NS         | mp03960 | NS       | NS | sr10428.2           | NS | NS        | sr10428.2 | NS         | NS | UHOR_01942       | NS | NS         | UHOR_01942 | NS | NS |
| um01297           | 1  | 1         | NA                       |    |            | mp03981 |          | 2  | sr10429.2           | 1  | sr10429.2 | 1         |            |    | UHOR_01944       | 1  | UHOR_01944 | 1          |    |    |
| um01298.2         | 1  | 1         | NA                       |    |            | mp03086 |          | NS | sr10430.2           | NS | NS        | sr10430.2 | NS         | NS | NA               |    |            | NA         |    |    |
| um01299           | 1  | 1         | NA                       |    |            | NA      |          |    | sr10431.2           | 1  | sr10431.2 | 1         |            |    | UHOR_01950       | NS | NS         | UHOR_01950 | NS | NS |
| um01300           | 2  | 2         | NA                       |    |            | NA      |          |    | NA                  |    | NA        |           |            |    | UHOR_01952       | 1  | UHOR_01952 | 1          |    |    |
| um01301           | 2  | 2         | NA                       |    |            | NA      |          |    | sr10432.2           | 1  | sr10432.2 | 1         |            |    | NA               |    |            | NA         |    |    |
| um01302           | 1  | 1         | NA                       |    |            | NA      |          |    | sr20001             | 1  | sr20001   | 1         |            |    | NA               |    |            | NA         |    |    |
| um10233           | 3  | 3         | NA                       |    |            | NA      |          |    | NA                  |    | NA        |           |            |    | NA               |    |            | NA         |    |    |
| um10234           |    |           | mp03980                  | NS | NS         | mp03980 | NS       | NS | sr10434             | NS | NS        | sr10434   | NS         | NS | UHOR_01953       | NS | NS         | UHOR_01953 | NS | NS |
| <b>Um_3A</b>      |    |           |                          |    |            |         |          |    |                     |    |           |           |            |    |                  |    |            |            |    |    |
| um01885           |    |           | mp04219                  | NS | NS         | mp04219 | NS       | NS | sr10604             | NS | NS        | sr10604   | NS         | NS | UHOR_02794       | NS | NS         | UHOR_02794 | NS | NS |
| um01886           | 1  | 1         | mp04220                  |    |            | mp04220 |          | 1  | sr10606             | 1  | sr10606   | 1         |            |    | UHOR_02798       | 2  | UHOR_02798 | 2          |    |    |
| um01887 (um12173) |    | 1         | mp04192                  | NS | NS         | mp04192 | NS       | NS | sr10605             | NS | NS        | sr10605   | NS         | NS | UHOR_02796       | NS | NS         | UHOR_02796 | NS | NS |
| um01888           | 2  | 2         | mp04217                  |    |            | mp04217 |          | 3  | sr10607             | 2  | sr10607   | 2         |            |    | UHOR_02799       | 2  | UHOR_02799 | 2          |    |    |
| um01889           |    |           | mp04216                  |    |            | mp04216 |          |    | sr10608             | NS | NS        | sr10608   | NS         | NS | UHOR_02801       | NS | NS         | UHOR_02801 | NS | NS |

Um\_5A

|         |   |   |
|---------|---|---|
| um02191 |   |   |
| um02192 | 1 | 1 |
| um02193 | 1 | 1 |
| um02194 | 1 | 1 |
| um10070 | 2 | 2 |
| um02196 | 1 | 1 |
| um02197 |   |   |

|         |    |    |         |    |    |
|---------|----|----|---------|----|----|
| mp05142 | NS | NS | mp05142 | NS | NS |
| NA      |    |    | NA      |    |    |
| NA      |    |    | NA      |    |    |
| NA      |    |    | NA      |    |    |
| mp05143 | NS | 5  | mp05143 | NS | 5  |
| mp05158 |    | 1  | mp05158 |    | 1  |
| mp05157 | NS | NS | mp05157 | NS | NS |

|         |    |         |         |    |    |
|---------|----|---------|---------|----|----|
| sr10765 |    | sr10765 |         |    |    |
| NA      |    | sr10766 |         | 1  |    |
| NA      |    | NA      |         |    |    |
| NA      |    | NA      |         |    |    |
| sr10769 | NS | 5       | sr10769 | NS | 5  |
| sr10770 |    | 1       | NA      |    |    |
| sr10772 | NS | NS      | sr10772 | NS | NS |

|              |    |    |            |    |    |    |
|--------------|----|----|------------|----|----|----|
| UHOR_03611   | NS | NS | UHOR_03611 | NS | NS |    |
| NA           |    |    | NA         |    |    |    |
| NA           |    |    | NA         |    |    |    |
| NA           |    |    | NA         |    |    |    |
| UHOR_03615   | NS | NS | UHOR_03615 | NS | NS |    |
| UHOR_03616   |    |    |            |    |    |    |
| [UHOR_04380  |    |    |            |    |    |    |
| UHOR_12270   |    |    |            |    |    |    |
| UHOR_12275]  | NS | NS | NA         |    |    |    |
| UHOR_03617   |    |    |            |    |    |    |
| [UHOR_06287] | NS | NS | NA         |    | NS | NS |

Um\_5B

|         |   |   |
|---------|---|---|
| um02472 |   |   |
| um02473 | 2 | 2 |
| um02474 | 2 | 2 |
| um02475 | 1 | 1 |
| um02476 |   |   |

|         |    |    |         |    |    |
|---------|----|----|---------|----|----|
| mp01042 | NS | NS | mp01042 | NS | NS |
| NA      |    |    | NA      |    |    |
| NA      |    |    | NA      |    |    |
| mp01043 |    | 1  | NA      |    |    |
| mp00531 | NS | NS | mp00531 | NS | NS |

|           |    |    |           |    |    |
|-----------|----|----|-----------|----|----|
| sr10914   | NS | NS | sr10914   | NS | NS |
| sr10916.2 |    | 3  | sr10916.2 |    | 3  |
| NA        |    |    | NA        |    |    |
| sr10918.2 |    | 1  | sr10918.2 |    | 1  |
| sr10919   | NS | NS | sr10919   |    |    |

|            |    |    |            |    |    |
|------------|----|----|------------|----|----|
| UHOR_12669 | NS | NS | UHOR_12669 | NS | NS |
| UHOR_01858 | NS | NS | UHOR_01858 | NS | NS |
| NA         |    |    | NA         |    |    |
| UHOR_12209 |    | 1  | NA         |    |    |
| UHOR_12141 | NS | NS | UHOR_12141 | NS | NS |

Um\_6A

|         |   |   |
|---------|---|---|
| um11414 |   |   |
| um02533 | 2 | 2 |
| um11415 | 2 | 2 |
| um02535 | 1 | 1 |
| um11416 | 1 | 1 |
| um02537 | 1 | 1 |
| um02538 | 1 | 1 |
| um11417 | 1 | 1 |
| um02540 | 1 | 1 |
| um02541 |   |   |
| um02542 |   |   |

|           |    |    |           |    |    |
|-----------|----|----|-----------|----|----|
| mp01106   | NS | NS | mp01106   | NS | NS |
| NA        |    |    | NA        |    |    |
| NA        |    |    | NA        |    |    |
| NA        |    |    | mp01108   |    | 1  |
| NA        |    |    | mp01108   |    | 1  |
| NA        |    |    | mp01108   |    | 1  |
| NA        |    |    | NA        |    |    |
| mp01109   |    | 1  | mp01109   |    | 1  |
| [mp05408] |    |    | [mp05408] |    |    |
| mp01147   |    |    | mp05409   |    |    |
| [mp05409] | NS | NS | [mp01147] | NS | NS |
| mp01110   | NS | NS | mp01110   | NS | NS |

|           |    |    |           |    |    |
|-----------|----|----|-----------|----|----|
| sr10992   | NS | NS | sr10992   | NS | NS |
| sr10994.2 |    | 1  | sr10994.2 |    | 1  |
| sr20006   |    | 1  | sr20006   |    | 1  |
| sr10996.2 |    | 1  | sr10996.2 |    | 1  |
| NA        |    |    | sr10997.2 |    | 2  |
| NA        |    |    | NA        |    |    |
| sr20007   |    | 3  | sr20007   |    | 3  |
| sr11000.2 |    | 1  | sr11000.2 |    | 1  |
| sr11009   |    | 1  | sr11009   |    | 1  |
| sr11010   | NS | NS | sr11010   | NS | NS |
| sr11011   | NS | NS | sr11011   | NS | NS |

|            |    |    |            |    |    |    |
|------------|----|----|------------|----|----|----|
| UHOR_04066 | NS | NS | UHOR_04066 | NS | NS |    |
| NA         |    |    | NA         |    |    |    |
| NA         |    |    | NA         |    |    |    |
| UHOR_12257 |    | 1  | UHOR_12257 |    | 1  |    |
| NA         |    |    | NA         |    |    |    |
| NA         |    |    | UHOR_12260 |    | NS | NS |
| NA         |    |    | NA         |    |    |    |
| NA         |    |    | NA         |    |    |    |
| NA         |    |    | NA         |    |    |    |
| UHOR_04067 | NS | NS | UHOR_04067 | NS | NS |    |
| UHOR_04068 | NS | NS | UHOR_04068 | NS | NS |    |

Um\_8A

|           |   |   |
|-----------|---|---|
| um03200   |   |   |
| um03201   | 2 | 2 |
| um03202   |   |   |
| [um10403] | 1 | 1 |
| um10403   | 1 | 1 |
| um03204   |   |   |

|           |    |    |         |    |    |
|-----------|----|----|---------|----|----|
| mp02487   | NS | NS | mp02487 | NS | NS |
| NA        |    |    | NA      |    |    |
| NA        |    |    | NA      |    |    |
| mp02491   |    |    | NA      |    |    |
| [mp03783] | NS | NS | mp02491 | NS | NS |

|           |    |    |         |    |    |
|-----------|----|----|---------|----|----|
| sr11099   | NS | NS | sr11099 | NS | NS |
| sr11100   |    | 1  | sr11100 |    | 1  |
| sr11101   |    |    |         |    |    |
| [sr11102] |    | 1  | sr11102 |    | 1  |
| sr11101   |    |    |         |    |    |
| [sr11102] |    | 1  | sr11102 |    | 1  |
| sr11106   | NS | NS | sr11106 | NS | NS |

|              |    |    |            |    |    |
|--------------|----|----|------------|----|----|
| UHOR_04983   | NS | NS | UHOR_04983 | NS | NS |
| UHOR_04984   |    | 1  | UHOR_04984 |    | 1  |
| UHOR_04986   |    | 1  | UHOR_04986 |    | 1  |
| UHOR_04986   |    | 1  | UHOR_04986 |    | 1  |
| UHOR_04780   |    |    |            |    |    |
| [UHOR_04988] | NS | NS | UHOR_04988 | NS | NS |

Um\_9A

|         |   |   |
|---------|---|---|
| um03613 |   |   |
| um03614 | 4 | 4 |
| um03615 | 2 | 2 |
| um03616 | 1 | 1 |
| um03617 |   |   |

|         |    |    |         |    |    |
|---------|----|----|---------|----|----|
| mp00947 | NS | NS | mp00947 | NS | NS |
| mp00948 |    | 2  | mp00948 |    | 2  |
| mp00910 |    | 2  | mp00910 |    | 2  |
| mp00949 | NS | 1  | mp00949 | NS | 1  |
| mp00909 | NS | NS | mp00909 | NS | NS |

|           |    |    |           |    |    |
|-----------|----|----|-----------|----|----|
| sr11162   | NS | NS | sr11162   | NS | NS |
| sr11163.2 |    | 1  | sr11163.2 |    | 1  |
| sr11165   |    | 3  | sr11165   |    | 3  |
| sr11167.2 | NS | 1  | sr11167.2 | NS | 1  |
| sr11168   |    |    | sr11168   |    |    |

|            |    |    |            |    |    |
|------------|----|----|------------|----|----|
| UHOR_05544 | NS | NS | UHOR_05544 | NS | NS |
| UHOR_05545 |    | 1  | UHOR_05545 |    | 1  |
| UHOR_05546 |    | 2  | UHOR_05546 |    | 2  |
| UHOR_05548 |    | 1  | UHOR_05548 |    | 1  |
| UHOR_05550 | NS | NS | UHOR_05550 | NS | NS |

Um\_10A

|           |   |   |           |       |           |       |            |       |           |       |              |       |            |            |
|-----------|---|---|-----------|-------|-----------|-------|------------|-------|-----------|-------|--------------|-------|------------|------------|
| Um03743.2 |   |   | mp00222   | NS NS | mp00222   | NS NS | sr11224    | NS NS | sr11224   | NS NS | UHOR_15312   | NS NS | UHOR_15312 | NS NS      |
| um03744   | 1 | 1 | NA        |       | NA        |       | NA         |       | NA        |       | NA           |       | NA         |            |
| um03745   |   |   |           |       |           |       |            |       |           |       |              |       |            |            |
| [um03750] | 1 | 1 | NA        |       | NA        |       | sr11231    | 1     | sr11231   | 1     | UHOR_14478   |       | 1          | NA         |
| um03746   | 1 | 1 | mp00270   | NS NS | mp00270   | NS NS | sr20008    | 2     | sr20008   | 2     | UHOR_14479   |       | 3          | UHOR_14479 |
| um03747   | 1 | 1 | NA        |       | mp00269   |       | NA         |       | sr11233   | 1     | UHOR_14481   |       | 1          | UHOR_14481 |
| um03748   | 2 | 2 | NA        |       | NA        |       | NA         |       | NA        |       | NA           |       |            |            |
| um03749   | 2 | 2 | NA        |       | NA        |       | sr11234.2  | 1     | sr11234.2 | 1     | UHOR_07107   |       | 1          | UHOR_07107 |
| um03750   | 1 | 1 | NA        |       | NA        |       | sr11231    | 1     | sr11231   | 1     | UHOR_14478   |       | 1          | NA         |
| um03751   | 1 | 1 | NA        |       | NA        |       | sr11236.2  | 1     | sr11236.2 | 1     | NA           |       |            |            |
|           |   |   |           |       |           |       | sr11237    |       |           |       |              |       |            |            |
| um03752   |   |   | mp03415   |       | mp03415   |       | [sr11240,  |       |           |       | UHOR_07319   |       |            |            |
| [um03753] | 2 | 2 | [mp0267]  | NS    | [mp0267]  | NS    | sr11239.2] | 1     | sr11237   | 1     | [UHOR_08139] |       | 1          | NA         |
|           |   |   |           |       |           |       | sr11237    |       |           |       |              |       |            |            |
| um03753   | 1 | 1 | mp03415   |       | mp03415   |       | [sr11240,  |       |           |       | UHOR_07319   |       |            |            |
| um03754   |   |   | [mp00267] | NS    | [mp00267] | NS    | sr11239.2] | 1     | sr11240   | 1     | [UHOR_08139] |       | 1          | UHOR_07319 |
| um10660   |   |   | mp00266   |       | mp00266   |       | sr11241    | NS NS | sr11241   | NS NS | UHOR_05718   | NS NS | UHOR_05718 | NS NS      |
|           |   |   |           |       |           |       | NA         |       | NA        |       | NA           |       | NA         |            |

Um\_19A

|           |   |   |         |       |         |       |           |       |           |         |              |       |              |       |
|-----------|---|---|---------|-------|---------|-------|-----------|-------|-----------|---------|--------------|-------|--------------|-------|
| um05293   |   |   | mp02620 | NS NS | mp02620 | NS NS | sr10039   | NS NS | sr10039   | NS NS   | UHOR_08123   | NS NS | UHOR_08123   | NS NS |
| um05294   | 1 | 1 | NA      |       | NA      |       | NA        |       | NA        |         | NA           |       | UHOR_10021   | 3     |
| um05295   | 1 | 1 | NA      |       | NA      |       | sr10050   | 3     | sr10050   | 3       | UHOR_10021   | 3     | UHOR_10022   | 1     |
| um05296   |   |   | NA      |       | NA      |       | NA        |       | NA        |         | NA           |       | NA           |       |
| um10553   | 1 | 1 | NA      |       | NA      |       | sr10051   | NS NS | sr10051   | NS NS   | NA           |       | NA           |       |
| um10554   | 3 | 3 | NA      |       | NA      |       | Sr10052.2 | 1     | sr10052.2 | 1       | NA           |       | NA           |       |
| um05299   | 1 | 1 | NA      |       | NA      |       | sr10053   | NS    | 4         | sr10053 | NS           | 4     | NA           | NA    |
| um05300   | 1 | 1 | mp02621 |       | mp02621 |       | sr10054   | 2     | sr10054   | 2       | NA           |       | NA           | NA    |
| um05301   | 2 | 2 | NA      |       | NA      |       | sr10055   | 2     | sr10055   | 2       | NA           |       | NA           | NA    |
| um05302   | 1 | 1 | NA      |       | NA      |       | sr10057   | 2     | sr10057   | 2       | NA           |       | NA           | NA    |
| um05303   | 1 | 1 | NA      |       | NA      |       | sr20012   | NS NS | sr20012   | NS NS   | NA           |       | NA           | NA    |
| um10555   | 1 | 1 | NA      |       | NA      |       | NA        |       | NA        |         | NA           |       | NA           | NA    |
| um05305   | 1 | 1 | NA      |       | NA      |       | sr10058   | 2     | sr10058   | 2       | NA           |       | NA           | NA    |
| um05306   | 1 | 1 | NA      |       | NA      |       | sr10059   | 1     | sr10059   | 1       | UHOR_08128   | 1     | UHOR_08128   | 1     |
| um10556   | 1 | 1 | NA      |       | NA      |       | sr10060   | NS NS | sr10060   | NS NS   | NA           |       | NA           | NA    |
| um05308   | 1 | 1 | NA      |       | NA      |       | NA        |       | NA        |         | NA           |       | NA           | NA    |
| um05309   |   |   |         |       |         |       |           |       |           |         |              |       |              |       |
| [um05310] | 3 | 3 | NA      |       | NA      |       | sr20013   | 2     | sr20013   | 2       | NA           |       | NA           | NA    |
| um05310   | 1 | 1 | NA      |       | NA      |       | sr20013   | 2     | sr20013   | 2       | NA           |       | NA           | NA    |
|           |   |   |         |       |         |       |           |       |           |         |              |       |              |       |
| um05311   | 1 | 1 | NA      |       | NA      |       | NA        |       | NA        |         | UHOR_08130   |       | UHOR_08130   |       |
| um05312   | 1 | 1 | NA      |       | NA      |       | sr20014   | 1     | sr20014   | 1       | [UHOR_08132] | 1     | [UHOR_08132] | 1     |
|           |   |   |         |       |         |       |           |       |           |         |              |       |              |       |
|           |   |   |         |       |         |       |           |       |           |         |              |       |              |       |
| um05313   |   |   | NA      |       | NA      |       | NA        |       | sr05445   | NS NS   | NA           |       | UHOR_08134   |       |
| um05314   | 1 | 1 | NA      |       | NA      |       | sr10069   | 1     | sr10069   | 1       | NA           |       | UHOR_08134   |       |
| um10557   | 1 | 1 | NA      |       | NA      |       | NA        |       | NA        |         | NA           |       | UHOR_07208   |       |
| um05316   |   |   | NA      |       | NA      |       | NA        |       | NA        |         | NA           |       | [UHOR_01239, |       |
| um05317   | 1 | 1 | NA      |       | NA      |       | NA        |       | NA        |         | NA           |       | UHOR_1255,   |       |
| um05318   | 1 | 1 | NA      |       | NA      |       | sr10075   | 2     | sr10075   | 2       | NA           |       | UHOR_12189]  | NS NS |
| um05319   | 1 | 1 | NA      |       | NA      |       | sr10073   | 1     | sr10073   | 1       | NA           |       | UHOR_10033   | 1     |
| um10558   |   |   | mp02624 | NS NS | mp02624 | NS NS | sr10071   | NS NS | sr10071   | NS NS   | UHOR_08135   | NS NS | UHOR_08135   | NS NS |

Um\_22A



|         |   |   |         |    |    |         |    |    |         |    |    |         |    |    |            |    |            |            |    |    |
|---------|---|---|---------|----|----|---------|----|----|---------|----|----|---------|----|----|------------|----|------------|------------|----|----|
| um11233 |   |   | mp02835 | NS | NS | mp02835 | NS | NS | sr11349 | NS | NS | sr11349 | NS | NS | UHOR_08817 | NS | NS         | UHOR_08817 | NS | NS |
| um06221 | 4 | 4 | NA      |    |    | NA      |    |    | NA      |    |    | NA      |    |    | UHOR_08818 | 1  | UHOR_08818 | 1          |    |    |
| um06222 | 1 | 1 | NA      |    |    | NA      |    |    | NA      |    |    | NA      |    |    | NA         |    | NA         |            |    |    |
| um06223 | 2 | 2 | NA      |    |    | NA      |    |    | NA      |    |    | NA      |    |    | NA         |    | NA         |            |    |    |
| um06224 |   |   | mp02841 | NS | NS | mp02841 | NS | NS | sr11356 | NS | NS | sr11356 | NS | NS | UHOR_08820 | NS | NS         | UHOR_08820 | NS | NS |

NS specifies non-secreted protein coding genes

NA specifies the absence of an orthologous gene

Grey shade highlights PSEP-encoding genes

SP and TP columns represent the SignalP v4 and TargetP v1.1 predicted PSEPs, respectively

OrthoMCL and Inparanoid columns represent the orthologous genes predicted by OrthoMCL and Inparanoid tools, respectively

Gene Ids in brackets are the gene Ids of paralogous genes.

Supplementary table 3. *Ustilago maydis* newly identified pathogenicity clusters and their orthologous genes in other genomes.

| <i>U.maydis</i>                                                                                                                                                                                                                               |    |    | <i>M. pennsylvanicum</i> |    |         |            | <i>S.reilianum</i> |    |                                                    |    |                      | <i>U.hordei</i>                        |    |                      |            |    |            |                             |              |        |            |    |    |
|-----------------------------------------------------------------------------------------------------------------------------------------------------------------------------------------------------------------------------------------------|----|----|--------------------------|----|---------|------------|--------------------|----|----------------------------------------------------|----|----------------------|----------------------------------------|----|----------------------|------------|----|------------|-----------------------------|--------------|--------|------------|----|----|
| Gene Ids                                                                                                                                                                                                                                      | SP | TP | OrthoMCL                 | SP | TP      | Inparanoid | SP                 | TP | OrthoMCL                                           | SP | TP                   | Inparanoid                             | SP | TP                   | OrthoMCL   | SP | TP         | Inparanoid                  | SP           | TP     |            |    |    |
| <b>Um_1A_1</b>                                                                                                                                                                                                                                |    |    |                          |    |         |            |                    |    |                                                    |    |                      |                                        |    |                      |            |    |            |                             |              |        |            |    |    |
| um00104                                                                                                                                                                                                                                       |    | 1  | mp02114                  |    | 1       | mp02114    |                    | 1  | sr11444                                            |    | 1                    | sr11444                                |    | 1                    | UHOR_00167 |    | 3          | NA                          |              |        |            |    |    |
| um00105                                                                                                                                                                                                                                       |    | 1  | mp02113                  |    | 1       | mp02113    |                    | 1  | sr11445                                            |    | 1                    | sr11445                                |    | 1                    | UHOR_00168 |    | 1          | UHOR_00168                  |              |        | 1          |    |    |
| um10023                                                                                                                                                                                                                                       |    | 5  | mp01976                  | NS | 4       | mp01976    | NS                 | 4  | sr11446                                            | NS | 5                    | sr11446                                | NS | 5                    | UHOR_00169 | NS | 5          | UHOR_00169                  | NS           |        | 5          |    |    |
| um10024                                                                                                                                                                                                                                       |    | 2  | mp02112                  |    | 2       | mp02112    |                    | 2  | sr11447                                            |    | 1                    | sr11447                                |    | 1                    | UHOR_00170 |    | 2          | UHOR_00170                  |              |        | 2          |    |    |
| <b>Um_1B_1</b>                                                                                                                                                                                                                                |    |    |                          |    |         |            |                    |    |                                                    |    |                      |                                        |    |                      |            |    |            |                             |              |        |            |    |    |
| um11443                                                                                                                                                                                                                                       |    | 2  | NA                       |    | NA      |            |                    |    | NA                                                 |    | NA                   |                                        |    |                      | UHOR_08916 |    |            | [UHOR_08915]                |              | 2 [ 1] |            |    |    |
| um00538                                                                                                                                                                                                                                       |    | 1  | mp02666                  |    | 1       | mp02666    |                    | 1  | sr11817                                            |    | 1                    | sr11817                                |    | 1                    | UHOR_00823 |    | 1          | UHOR_00823                  |              |        | 1          |    |    |
| um11444                                                                                                                                                                                                                                       |    | 1  | NA                       |    | NA      |            |                    |    | NA                                                 |    | NA                   |                                        |    |                      | UHOR_08916 |    | 2          | [UHOR_08915]                |              | 2 [ 1] |            |    |    |
| <b>Um_2A_1</b>                                                                                                                                                                                                                                |    |    |                          |    |         |            |                    |    |                                                    |    |                      |                                        |    |                      |            |    |            |                             |              |        |            |    |    |
| um01427                                                                                                                                                                                                                                       |    | 2  | mp01568                  |    | 2       | mp01568    |                    | 2  | NA                                                 |    | NA                   |                                        |    |                      | UHOR_02143 |    | 1          | UHOR_02143                  |              |        | 1          |    |    |
| um01428                                                                                                                                                                                                                                       | NS | 3  | mp01567                  | NS | 3       | mp01567    | NS                 | 3  | sr12494                                            | NS | NS                   | sr12494                                | NS | NS                   | UHOR_02144 | NS | 4          | UHOR_02144                  | NS           |        | 4          |    |    |
| um01429                                                                                                                                                                                                                                       | NS | 1  | NA                       |    | NA      |            |                    |    | sr12497                                            | NS | 3                    | sr12497                                | NS | 3                    | UHOR_02147 | NS | 1          | UHOR_02147                  | NS           |        | 1          |    |    |
| <b>Um_3A_1</b>                                                                                                                                                                                                                                |    |    |                          |    |         |            |                    |    |                                                    |    |                      |                                        |    |                      |            |    |            |                             |              |        |            |    |    |
| um01854                                                                                                                                                                                                                                       |    | 2  | mp02373                  |    | 2       | mp02373    |                    | 2  | sr10554                                            |    | 2                    | sr10554                                |    | 2                    | UHOR_02751 |    | 2          | UHOR_02751                  |              |        | 2          |    |    |
| um01855                                                                                                                                                                                                                                       |    | 3  | mp02372                  |    | 2       | mp02372    |                    | 2  | sr10555                                            |    | 1                    | sr10555                                |    | 1                    | UHOR_02752 |    | 1          | UHOR_02752                  |              |        | 1          |    |    |
| um01856                                                                                                                                                                                                                                       | NS | 4  | mp02313                  | NS | 3       | mp02313    | NS                 | 3  | sr10556                                            | NS | 2                    | sr10556                                | NS | 2                    | UHOR_02759 | NS | 4          | UHOR_02759                  | NS           |        | 4          |    |    |
| um01857                                                                                                                                                                                                                                       | NS | NS | mp02314                  | NS | NS      | mp02314    | NS                 | NS | sr10553.2                                          | NS | NS                   | sr10553.2                              | NS | NS                   | UHOR_02758 | NS | NS         | UHOR_02758                  | NS           | NS     |            |    |    |
| um01858                                                                                                                                                                                                                                       |    | 1  | mp02317                  |    | 4       | mp02317    |                    | 4  | NA                                                 |    | NA                   |                                        |    |                      | UHOR_02756 |    | 1          | UHOR_02756                  |              |        | 1          |    |    |
| <b>Um_5A_1</b>                                                                                                                                                                                                                                |    |    |                          |    |         |            |                    |    |                                                    |    |                      |                                        |    |                      |            |    |            |                             |              |        |            |    |    |
| um02134                                                                                                                                                                                                                                       |    | 2  | mp05657                  |    | 3       | mp05657    |                    | 3  | sr13360                                            |    | 5                    | sr13360                                |    | 5                    | UHOR_03533 |    | 3          | UHOR_03533                  |              |        | 3          |    |    |
| um02135                                                                                                                                                                                                                                       |    | 2  | NA                       |    | NA      |            |                    |    | NA                                                 |    | sr13362              |                                        | 4  | NA                   |            | NA |            | NA                          |              |        |            |    |    |
| um02136                                                                                                                                                                                                                                       |    | 4  | NA                       |    | NA      |            |                    |    | NA                                                 |    | sr13363              |                                        | 1  | NA                   |            | NA |            | NA                          |              |        |            |    |    |
| um02137                                                                                                                                                                                                                                       |    | 2  | NA                       |    | NA      |            |                    |    | NA                                                 |    | NA                   |                                        |    | NA                   |            | NA |            | NA                          |              |        |            |    |    |
| um02138                                                                                                                                                                                                                                       |    |    |                          |    |         |            |                    |    |                                                    |    |                      |                                        |    |                      |            |    |            |                             |              |        |            |    |    |
| [um11377.2,<br>um01796]                                                                                                                                                                                                                       |    | 1  | NA                       |    | mp05658 |            | 2                  | NA |                                                    |    | sr13364              |                                        | 1  | NA                   |            |    | UHOR_15387 | [UHOR_15725]                |              | 1 [1]  |            |    |    |
| um02139                                                                                                                                                                                                                                       |    |    |                          |    |         |            |                    |    |                                                    |    |                      |                                        |    |                      |            |    |            |                             |              |        |            |    |    |
| [um03314,<br>um03313,<br>um02140.2]                                                                                                                                                                                                           |    | 2  | mp05659                  |    | 2       | mp05671    |                    | 1  | sr13377                                            | NS | NS                   | sr13377                                | NS | NS                   | NA         |    |            | UHOR_15858                  | [UHOR_13170] |        | 1 [1]      |    |    |
| um02140.2                                                                                                                                                                                                                                     |    |    |                          |    |         |            |                    |    |                                                    |    |                      |                                        |    |                      |            |    |            |                             |              |        |            |    |    |
| [um02139,<br>um03314,<br>um3313]                                                                                                                                                                                                              |    | 1  | mp05659                  |    | 2       | mp05659    |                    | 2  | sr13377                                            | NS | NS                   | sr13377                                | NS | NS                   | NA         |    |            | UHOR_15858                  | [UHOR_13170] |        | 1 [1]      |    |    |
| um02141                                                                                                                                                                                                                                       |    | 1  | NA                       |    | NA      |            |                    |    | sr13382 [sr13380,<br>sr13381, sr13379,<br>sr13376] | NS | 1 [2,<br>1, 1,<br>1] | sr13382 [sr13380,<br>sr13379, sr13376] | NS | 1 [2,<br>1, 1,<br>1] | NA         |    | NA         |                             |              |        |            |    |    |
| <b>Um_5B_1</b>                                                                                                                                                                                                                                |    |    |                          |    |         |            |                    |    |                                                    |    |                      |                                        |    |                      |            |    |            |                             |              |        |            |    |    |
| um10076                                                                                                                                                                                                                                       |    | 1  | NA                       |    | NA      |            |                    |    | NA                                                 |    | NA                   |                                        |    |                      | NA         |    |            | UHOR_15323                  | NS           |        | 5          |    |    |
| um02229                                                                                                                                                                                                                                       |    | 1  | NA                       |    | NA      |            |                    |    | sr13418                                            |    | 1                    | sr13418                                |    | 1                    | UHOR_03665 |    | 1          | UHOR_03665                  |              |        | 1          |    |    |
| um02230                                                                                                                                                                                                                                       |    | 1  | NA                       |    | NA      |            |                    |    | sr13419                                            |    | 2                    | sr13419                                |    | 2                    | NA         |    | NA         |                             |              |        |            |    |    |
| um02231                                                                                                                                                                                                                                       |    | 1  | NA                       |    | NA      |            |                    |    | sr13420                                            |    | 1                    | sr13420                                |    | 1                    | NA         |    | NA         |                             |              |        |            |    |    |
| <b>Um_5C_1</b>                                                                                                                                                                                                                                |    |    |                          |    |         |            |                    |    |                                                    |    |                      |                                        |    |                      |            |    |            |                             |              |        |            |    |    |
| um02285                                                                                                                                                                                                                                       | NS | 2  | mp03251                  | NS | 2       | mp03251    | NS                 | 2  | sr13482                                            | NS | 3                    | sr13482                                | NS | 3                    | UHOR_03753 | NS | 3          | UHOR_03753                  | NS           |        | 3          |    |    |
| um02286                                                                                                                                                                                                                                       |    | 1  | NA                       |    | NA      |            |                    |    | sr13483                                            | NS | NS                   | sr13483                                | NS | NS                   | UHOR_03754 | NS | NS         | UHOR_03754                  | NS           | NS     |            |    |    |
| um11403                                                                                                                                                                                                                                       |    | 1  | mp03275                  |    | 1       | mp03275    |                    | 1  | sr13484                                            |    | 1                    | sr13484                                |    | 1                    | UHOR_03756 |    | 1          | UHOR_03756                  |              |        | 1          |    |    |
| <b>Um_5D_1</b>                                                                                                                                                                                                                                |    |    |                          |    |         |            |                    |    |                                                    |    |                      |                                        |    |                      |            |    |            |                             |              |        |            |    |    |
| um02293                                                                                                                                                                                                                                       |    | 2  | mp03254                  |    | 4       | mp03254    |                    | 4  | sr13490                                            |    | 1                    | sr13490                                |    | 1                    | UHOR_03765 |    | 1          | NA                          |              |        |            |    |    |
| um02294                                                                                                                                                                                                                                       |    | 1  | NA                       |    | NA      |            |                    |    | sr13491                                            |    | 1                    | sr13491                                |    | 1                    | NA         |    | NA         |                             |              |        |            |    |    |
| um02295                                                                                                                                                                                                                                       |    | 1  | NA                       |    | NA      |            |                    |    | NA                                                 |    | sr13492              |                                        | 2  | NA                   |            | NA |            | NA                          |              |        |            |    |    |
| um02296                                                                                                                                                                                                                                       |    | 1  | NA                       |    | NA      |            |                    |    | sr13493                                            |    | 1                    | sr13493                                |    | 1                    | NA         |    | NA         |                             |              |        |            |    |    |
| um02297                                                                                                                                                                                                                                       |    | 1  | NA                       |    | NA      |            |                    |    | sr13494                                            |    | 1                    | sr13494                                |    | 1                    | NA         |    | NA         |                             |              |        |            |    |    |
| um02298                                                                                                                                                                                                                                       |    | 2  | NA                       |    | NA      |            |                    |    | sr13495                                            |    | 1                    | sr13495                                |    | 1                    | UHOR_03786 |    | 1          | UHOR_03786                  |              |        | 1          |    |    |
| um02299                                                                                                                                                                                                                                       |    | 1  | NA                       |    | NA      |            |                    |    | sr13496                                            |    | 1                    | sr13496                                |    | 1                    | NA         |    | NA         |                             |              |        |            |    |    |
| <b>Um_5E_1</b>                                                                                                                                                                                                                                |    |    |                          |    |         |            |                    |    |                                                    |    |                      |                                        |    |                      |            |    |            |                             |              |        |            |    |    |
| um02504                                                                                                                                                                                                                                       | NS | 1  | NA                       |    | NA      |            |                    |    | sr13612                                            | NS | 1                    | sr13612                                | NS | 1                    | NA         |    | NA         |                             |              |        |            |    |    |
| um10169                                                                                                                                                                                                                                       |    |    |                          |    |         |            |                    |    |                                                    |    |                      |                                        |    |                      |            |    |            |                             |              |        |            |    |    |
| [um03636,<br>um00827,<br>um12058,<br>um11874,<br>um01443,<br>um04693,<br>um06356,<br>um06479,<br>um06351,<br>um03635,<br>um05621,<br>um04887,<br>um05066,<br>um04689,<br>um06505,<br>um11979,<br>um10981,<br>um11109,<br>um05436,<br>um06514] |    |    |                          |    |         |            |                    |    |                                                    |    |                      |                                        |    |                      |            |    |            |                             |              |        |            |    |    |
| um02506                                                                                                                                                                                                                                       | NS | 5  | mp04509                  | NS | NS      | mp04509    | NS                 | NS | sr14681                                            | NS | NS                   | NA                                     |    |                      | UHOR_07450 |    |            | [UHOR_03234,<br>UHOR_02119] | NS           | NS     | UHOR_13031 | NS | NS |
| [um00445]                                                                                                                                                                                                                                     |    | 1  | NA                       |    | NA      |            |                    |    | sr10115                                            |    | 2                    | NA                                     |    |                      | UHOR_00698 | NS | NS         | UHOR_00698                  | NS           | NS     |            |    |    |
| um02508                                                                                                                                                                                                                                       | NS | NS | mp01158                  | NS | NS      | mp01158    | NS                 | NS | sr10955                                            | NS | NS                   | sr10955                                | NS | NS                   | UHOR_04034 | NS | NS         | UHOR_04034                  | NS           | NS     |            |    |    |
| um11406                                                                                                                                                                                                                                       | NS | 5  | mp01159                  | NS | 3       | mp01159    | NS                 | 3  | sr10956                                            | NS | 4                    | sr10956                                | NS | 4                    | UHOR_04036 | NS | NS         | UHOR_04036                  | NS           | NS     |            |    |    |
| um02510                                                                                                                                                                                                                                       |    | 1  | NA                       |    | NA      |            |                    |    | sr10957                                            |    | 1                    | sr10957                                |    | 1                    | UHOR_04037 |    | 1          | UHOR_04037                  |              |        | 1          |    |    |
| um11407                                                                                                                                                                                                                                       |    |    |                          |    |         |            |                    |    |                                                    |    |                      |                                        |    |                      |            |    |            |                             |              |        |            |    |    |
| [um11407]                                                                                                                                                                                                                                     |    | 1  | mp01160                  |    | 1       | mp01160    |                    | 1  | sr10958                                            |    | 1                    | sr10958                                |    | 1                    | UHOR_04038 |    | 1          | UHOR_04038                  |              |        | 1          |    |    |
| <b>Um_7A_1</b>                                                                                                                                                                                                                                |    |    |                          |    |         |            |                    |    |                                                    |    |                      |                                        |    |                      |            |    |            |                             |              |        |            |    |    |
| um02851                                                                                                                                                                                                                                       |    | 1  | NA                       |    | NA      |            |                    |    | sr13898 [sr13902]                                  |    | 1 [1]                | sr13902                                |    | 1                    | UHOR_04494 |    | 1          | UHOR_04494                  |              |        | 1          |    |    |
| um02852                                                                                                                                                                                                                                       |    | 2  | NA                       |    | NA      |            |                    |    | sr13903                                            |    | 2                    | sr13903                                |    | 2                    | UHOR_04496 |    | 1          | UHOR_04496                  |              |        | 1          |    |    |
| um02853                                                                                                                                                                                                                                       |    | 1  | NA                       |    | NA      |            |                    |    | sr13904                                            |    | 1                    | sr13904                                |    | 1                    | NA         |    | NA         |                             |              |        |            |    |    |
| um02854                                                                                                                                                                                                                                       |    | 1  | NA                       |    | NA      |            |                    |    | NA                                                 |    | sr13905              |                                        | 2  | NA                   |            | NA |            | NA                          |              |        |            |    |    |
| um11484                                                                                                                                                                                                                                       |    | 1  | NA                       |    | NA      |            |                    |    | NA                                                 |    | NA                   |                                        |    | NA                   |            | NA |            | NA                          |              |        |            |    |    |



|                                                                                                                                                                                                                                                                                              |                                               |                                                |                                                          |                                           |                                                 |                                                                                                                                                                                                                                                          |                                                                                      |                                                            |                                                                    |                           |
|----------------------------------------------------------------------------------------------------------------------------------------------------------------------------------------------------------------------------------------------------------------------------------------------|-----------------------------------------------|------------------------------------------------|----------------------------------------------------------|-------------------------------------------|-------------------------------------------------|----------------------------------------------------------------------------------------------------------------------------------------------------------------------------------------------------------------------------------------------------------|--------------------------------------------------------------------------------------|------------------------------------------------------------|--------------------------------------------------------------------|---------------------------|
| um06178<br>[um06126,<br>um06180,<br>um06181,<br>um11250,<br>um06179]<br>um06179<br>[um06126,<br>um06180,<br>um06181,<br>um11250,<br>um06178]<br>um06180<br>[um06126,<br>um06178,<br>um06181,<br>um11250,<br>um06179]<br>um06181<br>[um06126,<br>um06178,<br>um06180,<br>um11250,<br>um06179] | 2<br><br>1<br><br>1<br><br>2                  | NA<br><br>NA<br><br>NA<br><br>NA               | NA<br><br>NA<br><br>NA<br><br>NA                         | NA<br><br>NA<br><br>NA<br><br>NA          | NA<br><br>NA<br><br>NA<br><br>NA                | UHOR_14902<br>[UHOR_08758,<br>UHOR_08757,<br>UHOR_12644]<br><br>UHOR_14902<br>[UHOR_08758,<br>UHOR_08757,<br>UHOR_12644]<br><br>UHOR_14902<br>[UHOR_08758,<br>UHOR_08757,<br>UHOR_12644]<br><br>UHOR_14902<br>[UHOR_08758,<br>UHOR_08757,<br>UHOR_12644] | 1 [1, 1,<br>1]<br><br>1 [1, 1,<br>1]<br><br>1 [1, 1,<br>1]<br><br>1 [1, 1,<br>1]     |                                                            |                                                                    |                           |
| <b>Um_11</b>                                                                                                                                                                                                                                                                                 |                                               |                                                |                                                          |                                           |                                                 |                                                                                                                                                                                                                                                          |                                                                                      |                                                            |                                                                    |                           |
| um00792<br>um00793<br>[um00794]<br>um00795                                                                                                                                                                                                                                                   | 1<br>1 [NS]<br>2                              | NA<br>NA<br>NA                                 | NA<br>NA<br>NA                                           | sr12084 [sr12085]<br>sr12086<br>sr12087   | 1[1]<br>1 sr12086<br>2 sr12087                  | 1<br>1<br>2                                                                                                                                                                                                                                              | UHOR_01209<br>[UHOR_01211]<br>UHOR_01209<br>[UHOR_01211]<br>UHOR_01210<br>UHOR_01210 | 1[1]<br><br>1<br>1                                         |                                                                    |                           |
| <b>Um_21</b>                                                                                                                                                                                                                                                                                 |                                               |                                                |                                                          |                                           |                                                 |                                                                                                                                                                                                                                                          |                                                                                      |                                                            |                                                                    |                           |
| um10565<br>um00874<br>um00876<br>um10568.2<br>um00878                                                                                                                                                                                                                                        | 1<br>NS 5<br>2<br>NS 3<br>NS 5                | mp00857<br>NA<br>mp00859<br>mp06340<br>mp00860 | 1 mp00857<br>NA<br>2 mp00859<br>NS NS NA<br>NS 4 mp00860 | 1<br>1<br>2<br>NS 3<br>NS 5               | sr12163<br>NA<br>sr12165<br>sr17063<br>sr12167  | 2 sr12163<br>NA<br>2 sr12165<br>3 sr17063<br>5 sr12167                                                                                                                                                                                                   | 2<br>2<br>NS 3<br>NS 5                                                               | UHOR_01315<br>NA<br>UHOR_01319<br>UHOR_17004<br>UHOR_01323 | 1 UHOR_01315<br>NA<br>2 UHOR_01319<br>3 UHOR_17004<br>5 UHOR_01323 | 1<br>2<br>NS 3<br>NS 5    |
| <b>Um_21I</b>                                                                                                                                                                                                                                                                                |                                               |                                                |                                                          |                                           |                                                 |                                                                                                                                                                                                                                                          |                                                                                      |                                                            |                                                                    |                           |
| um11839.2<br>um11840<br>um00882                                                                                                                                                                                                                                                              | 1<br>NS<br>1                                  | mp00862<br>mp00861<br>mp03838                  | 1 mp00862<br>NS NS mp00861<br>1 mp03838                  | 1<br>NS NS<br>2                           | sr12171<br>sr12172<br>sr12175                   | 1 sr12171<br>NS NS sr12172<br>2 sr12175                                                                                                                                                                                                                  | 1<br>NS NS<br>2                                                                      | UHOR_01328<br>UHOR_01329<br>UHOR_01332                     | 1 UHOR_01328<br>NS NS UHOR_01329<br>1 UHOR_01332                   | 1<br>NS NS<br>1           |
| <b>Um_31</b>                                                                                                                                                                                                                                                                                 |                                               |                                                |                                                          |                                           |                                                 |                                                                                                                                                                                                                                                          |                                                                                      |                                                            |                                                                    |                           |
| um01705<br>um11362<br>um01708                                                                                                                                                                                                                                                                | 2<br>1<br>NS 2                                | mp04177<br>NA<br>mp04072                       | 4 mp04177<br>NA<br>NS 3 mp04072                          | 4<br>NS 3                                 | sr12778<br>sr12780<br>sr12783                   | 2 sr12778<br>1 sr12780<br>NS 3 sr12783                                                                                                                                                                                                                   | 2<br>1<br>NS 3                                                                       | UHOR_02535<br>UHOR_02538<br>UHOR_02545                     | 2 UHOR_02535<br>1 UHOR_02538<br>NS 2 UHOR_02545                    | 2<br>1<br>NS 2            |
| <b>Um_31I</b>                                                                                                                                                                                                                                                                                |                                               |                                                |                                                          |                                           |                                                 |                                                                                                                                                                                                                                                          |                                                                                      |                                                            |                                                                    |                           |
| um01772<br>um01774<br>um01775                                                                                                                                                                                                                                                                | 1<br>2<br>NS 5                                | mp04147<br>mp04107<br>mp04108                  | 1 mp04147<br>2 mp04107<br>NS 4 mp04108                   | 1<br>2<br>NS 4                            | sr12850<br>sr12852<br>sr12853                   | 2 sr12850<br>1 sr12852<br>NS 5 sr12853                                                                                                                                                                                                                   | 2<br>1<br>NS 5                                                                       | UHOR_02636<br>UHOR_02638<br>UHOR_02640                     | 1 UHOR_02636<br>1 UHOR_02638<br>NS 5 UHOR_02640                    | 1<br>1<br>NS 5            |
| <b>Um_31II</b>                                                                                                                                                                                                                                                                               |                                               |                                                |                                                          |                                           |                                                 |                                                                                                                                                                                                                                                          |                                                                                      |                                                            |                                                                    |                           |
| um01894<br>um10268<br>um01897<br>um01898                                                                                                                                                                                                                                                     | NS 3<br>1<br>NS 3<br>1                        | NA<br>NA<br>mp04200<br>mp04202                 | mp04199<br>NA<br>NS NS mp04200<br>1 mp04202              | 3<br>NS NS<br>NS NS<br>1                  | NA<br>sr10618<br>sr10619<br>sr10621<br>sr10624  | 3<br>1 sr10618<br>2 sr10621<br>1 sr10624                                                                                                                                                                                                                 | 3<br>1<br>2<br>1                                                                     | NA<br>UHOR_02811<br>UHOR_02812<br>UHOR_02816<br>UHOR_02820 | UHOR_02811<br>1 UHOR_02812<br>2 UHOR_02816<br>1 UHOR_02820         | 2<br>1<br>2<br>1          |
| <b>Um_81</b>                                                                                                                                                                                                                                                                                 |                                               |                                                |                                                          |                                           |                                                 |                                                                                                                                                                                                                                                          |                                                                                      |                                                            |                                                                    |                           |
| um10380<br>um03138<br>um03140.2                                                                                                                                                                                                                                                              | NS 1<br>1<br>NS 1                             | mp02476<br>NA<br>mp02475                       | NS 1 mp02476<br>NA<br>NS 4 mp02475                       | NS 1<br>NS 4                              | sr11076<br>NA<br>sr11072                        | NS 1 sr11076<br>sr11075<br>1 sr11072                                                                                                                                                                                                                     | NS 1<br>1<br>1                                                                       | UHOR_04959<br>NA<br>UHOR_04902                             | NS 1 UHOR_04959<br>NA<br>1 UHOR_04902                              | NS 1<br>1<br>1            |
| <b>Um_81I</b>                                                                                                                                                                                                                                                                                |                                               |                                                |                                                          |                                           |                                                 |                                                                                                                                                                                                                                                          |                                                                                      |                                                            |                                                                    |                           |
| um11014<br>um12226<br>um11015<br>[um03372]                                                                                                                                                                                                                                                   | NS 4<br>2<br>3<br>[NS]                        | mp02452<br>NA<br>mp01260                       | NS NS mp02452<br>NA<br>NS NS mp01260                     | NS NS<br>NS NS                            | sr14367<br>sr14368<br>sr14371                   | NS 4 sr14367<br>1 sr14368<br>NS NS sr14370                                                                                                                                                                                                               | NS 4<br>1<br>NS NS                                                                   | UHOR_05230<br>UHOR_05232<br>UHOR_05234                     | NS 4 UHOR_05230<br>2 UHOR_05232<br>NS NS UHOR_05234                | NS 4<br>2<br>NS NS        |
| <b>Um_91</b>                                                                                                                                                                                                                                                                                 |                                               |                                                |                                                          |                                           |                                                 |                                                                                                                                                                                                                                                          |                                                                                      |                                                            |                                                                    |                           |
| um11064<br>um03392.2<br>um03393                                                                                                                                                                                                                                                              | NS 5<br>1<br>NS 4                             | NA<br>NA<br>NA                                 | NA<br>NA<br>NA                                           | NA<br>sr14504<br>NA                       | NA<br>2 sr14504<br>NA                           | 2<br>2                                                                                                                                                                                                                                                   | NA<br>NA<br>NA                                                                       | NA<br>NA<br>NA                                             | NA<br>NA<br>NA                                                     | NA<br>NA<br>NA            |
| <b>Um_131</b>                                                                                                                                                                                                                                                                                |                                               |                                                |                                                          |                                           |                                                 |                                                                                                                                                                                                                                                          |                                                                                      |                                                            |                                                                    |                           |
| um04637<br>um11540<br>um11541                                                                                                                                                                                                                                                                | NS 1<br>2<br>1                                | NA<br>mp05745<br>mp03463                       | NA<br>NS NS mp05745<br>1 1 mp03463                       | NS NS<br>NS NS<br>1 1                     | sr15521<br>sr15523<br>sr15524                   | NS 1 sr15521<br>1 sr15523<br>1 sr15524                                                                                                                                                                                                                   | NS 1<br>1<br>1                                                                       | UHOR_06669<br>NA<br>UHOR_06672                             | NS 1 UHOR_06669<br>NA<br>NS 1 UHOR_06672                           | NS 1<br>1<br>NS 1         |
| <b>Um_191</b>                                                                                                                                                                                                                                                                                |                                               |                                                |                                                          |                                           |                                                 |                                                                                                                                                                                                                                                          |                                                                                      |                                                            |                                                                    |                           |
| um05314<br>um10557<br>um05317<br>um05318<br>um05319                                                                                                                                                                                                                                          | 1<br>1<br>1<br>1<br>1                         | NA<br>NA<br>NA<br>NA<br>NA                     | NA<br>NA<br>NA<br>NA<br>NA                               | sr10069<br>NA<br>NA<br>sr10075<br>sr10073 | 1 sr10069<br>NA<br>NA<br>2 sr10075<br>1 sr10073 | 1<br>2<br>1                                                                                                                                                                                                                                              | NA<br>NA<br>NA<br>NA<br>UHOR_10033                                                   | NA<br>NA<br>NA<br>NA<br>UHOR_10033                         | NA<br>NA<br>NA<br>NA<br>1                                          | NA<br>NA<br>NA<br>NA<br>1 |
| <b>Um_211</b>                                                                                                                                                                                                                                                                                |                                               |                                                |                                                          |                                           |                                                 |                                                                                                                                                                                                                                                          |                                                                                      |                                                            |                                                                    |                           |
| um06126<br>[um06180,<br>um06181,<br>um06178,<br>um11250,<br>um06179]<br>um06127<br>[um06128]<br>um06128<br>[um06127]                                                                                                                                                                         | 2<br>[1, 2,<br>2, 1,<br>NS]<br>1 [1]<br>1 [1] | NA<br>NA<br>NA<br>NA                           | NA<br>NA<br>NA<br>NA                                     | NA<br>NA<br>NA<br>NA                      | NA<br>NA<br>NA<br>NA                            | NA<br>NA<br>NA<br>NA                                                                                                                                                                                                                                     | UHOR_08691<br>UHOR_08691                                                             | 1 UHOR_08691<br>1 UHOR_08691                               | 1<br>1                                                             |                           |

NS specifies the non-secreted protein coding genes

NA specifies the absence of an orthologous gene

Grey shade highlights the PSEPs genes

SP and TP columns represent the SignalP v4 and TargetP v1.1 predicted PSEPs, respectively

OrthoMCL and Inparanoid columns represent the orthologous genes predicted by OrthoMCL and Inparanoid tools respectively

Gene ids in brackets are the gene ids of paralogous genes

Pathogenicity cluster identifiers has been named according to this nomenclature: SpeciesName\_ChromosomeClusterNumber\_1

Clusters having letter as cluster number have been predicted by both of the "Three direct Neighbour" and "3kb Window based" methods  
Clusters having Roman numerals as cluster number have been predicted by the "3kb Window based" method  
"\_1" has been added to cluster identifier to distinguish the Ids from previously reported clusters

**Supplementary table 4. *Sporisorium reilianum* pathogenicity clusters and their orthologous genes in other genomes.**

| <i>S. reilianum</i>                 |    |    | <i>M. pennsylvanicum</i> |    |    |            | <i>U. hordei</i> |    |                                                 |    |    | <i>U. maydis</i>        |    |    |                   |    |       |                      |    |          |  |
|-------------------------------------|----|----|--------------------------|----|----|------------|------------------|----|-------------------------------------------------|----|----|-------------------------|----|----|-------------------|----|-------|----------------------|----|----------|--|
| Gene Ids                            | SP | TP | OrthoMCL                 | SP | TP | Inparanoid | SP               | TP | OrthoMCL                                        | SP | TP | Inparanoid              | SP | TP | OrthoMCL          | SP | TP    | Inparanoid           | SP | TP       |  |
| <b>Sr_1A</b>                        |    |    |                          |    |    |            |                  |    |                                                 |    |    |                         |    |    |                   |    |       |                      |    |          |  |
| sr11400 [sr13525, sr11401, sr11402] |    | 1  | NA                       |    |    | NA         |                  |    | NA                                              |    |    | NA                      |    |    | NA                |    |       | NA                   |    |          |  |
| sr11401 [sr13525, sr11400, sr11402] |    | 1  | NA                       |    |    | NA         |                  |    | NA                                              |    |    | NA                      |    |    | NA                |    |       | NA                   |    |          |  |
| sr11402 [sr13525, sr11401, sr11400] |    | 3  | NA                       |    |    | NA         |                  |    | NA                                              |    |    | NA                      |    |    | NA                |    |       | NA                   |    |          |  |
| sr11403                             | NS | 1  | mp02129                  | NS | 2  | mp02129    | NS               | 2  | UHOR_00116                                      | NS | 2  | UHOR_00116              | NS | 2  | um10017           | NS | 1     | um10017              | NS | 1        |  |
| <b>Sr_1B</b>                        |    |    |                          |    |    |            |                  |    |                                                 |    |    |                         |    |    |                   |    |       |                      |    |          |  |
| sr11444                             |    | 1  | mp02114                  |    | 1  | mp02114    |                  | 1  | UHOR_00167                                      |    | 3  | UHOR_00167              |    | 3  | um00104           |    | 1     | um00104              |    | 1        |  |
| sr11445                             |    | 1  | mp02113                  |    | 1  | mp02113    |                  | 1  | UHOR_00168                                      |    | 1  | UHOR_00168              |    | 1  | um00105           |    | 1     | um00105              |    | 1        |  |
| sr11446                             | NS | 5  | mp01976                  | NS | 4  | mp01976    | NS               | 4  | UHOR_00169                                      | NS | 5  | UHOR_00169              | NS | 5  | um10023           | NS | 5     | um10023              | NS | 5        |  |
| sr11447                             |    | 1  | mp02112                  |    | 2  | mp02112    |                  | 2  | UHOR_00170                                      |    | 2  | UHOR_00170              |    | 2  | um10024           |    | 2     | um10024              |    | 2        |  |
| <b>Sr_1C</b>                        |    |    |                          |    |    |            |                  |    |                                                 |    |    |                         |    |    |                   |    |       |                      |    |          |  |
| sr20004                             |    | 1  | NA                       |    |    | NA         |                  |    | NA                                              |    |    | NA                      |    |    | NA                |    |       | NA                   |    |          |  |
| sr10115                             |    | 2  | NA                       |    |    | NA         |                  |    | UHOR_00698                                      | NS | NS | UHOR_00698              | NS | NS | um00445 [um02506] |    | 1 [1] | um00445              |    | 1        |  |
| sr10116                             |    | 1  | NA                       |    |    | NA         |                  |    | UHOR_00702                                      |    | 1  | UHOR_00702              |    | 1  | um00446           |    | 1     | um00446              |    | 1        |  |
| <b>Sr_1D</b>                        |    |    |                          |    |    |            |                  |    |                                                 |    |    |                         |    |    |                   |    |       |                      |    |          |  |
| sr12084 [sr12085, sr12085 [sr12084] |    | 1  | NA                       |    |    | NA         |                  |    | UHOR_01209 [UHOR_01211] UHOR_01209 [UHOR_01211] |    | 1  | UHOR_01209 [UHOR_01211] |    | 1  | um00792           |    | 1     | um00792              |    | 1        |  |
| sr12086 [sr12087]                   |    | 1  | NA                       |    |    | NA         |                  |    | NA                                              |    |    | NA                      |    |    | um00793 [um00794] |    | 1     | um00793 [um00794]    |    | 1        |  |
| sr12087                             |    | 2  | NA                       |    |    | NA         |                  |    | UHOR_01210                                      |    | 1  | UHOR_01210              |    | 1  | um00795           |    | 2     | um00795              |    | 2        |  |
| <b>Sr_2A</b>                        |    |    |                          |    |    |            |                  |    |                                                 |    |    |                         |    |    |                   |    |       |                      |    |          |  |
| sr10309 [sr10310]                   |    | 1  | NA                       |    |    | NA         |                  |    | NA                                              |    |    | UHOR_01863              |    | 1  | um01235           |    | 1     | um01235              |    | 1        |  |
| sr10310 [sr10309]                   |    | 1  | NA                       |    |    | NA         |                  |    | NA                                              |    |    | UHOR_01863              |    | 1  | um01235           |    | 1     | um01235              |    | 1        |  |
| sr10311 [sr10312]                   |    | 1  | mp05069                  | NS | NS | mp05069    | NS               | NS | UHOR_01866                                      | NS | NS | UHOR_01866              | NS | NS | um01236 [um01236] |    | 2 [2] | um01236              |    | 2        |  |
| sr10312 [sr10311]                   |    | 2  | mp05069                  | NS | NS | NA         |                  |    | UHOR_01866                                      | NS | NS | UHOR_01866              | NS | NS | um01237 [um01237] |    | 2 [2] | um01237              |    | 2        |  |
| sr10313                             |    | 1  | NA                       |    |    | NA         |                  |    | NA                                              |    |    | NA                      |    |    | NA                |    |       | NA                   |    |          |  |
| sr10314                             |    | 2  | NA                       |    |    | NA         |                  |    | NA                                              |    |    | NA                      |    |    | NA                |    |       | NA                   |    |          |  |
| sr10315                             |    | 1  | NA                       |    |    | NA         |                  |    | NA                                              |    |    | NA                      |    |    | NA                |    |       | NA                   |    |          |  |
| sr10316 [sr10317]                   |    | 2  | NA                       |    |    | NA         |                  |    | NA                                              |    |    | NA                      |    |    | um01240 [um01239] |    | 1 [1] | um01240 [um01239]    |    | 1 [1]    |  |
| sr10317 [sr10316]                   |    | 1  | NA                       |    |    | NA         |                  |    | NA                                              |    |    | NA                      |    |    | um01239           |    |       | NA                   |    |          |  |
| sr10318                             |    | 2  | mp05068                  |    | 1  | mp05068    |                  | 1  | NA                                              |    |    | NA                      |    |    | um01240 [um01240] |    | 1 [1] | NA                   |    |          |  |
| um01241                             |    |    |                          |    |    |            |                  |    | NA                                              |    |    | NA                      |    |    | um01241           |    | 4     | um01241              |    | 4        |  |
| <b>Sr_2B</b>                        |    |    |                          |    |    |            |                  |    |                                                 |    |    |                         |    |    |                   |    |       |                      |    |          |  |
| sr10431.2                           |    | 1  | NA                       |    |    | NA         |                  |    | UHOR_01950                                      | NS | NS | UHOR_01950              | NS | NS | um01299           |    | 1     | um01299              |    | 1        |  |
| sr10432.2                           |    | 1  | NA                       |    |    | NA         |                  |    | NA                                              |    |    | NA                      |    |    | um01301           |    | 2     | um01301              |    | 2        |  |
| sr20001                             |    | 1  | NA                       |    |    | NA         |                  |    | NA                                              |    |    | NA                      |    |    | um01302           |    | 1     | um01302              |    | 1        |  |
| sr10433                             |    | 1  | NA                       |    |    | NA         |                  |    | NA                                              |    |    | NA                      |    |    | NA                |    |       | NA                   |    |          |  |
| <b>Sr_3A</b>                        |    |    |                          |    |    |            |                  |    |                                                 |    |    |                         |    |    |                   |    |       |                      |    |          |  |
| sr12850                             |    | 2  | mp04147                  |    | 1  | mp04147    |                  | 1  | UHOR_02636                                      |    | 1  | UHOR_02636              |    | 1  | um01772           |    | 1     | um01772              |    | 1        |  |
| sr12851                             | NS | NS | mp04146                  | NS | NS | mp04146    | NS               | NS | UHOR_02639                                      | NS | NS | UHOR_02639              | NS | NS | um01773           | NS | NS    | um01773              | NS | NS       |  |
| sr12852                             |    | 1  | mp04107                  |    | 2  | mp04107    |                  | 2  | UHOR_02638                                      |    | 1  | UHOR_02638              |    | 1  | um01774           |    | 2     | um01774              |    | 2        |  |
| sr12853                             | NS | 5  | mp04108                  | NS | 4  | mp04108    | NS               | 4  | UHOR_02640                                      | NS | 5  | UHOR_02640              | NS | 5  | um01775           | NS | 5     | um01775              | NS | 5        |  |
| sr12854                             | NS | NS | mp04145                  | NS | NS | mp04145    | NS               | NS | UHOR_02641                                      | NS | NS | UHOR_02641              | NS | NS | um01776           | NS | NS    | um01776              | NS | NS       |  |
| sr12855                             | NS | 5  | mp04144                  | NS | NS | mp04144    | NS               | NS | UHOR_02643                                      | NS | NS | UHOR_02643              | NS | NS | um01777           | NS | NS    | um01777              | NS | NS       |  |
| sr12856                             |    | 2  | NA                       |    |    | NA         |                  |    | NA                                              |    |    | NA                      |    |    | NA                |    |       | NA                   |    |          |  |
| sr12857                             |    | 1  | NA                       |    |    | NA         |                  |    | NA                                              |    |    | UHOR_02647              |    | 2  | NA                |    |       | um01779              |    | 1        |  |
| <b>Sr_3B</b>                        |    |    |                          |    |    |            |                  |    |                                                 |    |    |                         |    |    |                   |    |       |                      |    |          |  |
| sr10554                             |    | 2  | mp02373                  |    | 2  | mp02373    |                  | 2  | UHOR_02751                                      |    | 2  | UHOR_02751              |    | 2  | um01854           |    | 2     | um01854              |    | 2        |  |
| sr10555                             |    | 1  | mp02372                  |    | 2  | mp02372    |                  | 2  | UHOR_02752                                      |    | 1  | UHOR_02752              |    | 1  | um01855           |    | 3     | um01855              |    | 3        |  |
| sr10556                             | NS | 2  | mp02313                  | NS | 3  | mp02313    | NS               | 3  | UHOR_02759                                      | NS | 4  | UHOR_02759              | NS | 4  | um01856           | NS | 4     | um01856              | NS | 4        |  |
| <b>Sr_5A</b>                        |    |    |                          |    |    |            |                  |    |                                                 |    |    |                         |    |    |                   |    |       |                      |    |          |  |
| sr13341                             |    | 1  | NA                       |    |    | NA         |                  |    | NA                                              |    |    | NA                      |    |    | NA                |    |       | NA                   |    |          |  |
| sr13342                             |    | 1  | NA                       |    |    | NA         |                  |    | NA                                              |    |    | NA                      |    |    | NA                |    |       | NA                   |    |          |  |
| sr13343                             |    | 1  | NA                       |    |    | NA         |                  |    | NA                                              |    |    | NA                      |    |    | NA                |    |       | NA                   |    |          |  |
| sr13344                             |    | 1  | NA                       |    |    | NA         |                  |    | NA                                              |    |    | NA                      |    |    | um02119           |    | 1     | um02119              |    | 1        |  |
| sr13345                             |    | 1  | mp05677                  |    | 1  | mp05677    |                  | 1  | UHOR_03512                                      |    | 1  | UHOR_03512              |    | 1  | um10055           |    | 1     | um10055              |    | 1        |  |
| <b>Sr_5B</b>                        |    |    |                          |    |    |            |                  |    |                                                 |    |    |                         |    |    |                   |    |       |                      |    |          |  |
| sr13360                             |    | 5  | mp05657                  |    | 1  | mp05657    |                  | 1  | UHOR_03533                                      |    | 3  | UHOR_03533              |    | 3  | um02134           |    | 2     | um02134              |    | 2        |  |
| sr13361                             |    | 3  | NA                       |    |    | NA         |                  |    | NA                                              |    |    | NA                      |    |    | NA                |    |       | NA                   |    |          |  |
| sr13362                             |    | 4  | NA                       |    |    | NA         |                  |    | NA                                              |    |    | NA                      |    |    | um02135           |    |       | um02135              |    | 2        |  |
| sr13363                             |    | 1  | NA                       |    |    | NA         |                  |    | NA                                              |    |    | UHOR_03536              |    | 1  | NA                |    |       | um02136              |    | 4        |  |
| sr13364                             |    | 1  | NA                       |    |    | NA         |                  |    | NA                                              |    |    | NA                      |    |    | NA                |    |       | [um11377.2, um01796] |    | 1 [1, 2] |  |
| sr13365                             |    | 1  | NA                       |    |    | NA         |                  |    | NA                                              |    |    | NA                      |    |    | NA                |    |       | NA                   |    |          |  |
| sr13366                             | NS | NS | NA                       |    |    | NA         |                  |    | NA                                              |    |    | NA                      |    |    | NA                |    |       | NA                   |    |          |  |
| sr13367 [sr13374, sr13375]          |    | 2  | NA                       |    |    | mp05658    |                  | 2  | NA                                              |    |    | NA                      |    |    | NA                |    |       | NA                   |    |          |  |
| <b>Sr_5C</b>                        |    |    |                          |    |    |            |                  |    |                                                 |    |    |                         |    |    |                   |    |       |                      |    |          |  |
| sr13384                             |    | 1  | mp05668                  | NS | 1  | mp05668    | NS               | 1  | UHOR_03555                                      | NS | 1  | UHOR_03555              | NS | 1  | um02157           | NS | 2     | um02157              | NS | 2        |  |

|                                      |    |    |                   |    |    |                   |    |    |                                                 |    |    |                                     |    |    |                               |         |    |           |         |    |           |
|--------------------------------------|----|----|-------------------|----|----|-------------------|----|----|-------------------------------------------------|----|----|-------------------------------------|----|----|-------------------------------|---------|----|-----------|---------|----|-----------|
| sr13383                              | NS | NS | mp05669           | NS | NS | mp05669           | NS | NS | UHOR_03556                                      | NS | NS | UHOR_03556                          | NS | NS | um02142                       | NS      | NS | um02142   | NS      | NS |           |
| sr13382                              |    |    |                   |    |    |                   |    |    |                                                 |    |    |                                     |    |    |                               |         |    |           |         |    |           |
| [sr13380, sr13381, sr13379, sr13376] |    | 1  | NA                |    |    | NA                |    |    | NA                                              |    |    | NA                                  |    |    | um02141                       |         | 1  | um02141   |         | 1  |           |
| sr13381                              |    |    |                   |    |    |                   |    |    |                                                 |    |    |                                     |    |    |                               |         |    |           |         |    |           |
| [sr13380, sr13382, sr13381, sr13379] |    | 1  | NA                |    |    | NA                |    |    | NA                                              |    |    | NA                                  |    |    | um02141                       |         | 1  | NA        |         |    |           |
| sr13380                              |    |    |                   |    |    |                   |    |    |                                                 |    |    |                                     |    |    |                               |         |    |           |         |    |           |
| [sr13376, sr13382, sr13381, sr13379] |    | 2  | NA                |    |    | NA                |    |    | NA                                              |    |    | NA                                  |    |    | um02141                       |         | 1  | um02141   |         | 1  |           |
| sr13379                              |    |    |                   |    |    |                   |    |    |                                                 |    |    |                                     |    |    |                               |         |    |           |         |    |           |
| [sr13376, sr13382, sr13381, sr13380] |    | 1  | NA                |    |    | NA                |    |    | NA                                              |    |    | NA                                  |    |    | um02141                       |         | 1  | um02141   |         | 1  |           |
| sr13378                              | NS | NS | NA                |    |    | NA                |    |    | NA                                              |    |    | NA                                  |    |    | um02141                       |         | 1  | um02141   |         | 1  |           |
|                                      |    |    |                   |    |    |                   |    |    |                                                 |    |    |                                     |    |    | NA                            |         |    | NA        |         |    |           |
|                                      |    |    |                   |    |    |                   |    |    |                                                 |    |    |                                     |    |    | um02139                       |         |    | um02139   |         |    |           |
|                                      |    |    |                   |    |    |                   |    |    |                                                 |    |    |                                     |    |    | [um03314, um03313, um02140.2] |         | 2  | [1, 1, 1] |         | 2  |           |
|                                      |    |    |                   |    |    |                   |    |    |                                                 |    |    |                                     |    |    |                               |         |    |           |         |    |           |
| sr13377                              | NS | NS | mp05659           |    | 2  | mp05659           |    | 2  | NA                                              |    |    | UHOR_15858 [UHOR_15857, UHOR_13170] |    | 1  | [NS, 1]                       |         |    |           |         | 2  | [1, 1, 1] |
| sr13376                              |    |    |                   |    |    |                   |    |    |                                                 |    |    |                                     |    |    |                               |         |    |           |         |    |           |
| [sr13379, sr13382, sr13381, sr13380] |    | 1  | NA                |    |    | NA                |    |    | NA                                              |    |    | NA                                  |    |    | um02141                       |         | 1  | um02141   |         | 1  |           |
| sr13375                              |    |    |                   |    |    |                   |    |    |                                                 |    |    |                                     |    |    |                               |         |    |           |         |    |           |
| [sr13367, sr13374]                   |    | 5  | NA                |    |    | NA                |    |    | NA                                              |    |    | NA                                  |    |    | NA                            |         |    | NA        |         |    |           |
| sr13374                              |    |    |                   |    |    |                   |    |    |                                                 |    |    |                                     |    |    |                               |         |    |           |         |    |           |
| [sr13367, sr13375]                   |    | 1  | NA                |    |    | NA                |    |    | NA                                              |    |    | NA                                  |    |    | NA                            |         |    | NA        |         |    |           |
| sr13373                              | NS | 4  | NA                |    |    | NA                |    |    | UHOR_03541                                      | NS | NS | UHOR_03541                          | NS | NS | um02147                       | NS      |    | um02147   | NS      | 3  |           |
| Sr_5D                                |    |    |                   |    |    |                   |    |    |                                                 |    |    |                                     |    |    |                               |         |    |           |         |    |           |
| sr10766                              |    | 1  | NA                |    |    | NA                |    |    | NA                                              |    |    | NA                                  |    |    | NA                            |         |    | um02192   |         | 1  |           |
| sr10767                              |    | 1  | NA                |    |    | NA                |    |    | NA                                              |    |    | NA                                  |    |    | NA                            |         |    | NA        |         |    |           |
| sr10769                              | NS | 5  | mp05143           | NS | 5  | mp05143           | NS | 5  | UHOR_03615                                      | NS | NS | UHOR_03615                          | NS | NS | um10070                       | NS      | 2  | um10070   | NS      | 2  |           |
|                                      |    |    |                   |    |    |                   |    |    | UHOR_03616 [UHOR_12270, UHOR_04380, UHOR_12275] |    |    |                                     |    |    |                               |         |    |           |         |    |           |
| sr10770                              |    | 1  | mp05158           |    | 1  | NA                |    |    | NS                                              | NS | NA |                                     |    |    | um02196                       |         | 1  | NA        |         |    |           |
| Sr_5E                                |    |    |                   |    |    |                   |    |    |                                                 |    |    |                                     |    |    |                               |         |    |           |         |    |           |
| sr13422                              | NS | 2  | NA                |    |    | NA                |    |    | UHOR_03667                                      | NS | NS | UHOR_03667                          | NS | NS | NA                            |         |    | NA        |         |    |           |
| sr13421                              | NS | NS | NA                |    |    | NA                |    |    | NA                                              |    |    | NA                                  |    |    | NA                            |         |    | NA        |         |    |           |
| sr13420                              |    | 1  | NA                |    |    | NA                |    |    | NA                                              |    |    | NA                                  |    |    | um02231                       |         | 1  | um02231   |         | 1  |           |
| sr13419                              |    | 2  | NA                |    |    | NA                |    |    | NA                                              |    |    | NA                                  |    |    | um02230                       |         | 1  | um02230   |         | 1  |           |
| sr13418                              |    | 1  | NA                |    |    | NA                |    |    | UHOR_03665                                      |    | 1  | UHOR_03665                          |    | 1  | um02229                       |         | 1  | um02229   |         | 1  |           |
| Sr_5F                                |    |    |                   |    |    |                   |    |    |                                                 |    |    |                                     |    |    |                               |         |    |           |         |    |           |
| sr16550                              |    | 1  | mp02910 [mp03261] |    | 4  | mp02910 [mp03261] |    | 4  | UHOR_03683                                      | NS | 3  | UHOR_03683                          | NS | 3  | um05927                       |         | 1  | um05927   |         | 1  |           |
|                                      |    |    |                   |    |    |                   |    |    | UHOR_03684                                      |    | 1  | UHOR_15327                          |    | 1  | um05928                       |         | 1  | um05928   |         | 1  |           |
| sr16551                              |    | 2  | NA                |    |    | NA                |    |    | [UHOR_15327]                                    |    |    | NA                                  |    |    | NA                            |         |    | NA        |         |    |           |
| sr16552                              |    | 2  | NA                |    |    | NA                |    |    | NA                                              |    |    | NA                                  |    |    | um05930                       |         | 1  | um05930   |         | 1  |           |
| sr16553                              |    | 1  | NA                |    |    | NA                |    |    | UHOR_03426                                      |    | 2  | UHOR_03426                          |    | 2  | NA                            |         |    | NA        |         |    |           |
| sr16554                              |    | 1  | NA                |    |    | NA                |    |    | NA                                              |    |    | NA                                  |    |    | um05931                       |         | 1  | um05931   |         | 1  |           |
| sr16555                              |    | 1  | NA                |    |    | NA                |    |    | NA                                              |    |    | NA                                  |    |    | NA                            |         |    | um02746   |         | NS |           |
| sr16556                              | NS | NS | NA                |    |    | NA                |    |    | UHOR_03466                                      | NS | NS | NA                                  |    |    | um02745                       | NS      | NS | NA        |         | NS |           |
| sr16557                              | NS | NS | NA                |    |    | NA                |    |    |                                                 |    |    |                                     |    |    |                               |         |    |           |         |    |           |
| sr16558                              |    |    |                   |    |    |                   |    |    |                                                 |    |    |                                     |    |    |                               |         |    |           |         |    |           |
| [sr16559, sr16560, sr16561]          |    | 2  | NA                |    |    | mp06108           |    | 1  | NA                                              |    |    | UHOR_06592 [UHOR_15322]             |    | 2  | [1]                           | um05932 |    | 1         | um05932 |    | 1         |
| sr16559                              |    |    |                   |    |    |                   |    |    |                                                 |    |    |                                     |    |    |                               |         |    |           |         |    |           |
| [sr16558, sr16560, sr16561]          |    | 1  | NA                |    |    | mp06108           |    | 1  | NA                                              |    |    | UHOR_06592 [UHOR_15322]             |    | 2  | [1]                           | um05932 |    | 1         | um05932 |    | 1         |
| sr16560                              |    |    |                   |    |    |                   |    |    |                                                 |    |    |                                     |    |    |                               |         |    |           |         |    |           |
| [sr16559, sr16558, sr16561]          |    | 1  | NA                |    |    | mp06108           |    | 1  | NA                                              |    |    | UHOR_06592 [UHOR_15322]             |    | 2  | [1]                           | um05932 |    | 1         | um05932 |    | 1         |
| sr16561                              |    |    |                   |    |    |                   |    |    |                                                 |    |    |                                     |    |    |                               |         |    |           |         |    |           |
| [sr16559, sr16560, sr16558]          |    | 1  | NA                |    |    | mp06108           |    | 1  | NA                                              |    |    | UHOR_06592 [UHOR_15322]             |    | 2  | [1]                           | um05932 |    | 1         | um05932 |    | 1         |
| Sr_6A                                |    |    |                   |    |    |                   |    |    |                                                 |    |    |                                     |    |    |                               |         |    |           |         |    |           |
| sr10956                              | NS | 4  | mp01159           | NS | 3  | mp01159           | NS | 3  | UHOR_04036                                      | NS | NS | UHOR_04036                          | NS | NS | um11406                       | NS      | 5  | um11406   | NS      | 5  |           |
| sr10957                              |    | 1  | NA                |    |    | NA                |    |    | UHOR_04037                                      |    | 1  | UHOR_04037                          |    | 1  | um02510                       |         | 1  | um02510   |         | 1  |           |
| sr10958                              |    | 1  | mp01160           |    | 1  | mp01160           |    | 1  | UHOR_04038                                      |    | 1  | UHOR_04038                          |    | 1  | um11407                       |         | 1  | um11407   |         | 1  |           |
| Sr_6B                                |    |    |                   |    |    |                   |    |    |                                                 |    |    |                                     |    |    |                               |         |    |           |         |    |           |
| sr10994.2                            |    | 1  | NA                |    |    | NA                |    |    | NA                                              |    |    | NA                                  |    |    | um02533                       |         | 2  | um02533   |         | 2  |           |
| sr10995.2                            |    | 1  | NA                |    |    | NA                |    |    | NA                                              |    |    | NA                                  |    |    | NA                            |         |    | NA        |         |    |           |
| sr20006                              |    | 1  | NA                |    |    | NA                |    |    | NA                                              |    |    | NA                                  |    |    | um11415                       |         | 2  | um11415   |         | 2  |           |
| sr10996.2                            |    | 1  | NA                |    |    | NA                |    |    | UHOR_12257                                      |    | 1  | UHOR_12257                          |    | 1  | um02535                       |         | 1  | um02535   |         | 1  |           |
| sr10997.2                            |    | 2  | NA                |    |    | NA                |    |    | NA                                              |    |    | NA                                  |    |    | NA                            |         |    | um11416   |         | 1  |           |
| sr10998.2                            | NS | 1  | NA                |    |    | NA                |    |    | NA                                              |    |    | NA                                  |    |    | NA                            |         |    | NA        |         |    |           |
| sr20007                              |    | 3  | NA                |    |    | NA                |    |    | NA                                              |    |    | NA                                  |    |    | um02538                       |         | 1  | um02538   |         | 1  |           |
| sr11000.2                            |    |    |                   |    |    |                   |    |    |                                                 |    |    |                                     |    |    |                               |         |    |           |         |    |           |
| [sr11000.2]                          |    | 1  | NA                |    |    | NA                |    |    | NA                                              |    |    | NA                                  |    |    | um11417                       |         | 1  | um11417   |         | 1  |           |
| sr11002.2                            |    |    |                   |    |    |                   |    |    |                                                 |    |    |                                     |    |    |                               |         |    |           |         |    |           |
| [sr11008.2, sr11006, sr11003]        |    | 1  | NA                |    |    | NA                |    |    | NA                                              |    |    | NA                                  |    |    | NA                            |         |    | NA        |         |    |           |
| sr11003                              |    |    |                   |    |    |                   |    |    |                                                 |    |    |                                     |    |    |                               |         |    |           |         |    |           |
| [sr11008.2, sr11006, sr11002.2]      |    | 1  | NA                |    |    | NA                |    |    | NA                                              |    |    | NA                                  |    |    | NA                            |         |    | NA        |         |    |           |
| sr11004                              |    |    |                   |    |    |                   |    |    |                                                 |    |    |                                     |    |    |                               |         |    |           |         |    |           |
| [sr17058, sr16641, sr17412]          | NS | NS | mp06294           | NS | NS | mp06294           | NS | NS | NA                                              |    |    | UHOR_16530                          | NS | NS | NA                            |         |    | NA        |         |    |           |
| sr11005                              |    |    |                   |    |    |                   |    |    |                                                 |    |    |                                     |    |    |                               |         |    |           |         |    |           |
| [sr16642]                            | NS | NS | NA                |    |    | NA                |    |    | NA                                              |    |    | NA                                  |    |    | um02816                       | NS      | NS | NA        |         |    |           |



|                                                                                                                                              |      |                            |                            |                             |                                           |                             |           |       |           |
|----------------------------------------------------------------------------------------------------------------------------------------------|------|----------------------------|----------------------------|-----------------------------|-------------------------------------------|-----------------------------|-----------|-------|-----------|
| sr11006<br>[sr11002.2,<br>sr11008.2,<br>sr11003]<br>sr11008.2<br>[sr11002.2,<br>sr11006,<br>sr11003]                                         | 1    | NA                         | NA                         | NA                          | NA                                        | NA                          | NA        | NA    | NA        |
| sr11009                                                                                                                                      | 1    | NA<br>mp01109<br>[mp05408] | NA<br>mp01109<br>[mp05408] | 1                           | NA                                        | NA                          | um02540   | 1     | um02540   |
| <b>Sr_6C</b>                                                                                                                                 |      |                            |                            |                             |                                           |                             |           |       |           |
| sr13833                                                                                                                                      | 4    | NA                         | NA                         | UHOR_04718                  | 2                                         | UHOR_04718                  | 2         | NA    | NA        |
| sr13834                                                                                                                                      | 1    | NA                         | NA                         | NA                          | NA                                        | NA                          | NA        | NA    | NA        |
| sr13835                                                                                                                                      | 1    | NA                         | NA                         | NA                          | NA                                        | NA                          | NA        | NA    | NA        |
| sr13836                                                                                                                                      | 1    | NA                         | NA                         | NA                          | NA                                        | NA                          | NA        | NA    | NA        |
| <b>Sr_7A</b>                                                                                                                                 |      |                            |                            |                             |                                           |                             |           |       |           |
| sr13900                                                                                                                                      | 1    | NA                         | NA                         | NA                          | NA                                        | NA                          | NA        | NA    | NA        |
| sr13901                                                                                                                                      | 1    | NA                         | NA                         | NA                          | NA                                        | NA                          | NA        | NA    | NA        |
| sr13902<br>[sr13898]                                                                                                                         | 1    | NA                         | NA                         | UHOR_04494                  | 1                                         | NA                          | um02851   | 1     | um02851   |
| sr13903                                                                                                                                      | 2    | NA                         | NA                         | UHOR_04496                  | 1                                         | UHOR_04496                  | um02852   | 2     | um02852   |
| sr13904                                                                                                                                      | 1    | NA                         | NA                         | NA                          | NA                                        | NA                          | um02853   | 1     | um02853   |
| sr13905                                                                                                                                      | 2    | NA                         | NA                         | NA                          | NA                                        | NA                          | um02854   | 1     | um02854   |
| sr13906                                                                                                                                      | 2    | NA                         | NA                         | NA                          | NA                                        | NA                          | NA        | NA    | NA        |
| <b>Sr_8A</b>                                                                                                                                 |      |                            |                            |                             |                                           |                             |           |       |           |
| sr11100                                                                                                                                      | 1    | NA                         | NA                         | UHOR_04984                  | 1                                         | UHOR_04984                  | um03201   | 2     | um03201   |
| sr11101                                                                                                                                      | 1    | NA                         | NA                         | UHOR_04986                  | 1                                         | UHOR_04986                  | um03202   | 1     | um03202   |
| [sr11102]                                                                                                                                    | 1    | NA                         | NA                         | UHOR_04986                  | 1                                         | UHOR_04986                  | [um10403] | 1     | [um10403] |
| sr11102                                                                                                                                      | 1    | NA                         | NA                         | UHOR_04986                  | 1                                         | NA                          | um03202   | 1     | um03202   |
| [sr11101]                                                                                                                                    | 1    | NA                         | NA                         | UHOR_04986                  | 1                                         | NA                          | [um10403] | 1     | [um10403] |
| <b>Sr_8B</b>                                                                                                                                 |      |                            |                            |                             |                                           |                             |           |       |           |
| sr11130<br>[sr11132,<br>sr11133,<br>sr02614]<br>sr11132<br>[sr11130,<br>sr11133,<br>sr02614]<br>sr11133<br>[sr11130,<br>sr11132,<br>sr02614] | 1    | NA                         | NA                         | NA                          | NA                                        | NA                          | NA        | NA    | NA        |
| sr02613<br>sr02614<br>[sr11130,<br>sr11132,<br>sr11133]                                                                                      | 1    | NA                         | NA                         | NA                          | NA                                        | NA                          | NA        | NA    | NA        |
| <b>Sr_8C</b>                                                                                                                                 |      |                            |                            |                             |                                           |                             |           |       |           |
| sr14220                                                                                                                                      | 1    | NA                         | NA                         | UHOR_04675                  | 1                                         | UHOR_04675                  | um03223   | 1     | um03223   |
| sr14221                                                                                                                                      | 4    | NA                         | NA                         | UHOR_15214                  | 1                                         | UHOR_15214                  | um12215   | 1     | um12215   |
| sr14222                                                                                                                                      | 1    | NA                         | NA                         | UHOR_04676                  | 1                                         | UHOR_04676                  | um12216   | 1     | um12216   |
| sr14223                                                                                                                                      | 1    | NA                         | NA                         | [UHOR_04923,<br>UHOR_04922] | 1                                         | [UHOR_04923,<br>UHOR_04922] | NA        | 1     | NA        |
| <b>Sr_8D</b>                                                                                                                                 |      |                            |                            |                             |                                           |                             |           |       |           |
| sr14380                                                                                                                                      | 1    | mp01258                    | 1                          | mp01258                     | 1                                         | UHOR_05247                  | um03381   | 1     | um03381   |
| sr14381                                                                                                                                      | 2    | mp01259                    | 4                          | mp01259                     | 4                                         | UHOR_05245                  | um03382   | 2     | um03382   |
| sr14382                                                                                                                                      | NS 3 | mp01254                    | NS 3                       | mp01254                     | NS 3                                      | NA                          | um03383   | NS 3  | um03383   |
| <b>Sr_9A</b>                                                                                                                                 |      |                            |                            |                             |                                           |                             |           |       |           |
| sr14385<br>[sr14386]<br>sr14386<br>[sr14385]<br>sr14387                                                                                      | 4    | NA                         | NA                         | UHOR_05259                  | 2                                         | UHOR_05259                  | um03397   | 1     | NA        |
|                                                                                                                                              | 1    | NA                         | NA                         | UHOR_05259                  | 2                                         | UHOR_05259                  | um03397   | 1     | um03397   |
|                                                                                                                                              | 1    | NA                         | NA                         | NA                          | NA                                        | NA                          | NA        | NA    | NA        |
| <b>Sr_9B</b>                                                                                                                                 |      |                            |                            |                             |                                           |                             |           |       |           |
| sr14475                                                                                                                                      | 2    | mp01657                    | 2                          | mp01657                     | 2                                         | UHOR_05362                  | um03487   | 1     | um03487   |
| sr17427                                                                                                                                      | 4    | NA                         | NA                         | NA                          | NA                                        | NA                          | NA        | NA    | NA        |
| sr14476                                                                                                                                      | 1    | mp01620                    | 1                          | mp01620                     | 1                                         | UHOR_05364                  | um11083   | 1     | um11083   |
| <b>Sr_9C</b>                                                                                                                                 |      |                            |                            |                             |                                           |                             |           |       |           |
| sr11167.2                                                                                                                                    | NS 1 | mp00949                    | NS 1                       | mp00949                     | NS 1                                      | UHOR_05548                  | um03616   | NS 1  | um03616   |
| sr11165                                                                                                                                      | 3    | mp00910                    | 2                          | mp00910                     | 2                                         | UHOR_05546                  | um03615   | 2     | um03615   |
| sr11163.2                                                                                                                                    | 1    | mp00948                    | 2                          | mp00948                     | 2                                         | UHOR_05545                  | um03614   | 4     | um03614   |
| <b>Sr_9D</b>                                                                                                                                 |      |                            |                            |                             |                                           |                             |           |       |           |
| sr14559                                                                                                                                      | NS 5 | mp00675                    | NS NS                      | mp00675                     | NS NS                                     | NA                          | um11732   | NS NS | NA        |
| sr14558                                                                                                                                      | 3    | mp00669                    | 4                          | mp00669                     | 4                                         | NA                          | Um03564.2 | 1     | um03564.2 |
| sr14557                                                                                                                                      | 2    | mp00670                    | 2                          | mp00670                     | 2                                         | NA                          | um03563   | 3     | um03563   |
| <b>Sr_10A</b>                                                                                                                                |      |                            |                            |                             |                                           |                             |           |       |           |
| sr11226                                                                                                                                      | 2    | NA                         | NA                         | NA                          | NA                                        | NA                          | NA        | NA    | NA        |
| sr11227                                                                                                                                      | 1    | NA                         | NA                         | NA                          | NA                                        | NA                          | NA        | NA    | NA        |
| sr11231                                                                                                                                      | 1    | NA                         | NA                         | UHOR_14478                  | 1                                         | NA                          | um03750   | 1     | um03750   |
| sr20008                                                                                                                                      | 2    | mp00270                    | NS NS                      | mp00270                     | NS NS                                     | UHOR_14479                  | [um03745] | 1     | [um03745] |
| sr11232                                                                                                                                      | 1    | NA                         | NA                         | NA                          | NA                                        | UHOR_14479                  | um03746   | 1     | um03746   |
| sr11233                                                                                                                                      | 1    | NA                         | NA                         | NA                          | NA                                        | UHOR_14481                  | NA        | NA    | NA        |
| sr11234.2                                                                                                                                    | 1    | NA                         | NA                         | UHOR_07107                  | 1                                         | NA                          | um03749   | 2     | um03749   |
| sr11235.2                                                                                                                                    | 1    | NA                         | NA                         | NA                          | NA                                        | NA                          | NA        | NA    | NA        |
| sr11236.2                                                                                                                                    | 1    | NA                         | NA                         | NA                          | NA                                        | NA                          | um03751   | 1     | um03751   |
| sr11237<br>[sr11239.2,<br>sr11240]                                                                                                           | 1    | mp00267<br>[mp03415]       | mp00267<br>[mp03415]       | 5                           | UHOR_07319<br>[UHOR_08139,<br>UHOR_14482] | 1                           | um03752   | 2     | um03752   |

|                                   |       |   |           |       |                      |         |       |   |                                           |          |            |            |                      |               |         |
|-----------------------------------|-------|---|-----------|-------|----------------------|---------|-------|---|-------------------------------------------|----------|------------|------------|----------------------|---------------|---------|
| sr11238                           |       | 1 | NA        |       | mp00267<br>[mp03415] | 5       | NA    |   | UHOR_07319<br>[UHOR_08139,<br>UHOR_14482] | 1 [1]    | NA         |            | NA                   |               |         |
| sr11239.2                         |       |   |           |       |                      |         |       |   |                                           |          |            |            |                      |               |         |
| [sr11237,<br>sr11240]             | NS    | 1 |           |       | mp00267<br>[mp03415] | 5       | NA    |   | UHOR_07319<br>[UHOR_08139]                | 1 [1]    | NA         |            | um03752<br>[um03753] | 2 [1] NA      |         |
| sr11240                           |       |   |           |       |                      |         |       |   |                                           |          |            |            |                      |               |         |
| [sr11239.2,<br>sr11237]           | NS    | 1 |           |       | mp00267<br>[mp03415] | 5       | NA    |   | UHOR_07319<br>[UHOR_08139]                | 1 [1]    | NA         |            | um03752<br>[um03753] | 2 [1] um03753 |         |
| <b>Sr_11A</b>                     |       |   |           |       |                      |         |       |   |                                           |          |            |            |                      |               |         |
| sr14944                           |       | 2 | NA        |       | NA                   |         | NA    |   | NA                                        |          |            |            | um04035<br>[um04034] | 1 um04034     |         |
| sr14945                           |       | 1 | NA        |       | NA                   |         | NA    |   | NA                                        |          |            |            | NA                   | um04033       |         |
| sr14946                           |       | 1 | mp05943   | NS NS | mp05943              |         | NS NS |   | UHOR_13428                                | 1        | UHOR_13428 |            | 1                    | um04039       |         |
| sr14947                           |       | 1 | NA        |       | NA                   |         |       |   | NA                                        |          |            |            | NA                   | um04040       |         |
| sr14948                           |       | 1 | mp05944   |       | mp05944              |         | 2     |   | UHOR_06104                                | 2        | UHOR_06104 |            | 2                    | um11062       |         |
| <b>Sr_14A</b>                     |       |   |           |       |                      |         |       |   |                                           |          |            |            |                      |               |         |
| sr15239                           |       |   | mp04205   |       |                      |         |       |   | UHOR_06804                                |          |            |            | um01902.2            |               |         |
| [sr10629]                         | NS    | 2 | [mp04983] |       | mp04983              |         | NS 1  |   | [UHOR_02822]                              | NS 2 [1] | UHOR_06804 |            | NS 2 [1]             | um04353       |         |
| sr15240                           |       | 3 | mp04926   |       | mp04926              |         | 2     |   | UHOR_06805                                | 1        | UHOR_06805 |            | 1                    | um04354       |         |
| sr15241                           |       | 2 | mp04927   |       | mp04927              |         | 3     |   | UHOR_06806                                | 4        | UHOR_06806 |            | 4                    | um04355       |         |
| <b>Sr_16A</b>                     |       |   |           |       |                      |         |       |   |                                           |          |            |            |                      |               |         |
| sr16117                           |       | 3 | mp00633   | NS NS | mp00633              |         | NS NS |   | UHOR_07525                                | NS NS    | UHOR_07525 |            | NS NS                | um05786.2     |         |
| sr16118                           | NS    | 5 | mp00634   | NS NS | mp00634              |         | NS NS |   | UHOR_07527                                | NS 5     | UHOR_07527 |            | NS 5                 | um05787       |         |
| sr16119                           | NS    | 3 | NA        |       | NA                   |         |       |   | UHOR_07528                                | NS 2     | UHOR_07528 |            | NS 2                 | um11586       |         |
| <b>Sr_19A</b>                     |       |   |           |       |                      |         |       |   |                                           |          |            |            |                      |               |         |
| sr10050                           |       | 3 | NA        |       | NA                   |         |       |   | UHOR_10021                                | 3        | UHOR_10021 |            | 3                    | um05295       |         |
| sr10051                           | NS NS |   | NA        |       | NA                   |         |       |   | NA                                        |          | NA         |            |                      | um10553       |         |
| sr10052.2                         |       | 1 | NA        |       | NA                   |         |       |   | NA                                        |          | NA         |            |                      | um10554       |         |
| sr10053                           | NS    | 4 | NA        |       | NA                   |         |       |   | NA                                        |          | NA         |            | NS                   | um05299       |         |
| sr10054                           |       | 2 | mp02621   |       | mp02621              |         | 1     |   | NA                                        |          | NA         |            |                      | um05300       |         |
| sr10055                           |       | 2 | NA        |       | NA                   |         |       |   | NA                                        |          | NA         |            |                      | um05301       |         |
| <b>Sr_19B</b>                     |       |   |           |       |                      |         |       |   |                                           |          |            |            |                      |               |         |
| sr20015                           |       | 4 | NA        |       | NA                   |         |       |   | NA                                        |          | NA         |            |                      | NA            |         |
| sr10068                           | NS NS |   | NA        |       | NA                   |         |       |   | NA                                        |          | NA         |            |                      | um05310       |         |
| sr20013                           |       | 2 | NA        |       | NA                   |         |       |   | NA                                        |          | NA         |            |                      | [um05309]     |         |
| sr20014                           |       | 1 | NA        |       | NA                   |         |       |   | UHOR_08134                                | 4        | UHOR_08134 |            | 4                    | um05312       |         |
| sr10069                           |       | 1 | NA        |       | NA                   |         |       |   | NA                                        |          | NA         |            |                      | um05314       |         |
| <b>Sr_19C</b>                     |       |   |           |       |                      |         |       |   |                                           |          |            |            |                      |               |         |
| sr10073                           |       | 1 | NA        |       | NA                   |         |       |   | NA                                        |          | NA         |            |                      | um05319       |         |
| sr10075                           |       | 2 | NA        |       | NA                   |         |       |   | NA                                        |          | NA         |            |                      | um05318       |         |
| sr10077                           |       | 1 | NA        |       | NA                   |         |       |   | NA                                        |          | NA         |            |                      | NA            |         |
| sr10079                           |       | 1 | NA        |       | NA                   |         |       |   | NA                                        |          | NA         |            |                      | NA            |         |
| <b>Sr_20A</b>                     |       |   |           |       |                      |         |       |   |                                           |          |            |            |                      |               |         |
| sr13490                           |       | 1 | mp03254   |       | mp03254              |         | 4     |   | UHOR_03765                                | 1        | NA         |            |                      | um02293       |         |
| sr13491                           |       | 1 | NA        |       | NA                   |         |       |   | NA                                        |          | NA         |            |                      | um02294       |         |
| sr13492                           |       | 2 | NA        |       | NA                   |         |       |   | NA                                        |          | NA         |            |                      | um02295       |         |
| sr13493                           |       | 1 | NA        |       | NA                   |         |       |   | NA                                        |          | NA         |            |                      | um02296       |         |
| sr13494                           |       | 1 | NA        |       | NA                   |         |       |   | NA                                        |          | NA         |            |                      | um02297       |         |
| sr13495                           |       | 1 | NA        |       | NA                   |         |       |   | UHOR_03786                                | 1        | UHOR_03786 |            | 1                    | um02298       |         |
| sr13496                           |       | 1 | NA        |       | NA                   |         |       |   | NA                                        |          | NA         |            |                      | um02299       |         |
| <b>Sr_20B</b>                     |       |   |           |       |                      |         |       |   |                                           |          |            |            |                      |               |         |
| sr13520                           | NS    | 1 | NA        |       | NA                   |         |       |   | UHOR_03805                                | NS NS    | UHOR_03805 |            | NS NS                | Um02325.2     |         |
| sr13521                           | NS NS |   | mp04997   | NS NS | mp04997              |         | NS NS |   | UHOR_03807                                | NS NS    | UHOR_03807 |            | NS NS                | um02326       |         |
| sr13522                           |       |   |           |       |                      |         |       |   |                                           |          |            |            |                      |               |         |
| [sr13523,<br>sr13524]             |       | 1 | NA        |       | NA                   |         |       |   | NA                                        |          | NA         |            |                      | NA            |         |
| sr13523                           |       |   |           |       |                      |         |       |   |                                           |          |            |            |                      |               |         |
| [sr13522,<br>sr13524]             |       | 1 | NA        |       | NA                   |         |       |   | NA                                        |          | NA         |            |                      | NA            |         |
| sr13524                           |       |   |           |       |                      |         |       |   |                                           |          |            |            |                      |               |         |
| [sr13522,<br>sr13523]             |       | 1 | NA        |       | NA                   |         |       |   | NA                                        |          | NA         |            |                      | NA            |         |
| sr13525                           |       |   |           |       |                      |         |       |   |                                           |          |            |            |                      |               |         |
| [sr11400,<br>sr11401,<br>sr11402] |       | 1 | NA        |       | NA                   |         |       |   | NA                                        |          | NA         |            |                      | NA            |         |
| <b>Sr_20C</b>                     |       |   |           |       |                      |         |       |   |                                           |          |            |            |                      |               |         |
| sr16901                           | NS    | 2 | mp02947   | NS    | 1                    | NA      | NS    | 1 | UHOR_03901                                | NS       | 1          | UHOR_03901 | NS                   | 1             | um02383 |
| sr16900                           | NS    | 3 | NA        |       | NA                   |         |       |   | NA                                        |          | NA         |            |                      | NA            |         |
| sr13587                           |       | 2 | mp02948   |       | mp02948              |         | 2     |   | UHOR_03898                                | 2        | UHOR_03898 |            | 2                    | um02381       |         |
| <b>Sr_22A</b>                     |       |   |           |       |                      |         |       |   |                                           |          |            |            |                      |               |         |
| sr11351                           |       | 2 | NA        |       | mp06260              |         | NS NS |   | NA                                        |          | UHOR_08818 |            | 1                    | NA            |         |
| sr11352                           |       | 1 | NA        |       | NA                   |         |       |   | NA                                        |          | NA         |            |                      | NA            |         |
| sr11354.2                         |       | 1 | NA        |       | NA                   |         |       |   | NA                                        |          | NA         |            |                      | NA            |         |
| sr11355                           |       | 2 | NA        |       | NA                   |         |       |   | NA                                        |          | NA         |            |                      | NA            |         |
| <b>Sr_2I</b>                      |       |   |           |       |                      |         |       |   |                                           |          |            |            |                      |               |         |
| sr12165                           |       | 2 | mp00859   |       | mp00859              |         | 2     |   | UHOR_01319                                | 2        | UHOR_01319 |            | 2                    | um00876       |         |
| sr17063                           | NS    | 3 | mp06340   | NS NS | NA                   |         |       |   | UHOR_17004                                | NS 3     | UHOR_17004 |            | NS 3                 | um10568.2     |         |
| sr12167                           | NS    | 5 | mp00860   | NS    | 4                    | mp00860 | NS    | 4 | UHOR_01323                                | NS 5     | UHOR_01323 |            | NS 5                 | um00878       |         |
| <b>Sr_3I</b>                      |       |   |           |       |                      |         |       |   |                                           |          |            |            |                      |               |         |
| sr12809                           |       | 3 | mp04084   |       | mp04084              |         | 2     |   | UHOR_02584                                | 3        | UHOR_02584 |            | 3                    | um01734       |         |
| sr12812                           | NS    | 5 | mp04086   | NS    | 4                    | mp04086 | NS    | 4 | UHOR_02588                                | NS 4     | UHOR_02588 |            | NS 4                 | um01737.2     |         |
| sr12814                           | NS    | 1 | mp04166   | NS    | 1                    | mp04166 | NS    | 1 | UHOR_02590                                | 1        | UHOR_02590 |            | 1                    | um01739       |         |
| <b>Sr_3II</b>                     |       |   |           |       |                      |         |       |   |                                           |          |            |            |                      |               |         |
| sr10618                           | NS    | 3 | mp04199   | NS    | 3                    | mp04199 | NS    | 3 | UHOR_02811                                | NS 2     | UHOR_02811 |            | NS 2                 | um01894       |         |
| sr10619                           |       | 1 | NA        |       | NA                   |         |       |   | UHOR_02812                                | 1        | UHOR_02812 |            | 1                    | um10268       |         |
| sr10621                           |       | 2 | mp04200   | NS NS | mp04200              |         | NS NS |   | UHOR_02816                                | 2        | UHOR_02816 |            | 2                    | um01897       |         |
| <b>Sr_3III</b>                    |       |   |           |       |                      |         |       |   |                                           |          |            |            |                      |               |         |

|           |    |   |         |       |   |         |       |   |            |       |    |            |       |    |           |       |   |           |       |   |
|-----------|----|---|---------|-------|---|---------|-------|---|------------|-------|----|------------|-------|----|-----------|-------|---|-----------|-------|---|
| sr12936   |    | 4 | mp03321 |       | 3 | mp03321 |       | 3 | UHOR_02931 |       | 2  | UHOR_02931 |       | 2  | um01976   |       | 4 | um01976   |       | 4 |
| sr12937   |    | 1 | mp03322 |       | 1 | mp03322 |       | 1 | UHOR_02933 |       | 1  | UHOR_02933 |       | 1  | um01977   |       | 1 | um01977   |       | 1 |
| sr12940   | NS | 5 | mp03319 | NS NS |   | mp03319 | NS NS |   | UHOR_02936 | NS    | 1  | UHOR_02936 | NS    | 1  | um01980   | NS NS |   | um01980   | NS NS |   |
| Sr_5I     |    |   |         |       |   |         |       |   |            |       |    |            |       |    |           |       |   |           |       |   |
| sr10778   |    | 4 | mp05151 | NS NS |   | mp05151 | NS NS |   | UHOR_03623 | NS NS |    | UHOR_03623 | NS NS |    | um02793   | NS NS |   | um02793   | NS NS |   |
| sr10780   | NS | 2 | mp05150 | NS    | 2 | mp05150 | NS    | 2 | UHOR_03625 | NS    | 2  | UHOR_03625 | NS    | 2  | um02203   | NS    | 2 | um02203   | NS    | 2 |
| sr10781   |    | 5 | mp05149 |       | 2 | mp05149 |       | 2 | UHOR_03626 |       | 1  | UHOR_03626 |       | 1  | um02204   |       | 1 | um02204   |       | 1 |
| Sr_7I     |    |   |         |       |   |         |       |   |            |       |    |            |       |    |           |       |   |           |       |   |
| sr14086   | NS | 5 | mp02287 | NS NS |   | mp02287 | NS NS |   | UHOR_04751 | NS    | 3  | UHOR_04751 | NS    | 3  | um10362   | NS    | 4 | um10362   | NS    | 4 |
| sr14088   | NS | 4 | mp03794 | NS    | 4 | mp03794 | NS    | 4 | UHOR_04754 | NS NS |    | UHOR_04754 | NS NS |    | um03028   | NS    | 5 | um03028   | NS    | 5 |
| sr14091   |    | 2 | mp03793 |       | 2 | mp03793 |       | 2 | UHOR_04758 |       | 2  | UHOR_04758 |       | 2  | um12205   |       | 2 | um12205   |       | 2 |
| Sr_8I     |    |   |         |       |   |         |       |   |            |       |    |            |       |    |           |       |   |           |       |   |
| sr14199   | NS | 1 | mp02465 | NS    | 1 | mp02465 | NS    | 1 | UHOR_04925 | NS    | 1  | UHOR_04925 | NS    | 1  | um03156   | NS    | 1 | um03156   | NS    | 1 |
| sr14197   |    | 2 | NA      |       |   | NA      |       |   | NA         |       |    | NA         |       |    | NA        |       |   | NA        |       |   |
| sr14196   |    | 1 | NA      |       |   | NA      |       |   | NA         |       |    | NA         |       |    | um03154   |       |   | um03154   |       | 4 |
| Sr_8II    |    |   |         |       |   |         |       |   |            |       |    |            |       |    |           |       |   |           |       |   |
| sr11072   |    | 1 | mp02475 | NS    | 4 | mp02475 | NS    | 4 | UHOR_04902 |       | 1  | UHOR_04902 |       | 1  | um03140.2 | NS    | 1 | um03140.2 | NS    | 1 |
| sr11075   |    | 1 | NA      |       |   | NA      |       |   | NA         |       |    | NA         |       |    | um03138   |       |   | um03138   |       | 1 |
| sr11076   | NS | 1 | mp02476 | NS    | 1 | mp02476 | NS    | 1 | UHOR_04959 | NS    | 1  | UHOR_04959 | NS    | 1  | um10380   | NS    | 1 | um10380   | NS    | 1 |
| Sr_8III   |    |   |         |       |   |         |       |   |            |       |    |            |       |    |           |       |   |           |       |   |
| sr14367   | NS | 4 | mp02452 | NS NS |   | mp02452 | NS NS |   | UHOR_05230 | NS    | 4  | UHOR_05230 | NS    | 4  | um11014   | NS    | 4 | um11014   | NS    | 4 |
| sr14368   |    | 1 | NA      |       |   | NA      |       |   | UHOR_05232 |       | 2  | UHOR_05232 |       | 2  | um12226   |       | 2 | um12226   |       | 2 |
| sr14370   | NS | 4 | NA      |       |   | NA      |       |   | NA         |       |    | UHOR_05234 | NS NS |    | NA        |       |   | um11015   |       | 3 |
| Sr_12I    |    |   |         |       |   |         |       |   |            |       |    |            |       |    |           |       |   |           |       |   |
| sr15149   |    | 1 | NA      |       |   | NA      |       |   | NA         |       |    | NA         |       |    | NA        |       |   | NA        |       |   |
| sr15147   |    | 2 | NA      |       |   | NA      |       |   | NA         |       |    | NA         |       |    | NA        |       |   | um10418   |       | 1 |
| sr15146   |    | 1 | NA      |       |   | NA      |       |   | NA         |       |    | NA         |       |    | um12258   |       | 1 | um12258   |       | 1 |
| Sr_13I    |    |   |         |       |   |         |       |   |            |       |    |            |       |    |           |       |   |           |       |   |
| sr15383   | NS | 1 | mp03071 | NS    | 1 | mp03071 | NS    | 1 | UHOR_06472 | NS    | 2  | UHOR_06472 | NS    | 2  | um04500   | NS    | 1 | um04500   | NS    | 1 |
| sr15385   | NS | 1 | NA      |       |   | NA      |       |   | UHOR_06473 | NS    | 1  | UHOR_06473 | NS    | 1  | um11984   | NS    | 1 | um11984   | NS    | 1 |
| sr15386   |    | 1 | mp03027 | NS    | 4 | mp03027 | NS    | 4 | NA         |       |    | NA         |       |    | um04503   |       | 5 | um04503   |       | 5 |
| Sr_13II   |    |   |         |       |   |         |       |   |            |       |    |            |       |    |           |       |   |           |       |   |
| sr15521   | NS | 1 | NA      |       |   | NA      |       |   | UHOR_06669 | NS    | 1  | UHOR_06669 | NS    | 1  | um04637   | NS    | 1 | um04637   | NS    | 1 |
| sr15523   |    | 1 | mp05745 | NS NS |   | mp05745 | NS NS |   | NA         |       |    | NA         |       |    | um11540   |       | 2 | um11540   |       | 2 |
| sr15524   |    | 1 | mp03463 |       | 1 | mp03463 |       | 1 | UHOR_06672 | NS    | 1  | UHOR_06672 | NS    | 1  | um11541   |       | 1 | um11541   |       | 1 |
| Sr_17I    |    |   |         |       |   |         |       |   |            |       |    |            |       |    |           |       |   |           |       |   |
| sr15595   |    | 3 | mp02718 | NS    | 5 | mp02718 | NS    | 5 | UHOR_07563 |       | NS | UHOR_07563 |       | NS | um10675   | NS    | 4 | um10675   | NS    | 4 |
| sr15597   |    | 2 | mp00396 |       | 2 | mp00396 |       | 2 | UHOR_07566 |       | 2  | UHOR_07566 |       | 2  | um10676   |       | 3 | um10676   |       | 3 |
| sr15598   | NS | 5 | mp00395 | NS    | 5 | mp00395 | NS    | 5 | UHOR_07567 | NS NS |    | UHOR_07567 | NS NS |    | um04720   | NS NS |   | um04720   | NS NS |   |
| Sr_19I    |    |   |         |       |   |         |       |   |            |       |    |            |       |    |           |       |   |           |       |   |
| sr10057   |    | 2 | NA      |       |   | NA      |       |   | NA         |       |    | NA         |       |    | um05302   |       | 1 | um05302   |       | 1 |
| sr10058   |    | 2 | NA      |       |   | NA      |       |   | NA         |       |    | NA         |       |    | um05305   |       | 1 | um05305   |       | 1 |
| sr10059   |    | 1 | NA      |       |   | NA      |       |   | UHOR_08128 |       | 1  | UHOR_08128 |       | 1  | um05306   |       | 1 | um05306   |       | 1 |
| Sr_21I    |    |   |         |       |   |         |       |   |            |       |    |            |       |    |           |       |   |           |       |   |
| sr16735   |    | 1 | mp03409 |       | 1 | NA      |       | 1 | UHOR_08673 |       | 1  | UHOR_08673 |       | 1  | um06112   |       | 1 | NA        |       |   |
| sr16737   |    | 1 | NA      |       |   | NA      |       |   | NA         |       |    | NA         |       |    | NA        |       |   | NA        |       |   |
| sr16738   | NS | 4 | NA      |       |   | NA      |       |   | NA         |       |    | NA         |       |    | NA        |       |   | NA        |       |   |
| Sr_21II   |    |   |         |       |   |         |       |   |            |       |    |            |       |    |           |       |   |           |       |   |
| sr16762   |    | 2 | mp03407 |       | 1 | mp03407 |       | 1 | UHOR_08684 |       | 1  | UHOR_08684 |       | 1  | um06118   |       | 2 | um06118   |       | 2 |
| sr16760   |    | 1 | NA      |       |   | mp03408 |       | 1 | UHOR_08680 |       | 1  | UHOR_08680 |       | 1  | um06116   |       | 1 | um06116   |       | 1 |
| sr16759   |    | 1 | mp03430 | NS NS |   | mp03430 | NS NS |   | UHOR_08679 | NS NS |    | UHOR_08679 | NS NS |    | um11211   |       | 1 | um11211   |       | 1 |
| Sr_22I    |    |   |         |       |   |         |       |   |            |       |    |            |       |    |           |       |   |           |       |   |
| sr11351   |    | 2 | NA      |       |   | NA      |       |   | NA         |       |    | UHOR_08818 |       | 1  | NA        |       |   | NA        |       |   |
| sr11352   |    | 1 | NA      |       |   | NA      |       |   | NA         |       |    | NA         |       |    | NA        |       |   | NA        |       |   |
| sr11354.2 |    | 1 | NA      |       |   | NA      |       |   | NA         |       |    | NA         |       |    | NA        |       |   | NA        |       |   |
| sr11355   |    | 2 | NA      |       |   | NA      |       |   | NA         |       |    | NA         |       |    | NA        |       |   | NA        |       |   |
| Sr_23I    |    |   |         |       |   |         |       |   |            |       |    |            |       |    |           |       |   |           |       |   |
| sr16868   | NS | 3 | mp02516 | NS NS |   | mp02516 | NS NS |   | UHOR_08979 | NS    | 3  | UHOR_08979 | NS    | 3  | um06426   | NS    | 3 | um06426   | NS    | 3 |
| sr16869   | NS | 4 | NA      |       |   | NA      |       |   | UHOR_08981 | NS NS |    | UHOR_08981 | NS NS |    | NA        |       |   | NA        |       |   |
| sr16871   |    | 1 | NA      |       |   | NA      |       |   | NA         |       |    | NA         |       |    | um06428   |       | 2 | um06428   |       | 2 |

NS specifies the non-secreted protein coding genes  
NA specifies the absence of an orthologous gene  
Grey shade highlights the PSEPs genes  
SP and TP columns represent the SignalP v4 and TargetP v1.1 predicted PSEPs, respectively  
OrthoMCL and Inparanoid columns represent the orthologous genes predicted by OrthoMCL and Inparanoid tools respectively  
Gene Ids in brackets are the gene Ids of paralogous genes  
Pathogenicity cluster identifiers has been named according to this nomenclature: SpeciesName\_ChromosomeClusterNumber\_1  
Clusters having letter as cluster number have been predicted by both of the "Three direct Neighbour" and "3kb Window based" methods  
Clusters having Roman numerals as cluster number have been predicted by the "3kb Window based" method  
"\_" has been added to cluster identifier to distinguish the Ids from previously reported clusters



[UHOR\_14878,  
 UHOR\_13417,  
 UHOR\_14701,  
 UHOR\_17013,  
 UHOR\_16037,  
 UHOR\_16472,  
 UHOR\_15782,  
 UHOR\_16712,  
 UHOR\_15189,  
 UHOR\_14944,  
 UHOR\_15313,  
 UHOR\_13470,  
 UHOR\_13968,  
 UHOR\_13437,  
 UHOR\_17014,  
 UHOR\_14943,  
 UHOR\_14792,  
 UHOR\_15878,  
 UHOR\_14903,  
 UHOR\_13469,  
 UHOR\_08525,  
 UHOR\_12464,  
 UHOR\_15311,  
 UHOR\_13585,  
 UHOR\_12239,  
 UHOR\_00398,  
 UHOR\_10036,  
 [UHOR\_13014,  
 UHOR\_13171,  
 UHOR\_15097,  
 UHOR\_15241,  
 UHOR\_14582,  
 UHOR\_16473,  
 UHOR\_15081,  
 UHOR\_13015,  
 UHOR\_17012,  
 UHOR\_13172,  
 UHOR\_14558,  
 UHOR\_13022,  
 UHOR\_15715,  
 UHOR\_14945,  
 UHOR\_14891,  
 UHOR\_14904,  
 UHOR\_13166,  
 UHOR\_08922,  
 UHOR\_12248,  
 UHOR\_12478,  
 UHOR\_15967,  
 UHOR\_15121,  
 UHOR\_13543,  
 UHOR\_13884,  
 UHOR\_14890,  
 UHOR\_10035,  
 UHOR\_15096,

|    |    |    |    |    |    |                     |    |    |
|----|----|----|----|----|----|---------------------|----|----|
| NS | 2  | NA | NA | NA | NA | NA                  | NA | NA |
| 3  | NA | NA | NA | NA | NA | um01392,<br>um10959 | NA |    |

Uh\_5.00034A

|            |    |   |         |    |   |         |    |   |           |    |   |           |    |   |         |    |   |         |    |   |
|------------|----|---|---------|----|---|---------|----|---|-----------|----|---|-----------|----|---|---------|----|---|---------|----|---|
| UHOR_05548 | NS | 1 | mp00949 | NS | 1 | mp00949 | NS | 1 | sr11167.2 | NS | 1 | sr11167.2 | NS | 1 | um03616 | NS | 1 | um03616 | NS | 1 |
| UHOR_05546 |    | 2 | mp00910 |    | 2 | mp00910 |    | 2 | sr11165   |    | 3 | sr11165   |    | 3 | um03615 |    | 2 | um03615 |    | 2 |
| UHOR_05545 |    | 1 | mp00948 |    | 2 | mp00948 |    | 2 | sr11163.2 |    | 1 | sr11163.2 |    | 1 | um03614 |    | 4 | um03614 |    | 4 |

Uh\_5.00036A

|                                           |  |   |         |    |    |    |  |  |                                        |    |    |         |  |   |         |  |    |         |  |   |
|-------------------------------------------|--|---|---------|----|----|----|--|--|----------------------------------------|----|----|---------|--|---|---------|--|----|---------|--|---|
| UHOR_15110<br>[UHOR_03787,<br>UHOR_16796] |  | 1 | mp05670 | NS | NS | NA |  |  | sr10056 [sr13899,<br>sr00526, sr00527] | NS | NS | NA      |  |   | NA      |  | NA |         |  |   |
| UHOR_03787<br>[UHOR_15110,<br>UHOR_16796] |  | 1 | mp05670 | NS | NS | NA |  |  | sr10056 [sr13899,<br>sr00526, sr00527] | NS | NS | NA      |  |   | NA      |  | NA |         |  |   |
| UHOR_03786                                |  | 1 | NA      |    |    | NA |  |  | sr13495                                |    | 1  | sr13495 |  | 1 | um02298 |  | 2  | um02298 |  | 2 |

Uh\_5.00037A

|                                           |    |    |         |    |   |         |    |   |         |    |    |         |    |    |         |    |    |         |    |    |
|-------------------------------------------|----|----|---------|----|---|---------|----|---|---------|----|----|---------|----|----|---------|----|----|---------|----|----|
| UHOR_04925                                | NS | 1  | mp02465 | NS | 1 | mp02465 | NS | 1 | sr14199 | NS | 1  | sr14199 | NS | 1  | um03156 | NS | 1  | um03156 | NS | 1  |
| UHOR_04924                                | NS | NS | NA      |    |   | NA      |    |   | sr14198 | NS | NS | sr14198 | NS | NS | um10382 | NS | NS | um10382 | NS | NS |
| UHOR_04923<br>[UHOR_04922,<br>UHOR_04676] |    | 3  | NA      |    |   | NA      |    |   | sr14222 |    | 1  | sr14222 |    | 1  | um12216 |    | 1  | um12216 |    | 1  |
| UHOR_04922<br>[UHOR_04923,<br>UHOR_04676] |    | 1  | NA      |    |   | NA      |    |   | sr14222 |    | 1  | sr14222 |    | 1  | um12216 |    | 1  | um12216 |    | 1  |
| UHOR_04921                                |    | 1  | NA      |    |   | NA      |    |   | NA      |    |    | NA      |    |    | NA      |    |    | NA      |    |    |

Uh\_5.00037B

|            |    |   |         |    |   |         |    |   |         |    |   |         |    |   |           |    |   |           |    |   |
|------------|----|---|---------|----|---|---------|----|---|---------|----|---|---------|----|---|-----------|----|---|-----------|----|---|
| UHOR_04902 |    | 1 | mp02475 | NS | 4 | mp02475 | NS | 4 | sr11072 |    | 1 | sr11072 |    | 1 | um03140.2 | NS | 1 | um03140.2 | NS | 1 |
| UHOR_04900 |    | 1 | NA      |    |   | NA      |    |   | NA      |    |   | NA      |    |   | NA        |    |   | NA        |    |   |
| UHOR_04959 | NS | 1 | mp02476 | NS | 1 | mp02476 | NS | 1 | sr11076 | NS | 1 | sr11076 | NS | 1 | um10380   |    | 1 | um10380   |    | 1 |

Uh\_5.00040A

|                                           |    |   |                      |    |     |                      |    |     |         |  |   |         |  |   |         |  |   |         |  |   |
|-------------------------------------------|----|---|----------------------|----|-----|----------------------|----|-----|---------|--|---|---------|--|---|---------|--|---|---------|--|---|
| UHOR_03683                                | NS | 3 | mp02910<br>[mp03261] | NS | [4] | mp02910<br>[mp03261] | NS | [4] | sr16550 |  | 1 | sr16550 |  | 1 | um05927 |  | 1 | um05926 |  | 1 |
| UHOR_15327<br>[UHOR_03684,<br>UHOR_15327] |    | 1 | NA                   |    |     | NA                   |    |     | sr16551 |  | 2 | sr16551 |  | 2 | um05928 |  | 1 | NA      |  |   |
| UHOR_03684<br>[UHOR_15327]                |    | 1 | NA                   |    |     | NA                   |    |     | sr16551 |  | 2 | NA      |  |   | um05928 |  | 1 | um05928 |  | 1 |

Uh\_5.00041A

|                                                          |  |   |         |  |   |         |  |   |         |  |   |         |    |    |         |  |   |                                    |  |          |
|----------------------------------------------------------|--|---|---------|--|---|---------|--|---|---------|--|---|---------|----|----|---------|--|---|------------------------------------|--|----------|
| UHOR_03533                                               |  | 3 | mp05657 |  | 3 | mp05657 |  | 3 | sr13360 |  | 5 | sr13360 |    | 5  | um02134 |  | 2 | um02134                            |  | 2        |
| UHOR_03534                                               |  | 1 | NA      |  |   | NA      |  |   | NA      |  |   | NA      |    |    | NA      |  |   | NA                                 |  |          |
| UHOR_03536                                               |  | 1 | NA      |  |   | NA      |  |   | NA      |  |   | sr13363 |    | 1  | NA      |  |   | NA                                 |  |          |
| UHOR_15387<br>[UHOR_15858,<br>UHOR_15725,<br>UHOR_13170] |  | 1 | NA      |  |   | mp05658 |  | 2 | NA      |  |   | sr13377 | NS | NS | NA      |  |   | um02138<br>[um11377.2,<br>um01796] |  | 1 [1, 2] |

|               |      |         |  |               |  |                   |       |                |  |       |           |                |                                    |      |
|---------------|------|---------|--|---------------|--|-------------------|-------|----------------|--|-------|-----------|----------------|------------------------------------|------|
| UHOR_03560    |      |         |  |               |  |                   |       |                |  |       |           |                |                                    |      |
| [UHOR_15724]  | 4    | NA      |  | NA            |  | NA                |       | NA             |  | NA    |           | NA             |                                    |      |
| UHOR_03557    | 1    | NA      |  | NA            |  | NA                |       | NA             |  | NA    |           | NA             |                                    |      |
| Uh_5.00043A   |      |         |  |               |  |                   |       |                |  |       |           |                |                                    |      |
| UHOR_04494    | 1    | NA      |  | NA            |  | sr13902 [sr13898] | 1 [1] | sr13898        |  | 1 [1] | um02851   | 1 um02851      | 1                                  |      |
| UHOR_04496    | 1    | NA      |  | NA            |  | sr13903           | 2     | sr13904        |  | 1     | um02852   | 2 um02852      | 2                                  |      |
| UHOR_04499    | 3    | NA      |  | NA            |  | NA                |       | NA             |  |       | NA        |                |                                    |      |
| UHOR_04500    | 1    | NA      |  | NA            |  | NA                |       | NA             |  |       | NA        |                |                                    |      |
| Uh_5.00044A   |      |         |  |               |  |                   |       |                |  |       |           |                |                                    |      |
| UHOR_04736    |      |         |  |               |  |                   |       |                |  |       |           |                |                                    |      |
| [UHOR_06702,  |      |         |  |               |  |                   |       |                |  |       |           |                |                                    |      |
| UHOR_08826,   |      |         |  |               |  |                   |       |                |  |       |           |                |                                    |      |
| UHOR_08252,   |      |         |  |               |  |                   |       |                |  |       |           |                |                                    |      |
| UHOR_06051,   |      |         |  |               |  |                   |       |                |  |       |           |                |                                    |      |
| UHOR_06234 ]  | 2    | NA      |  | NA            |  | sr02613           |       | 1 sr02613      |  | 1     | NA        |                | NA                                 |      |
| UHOR_04746    | 1    | NA      |  | NA            |  | NA                |       | NA             |  |       | NA        |                | NA                                 |      |
| UHOR_04747    | 2    | mp02285 |  | 1 mp02285     |  | sr14076           |       | 4 sr14076      |  | 4     | um03024   | 1 um03024      | 1                                  |      |
| UHOR_04748    | 1    | mp02286 |  | 1 mp02286     |  | sr14075           |       | 2 sr14075      |  | 2     | um03023   | 1 um03023      | 1                                  |      |
| Uh_5.00047A   |      |         |  |               |  |                   |       |                |  |       |           |                |                                    |      |
| UHOR_15722    | NS 2 | NA      |  | NA            |  | NA                |       | NA             |  |       | NA        |                | NA                                 |      |
| UHOR_15724    |      |         |  |               |  |                   |       |                |  |       |           |                |                                    |      |
| [UHOR_03560]  | 5    | NA      |  | NA            |  | NA                |       | NA             |  |       | NA        |                | NA                                 |      |
| UHOR_15725    |      |         |  |               |  |                   |       |                |  |       |           |                |                                    |      |
| [UHOR_15387,  |      |         |  |               |  |                   |       |                |  |       |           |                |                                    |      |
| UHOR_15858,   |      |         |  |               |  |                   |       |                |  |       |           |                |                                    |      |
| UHOR_13170]   | 1    | NA      |  | mp05658       |  | NA                |       | NA             |  |       | NA        |                | um02138<br>[um11377.2,<br>um01796] |      |
|               |      |         |  |               |  |                   |       |                |  |       |           |                | 1 [1, 2]                           |      |
| Uh_5.00054A   |      |         |  |               |  |                   |       |                |  |       |           |                |                                    |      |
| UHOR_00167    | 3    | mp02114 |  | 1 mp02114     |  | sr11444           |       | 1 sr11444      |  | 1     | um00104   | 1 NA           |                                    |      |
| UHOR_00168    | 1    | mp02113 |  | 1 mp02113     |  | sr11445           |       | 1 sr11445      |  | 1     | um00105   | 1 um00105      | 1                                  |      |
| UHOR_00169    | NS 5 | mp01976 |  | NS 4 mp01976  |  | sr11446           |       | NS 5 sr11446   |  | NS 5  | um10023   | NS 5 um10023   | NS 5                               |      |
| UHOR_00170    | 2    | mp02112 |  | 2 mp02112     |  | sr11447           |       | 1 sr11447      |  | 1     | um10024   | 2 um10024      | 2                                  |      |
| Uh_5.00006I   |      |         |  |               |  |                   |       |                |  |       |           |                |                                    |      |
| UHOR_08818    | 1    | NA      |  | NA            |  | NA                |       | sr11351        |  | 2     | um06221   | 4 um06221      | 4                                  |      |
| UHOR_08819    | 1    | NA      |  | NA            |  | NA                |       | NA             |  |       | NA        |                | NA                                 |      |
| UHOR_13384    | 1    | NA      |  | NA            |  | NA                |       | NA             |  |       | NA        |                | NA                                 |      |
| Uh_5.00009I   |      |         |  |               |  |                   |       |                |  |       |           |                |                                    |      |
| UHOR_08680    | 1    | NA      |  | mp03408       |  | sr16760           |       | 1 sr16760      |  | 1     | um06116   | 1 um06116      | 1                                  |      |
| UHOR_08684    | 1    | mp03407 |  | 1 mp03407     |  | sr16762           |       | 2 sr16762      |  | 2     | um06118   | 2 um06118      | 2                                  |      |
| UHOR_08685    | 1    | mp03406 |  | 2 mp03406     |  | sr16757           |       | 1 sr16757      |  | 1     | um06120   | 3 um06120      | 3                                  |      |
| Uh_5.00024I   |      |         |  |               |  |                   |       |                |  |       |           |                |                                    |      |
| UHOR_14478    | 1    | NA      |  | NA            |  | sr11231           |       | 1 NA           |  |       | um03750   | 1 [1] NA       |                                    |      |
| UHOR_14479    | 3    | mp00270 |  | NS NS mp00270 |  | sr20008           |       | 2 sr20008      |  | 2     | [um03745] | 1 um03746      | 1                                  |      |
| UHOR_14481    | 1    | NA      |  | NA            |  | NA                |       | sr11233        |  | 1     | um03747   | 1 um03747      | 1                                  |      |
| Uh_5.00049I   |      |         |  |               |  |                   |       |                |  |       |           |                |                                    |      |
| UHOR_02931    | 2    | mp03321 |  | 3 mp03321     |  | sr12936           |       | 4 sr12936      |  | 4     | um01976   | 4 um01976      | 4                                  |      |
| UHOR_02933    | 1    | mp03322 |  | 1 mp03322     |  | sr12937           |       | 1 sr12937      |  | 1     | um01977   | 1 um01977      | 1                                  |      |
| UHOR_02936    | NS 1 | mp03319 |  | NS NS mp03319 |  | sr12940           |       | NS 5 sr12940   |  | NS 5  | um01980   | NS NS um01980  | NS NS                              |      |
| Uh_5.00050I   |      |         |  |               |  |                   |       |                |  |       |           |                |                                    |      |
| UHOR_02636    | 1    | mp04147 |  | 1 mp04147     |  | sr12850           |       | 2 sr12850      |  | 2     | um01772   | 1 um01772      | 1                                  |      |
| UHOR_02638    | 1    | mp04107 |  | 2 mp04107     |  | sr12852           |       | 1 sr12852      |  | 1     | um01774   | 2 um01774      | 2                                  |      |
| UHOR_02640    | NS 5 | mp04108 |  | NS 4 mp04108  |  | sr12853           |       | NS 5 sr12853   |  | NS 5  | um01775   | NS 5 um01775   | NS 5                               |      |
| Uh_5.00050II  |      |         |  |               |  |                   |       |                |  |       |           |                |                                    |      |
| UHOR_02754    | NS 3 | mp02316 |  | NS 2 mp02316  |  | sr10561           |       | NS 3 sr10561   |  | NS 3  | um01860   | NS 4 um01860   | NS 4                               |      |
| UHOR_02756    | 1    | mp02317 |  | 4 mp02317     |  | NA                |       | NA             |  |       | um01858   | 1 um01858      | 1                                  |      |
| UHOR_02759    | NS 4 | mp02313 |  | NS 3 mp02313  |  | sr10556           |       | NS 2 sr10556   |  | NS 2  | um01856   | NS 4 um01856   | NS 4                               |      |
| Uh_5.00050III |      |         |  |               |  |                   |       |                |  |       |           |                |                                    |      |
| UHOR_02811    | NS 2 | NA      |  | mp04199       |  | NA                |       | sr10618        |  | NS 3  | NA        |                | um01894                            | NS 3 |
| UHOR_02812    | 1    | NA      |  | NA            |  | sr10619           |       | 1 sr10619      |  | 1     | um0268    | 1 um0268       | 1                                  |      |
| UHOR_02816    | 2    | mp04200 |  | NS NS mp04200 |  | sr10621           |       | NS 2 sr10621   |  | NS 2  | um01897   | NS 3 um01897   | NS 3                               |      |
| Uh_5.00060I   |      |         |  |               |  |                   |       |                |  |       |           |                |                                    |      |
| UHOR_02001    | 2    | NA      |  | NA            |  | NA                |       | NA             |  |       | NA        |                | um01334                            | NS 2 |
| UHOR_02005    | NS 1 | NA      |  | NA            |  | sr10477           |       | 1 sr10477      |  | 1     | um12133   | 1 um12133      | 1                                  |      |
| UHOR_02007    | NS 4 | NA      |  | NA            |  | NA                |       | NA             |  |       | NA        |                | NA                                 |      |
| Uh_5.00061I   |      |         |  |               |  |                   |       |                |  |       |           |                |                                    |      |
| UHOR_01944    | 1    | NA      |  | NA            |  | Sr10429.2         |       | NS 1 sr10429.2 |  | NS 1  | um01297   | 1 um01297      | 1                                  |      |
| UHOR_01947    | 1    | NA      |  | NA            |  | NA                |       | NA             |  |       | NA        |                | NA                                 |      |
| UHOR_01952    | 1    | NA      |  | NA            |  | NA                |       | NA             |  |       | um01300   | 2 um01300      | 2                                  |      |
| Uh_5.00066I   |      |         |  |               |  |                   |       |                |  |       |           |                |                                    |      |
| UHOR_01319    | 2    | mp00859 |  | 2 mp00859     |  | sr12165           |       | 2 sr12165      |  | 2     | um00876   | 2 um00876      | 2                                  |      |
| UHOR_17004    | NS 3 | mp06340 |  | NS NS NA      |  | sr17063           |       | NS 3 sr17063   |  | NS 3  | um10568.2 | NS 3 um10568.2 | NS 3                               |      |
| UHOR_01323    | NS 5 | mp00860 |  | NS 4 mp00860  |  | sr12167           |       | NS 5 sr12167   |  | NS 5  | um00878   | NS 5 um00878   | NS 5                               |      |

NS specifies the non-secreted protein coding genes

NA specifies the absence of an orthologous gene

Grey shade highlights the PSEPs genes

SP and TP columns represent the SignalP v4 and TargetP v1.1 predicted PSEPs, respectively

OrthoMCL and Inparanoid columns represent the orthologous genes predicted by OrthoMCL and Inparanoid tools respectively

Gene ids in brackets are the gene ids of paralogous genes

Pathogenicity cluster identifiers has been named according to this nomenclature: SpeciesName\_ChromosomeClusterNumber\_1

Clusters having letter as cluster number have been predicted by both of the "Three direct Neighbour" and "3kb Window based" methods

Clusters having Roman numerals as cluster number have been predicted by the "3kb Window based" method

"\_1" has been added to cluster identifier to distinguish the ids from previously reported clusters

**Supplementary table 6. *Melanopsichium pennsylvanicum* pathogenicity clusters and their orthologous genes in other genomes.**

| Mp4                |    |    | <i>S.reilianum</i> |    |                                     |            |         |    | <i>U.hordei</i> |    |            |            |    |      | <i>U.maydis</i> |    |      |            |    |      |  |
|--------------------|----|----|--------------------|----|-------------------------------------|------------|---------|----|-----------------|----|------------|------------|----|------|-----------------|----|------|------------|----|------|--|
| Gene_Id            | SP | TP | OrthoMCL           | SP | TP                                  | Inparanoid | SP      | TP | OrthoMCL        | SP | TP         | Inparanoid | SP | TP   | OrthoMCL        | SP | TP   | Inparanoid | SP | TP   |  |
| <b>Mp4_Sca1A</b>   |    |    |                    |    |                                     |            |         |    |                 |    |            |            |    |      |                 |    |      |            |    |      |  |
| mp01975            |    | 1  | sr11441            |    | 1                                   | sr11441    |         | 1  | UHOR_00164      |    | 1          | UHOR_00164 |    | 1    | um00102         |    | 1    | um00102    |    | 1    |  |
| mp06008            |    | 1  | NA                 |    | NA                                  |            |         |    | NA              |    | NA         |            |    |      | NA              |    | NA   |            |    |      |  |
| mp02114            |    | 1  | sr11444            |    | 1                                   | sr11444    |         | 1  | UHOR_00167      |    | 3          | UHOR_00167 |    | 3    | um00104         |    | 1    | um00104    |    | 1    |  |
| mp02113            |    | 1  | sr11445            |    | 1                                   | sr11445    |         | 1  | UHOR_00168      |    | 1          | UHOR_00168 |    | 1    | um00105         |    | 1    | um00105    |    | 1    |  |
| mp01976            | NS | 4  | sr11446            | NS | 5                                   | sr11446    | NS      | 5  | UHOR_00169      | NS | 5          | UHOR_00169 | NS | 5    | um10023         | NS | 5    | um10023    | NS | 5    |  |
| mp02112            |    | 2  | sr11447            |    | 1                                   | sr11447    |         | 1  | UHOR_00170      |    | 2          | UHOR_00170 |    | 2    | um10024         |    | 2    | um10024    |    | 2    |  |
| <b>Mp4_Sca116A</b> |    |    |                    |    |                                     |            |         |    |                 |    |            |            |    |      |                 |    |      |            |    |      |  |
| mp00397            | NS | 4  | sr15599            | NS | NA                                  |            |         |    | UHOR_07569      | NS | NS         | NA         |    |      | um04721         | NS | NS   | NA         |    |      |  |
| mp00395            | NS | 5  | sr15598            | NS | 5                                   | sr15598    | NS      | 5  | UHOR_07567      | NS | NS         | UHOR_07567 | NS | NS   | um04720         | NS | NS   | um04720    | NS | NS   |  |
| mp00396            |    | 2  | sr15597            |    | 2                                   | sr15597    |         | 2  | UHOR_07566      |    | 2          | UHOR_07566 |    | 2    | um10676         |    | 3    | um10676    |    | 3    |  |
| <b>Mp4_Sca13A</b>  |    |    |                    |    |                                     |            |         |    |                 |    |            |            |    |      |                 |    |      |            |    |      |  |
| mp00949            | NS | 1  | sr11167.2          | NS | 1                                   | sr11167.2  | NS      | 1  | UHOR_05548      | NS | 1          | UHOR_05548 | NS | 1    | um03616         | NS | 1    | um03616    | NS | 1    |  |
| mp00910            |    | 2  | sr11165            |    | 3                                   | sr11165    |         | 3  | UHOR_05546      |    | 2          | UHOR_05546 |    | 2    | um03615         |    | 2    | um03615    |    | 2    |  |
| mp00948            |    | 2  | sr11163.2          |    | 1                                   | sr11163.2  |         | 1  | UHOR_05545      |    | 1          | UHOR_05545 |    | 1    | um03614         |    | 4    | um03614    |    | 4    |  |
| <b>Mp4_Sca157A</b> |    |    |                    |    |                                     |            |         |    |                 |    |            |            |    |      |                 |    |      |            |    |      |  |
| mp01253            | NS | 1  | NA                 |    | NA                                  |            |         |    | NA              |    | NA         |            |    |      | NA              |    | NA   |            |    |      |  |
| mp01254            | NS | 3  | sr14382            | NS | 3                                   | sr14382    | NS      | 3  | NA              |    | NA         |            |    |      | um03383         | NS | 3    | um03383    | NS | 3    |  |
| mp01259            |    | 4  | sr14381            |    | 2                                   | sr14381    |         | 2  | UHOR_05245      |    | 2          | UHOR_05245 |    | 2    | um03382         |    | 2    | um03382    |    | 2    |  |
| mp01258            |    | 1  | sr14380            |    | 1                                   | sr14380    |         | 1  | UHOR_05247      |    | 2          | UHOR_05247 |    | 2    | um03381         |    | 1    | um03381    |    | 1    |  |
| mp01255            | NS | 4  | sr14378            | NS | 3                                   | sr14378    | NS      | 3  | UHOR_05242      | NS | 4          | UHOR_05242 | NS | 4    | um03379         | NS | 1    | um03379    | NS | 1    |  |
| <b>Mp4_Sca160A</b> |    |    |                    |    |                                     |            |         |    |                 |    |            |            |    |      |                 |    |      |            |    |      |  |
| mp01355            | NS | 2  | sr13163            | NS | 2                                   | sr13163    | NS      | 2  | UHOR_03256      | NS | 4          | UHOR_03256 | NS | 4    | um06274         | NS | 2    | um06274    | NS | 2    |  |
| mp01354            | NS | 1  | sr13162            | NS | 1                                   | sr13162    | NS      | 1  | UHOR_03255      | NS | 1          | UHOR_03255 | NS | 1    | um06273         | NS | 1    | um06273    | NS | 1    |  |
| mp01353            | NS | 4  | sr13176            | NS | 3                                   | sr13176    | NS      | 3  | UHOR_03254      | NS | 3          | UHOR_03254 | NS | 3    | um06287         | NS | NS   | um06287    | NS | NS   |  |
| <b>Mp4_Sca175A</b> |    |    |                    |    |                                     |            |         |    |                 |    |            |            |    |      |                 |    |      |            |    |      |  |
| mp01569            | NS | 1  | sr16122            | NS | 2                                   | NA         |         |    | NA              |    | NA         |            |    |      | um05791         | NS | 3    | NA         |    |      |  |
| mp01567            | NS | 3  | sr12494            | NS | NS                                  | sr12494    | NS      | NS | UHOR_02144      | NS | 4          | UHOR_02144 | NS | 4    | um01428         | NS | 3    | um01428    | NS | 3    |  |
| mp01568            |    | 2  | NA                 |    | NA                                  |            |         |    | UHOR_02143      |    | 1          | UHOR_02143 |    | 1    | um01427         |    | 2    | um01427    |    | 2    |  |
| mp01576            | NS | 2  | sr14845            | NS | NS                                  | NA         |         |    | UHOR_05967      | NS | NS         | NA         |    |      | um03941         | NS | NS   | NA         |    |      |  |
| <b>Mp4_Sca25A</b>  |    |    |                    |    |                                     |            |         |    |                 |    |            |            |    |      |                 |    |      |            |    |      |  |
| mp02632            |    | 1  | NA                 |    | NA                                  |            |         |    | NA              |    | NA         |            |    |      | NA              |    | NA   |            |    |      |  |
| mp02631            |    | 1  | NA                 |    | NA                                  |            |         |    | NA              |    | NA         |            |    |      | NA              |    | NA   |            |    |      |  |
| mp02621            |    | 1  | sr10054            |    | 2                                   | sr10054    |         | 2  | NA              |    | NA         |            |    |      | um05300         |    | 1    | um05300    |    | 1    |  |
| mp02622            |    | 2  | sr10066            | NS | NS                                  | sr10066    | NS      | NS | NA              |    | NA         |            |    |      | NA              |    | NA   |            |    |      |  |
| mp02623            |    | 1  | sr10066            | NS | NS                                  | NA         |         |    | NA              |    | NA         |            |    |      | NA              |    | NA   |            |    |      |  |
| mp02630            |    | 1  | NA                 |    | NA                                  |            |         |    | NA              |    | NA         |            |    |      | NA              |    | NA   |            |    |      |  |
| <b>Mp4_Sca28A</b>  |    |    |                    |    |                                     |            |         |    |                 |    |            |            |    |      |                 |    |      |            |    |      |  |
| mp02842            |    | 1  | NA                 |    | NA                                  |            |         |    | NA              |    | NA         |            |    |      | NA              |    | NA   |            |    |      |  |
| mp02836            |    | 2  | NA                 |    | NA                                  |            |         |    | NA              |    | NA         |            |    |      | NA              |    | NA   |            |    |      |  |
| mp06261            |    | 1  | NA                 |    | NA                                  |            |         |    | NA              |    | NA         |            |    |      | NA              |    | NA   |            |    |      |  |
| <b>Mp4_Sca29A</b>  |    |    |                    |    |                                     |            |         |    |                 |    |            |            |    |      |                 |    |      |            |    |      |  |
| mp02924            | NS | 3  | NA                 |    | NA                                  |            |         |    | UHOR_03655      | NS | NS         | UHOR_03655 | NS | NS   | um02223         | NS | NS   | um02223    | NS | NS   |  |
| mp02923            | NS | 5  | sr13406            | NS | NS                                  | sr13406    | NS      | NS | UHOR_03656      | NS | NS         | UHOR_03656 | NS | NS   | um02224         | NS | NS   | um02224    | NS | NS   |  |
| mp02922            | NS | 4  | sr13407            | NS | 5                                   | sr13407    | NS      | 5  | UHOR_03657      | NS | 5          | UHOR_03657 | NS | 5    | um02225         | NS | NS   | um02225    | NS | NS   |  |
| <b>Mp4_Sca29B</b>  |    |    |                    |    |                                     |            |         |    |                 |    |            |            |    |      |                 |    |      |            |    |      |  |
| mp02913            |    | 4  | sr13431            |    | 2                                   | sr13431    |         | 2  | UHOR_03675      | NS | NS         | NA         |    |      | um12316         |    | 1    | um12316    |    | 1    |  |
| mp02912            | NS | 1  | sr13433            | NS | NS                                  | sr13433    | NS      | NS | UHOR_03677      | NS | NS         | UHOR_03677 | NS | NS   | um02238.2       | NS | NS   | um02238.2  | NS | NS   |  |
| mp06299            |    | 2  | sr13434            |    | 4                                   | sr13434    |         | 4  | NA              |    | UHOR_03678 |            | 2  |      | um02239         |    | 2    | um02239    |    | 2    |  |
| <b>Mp4_Sca29C</b>  |    |    |                    |    |                                     |            |         |    |                 |    |            |            |    |      |                 |    |      |            |    |      |  |
| mp06108            |    | 1  | NA                 |    | sr16559 [sr16561, sr16560, sr16558] |            | 1, 1, 2 |    | NA              |    | UHOR_06592 |            | 2  |      | NA              |    | NA   |            |    |      |  |
| mp02885            |    | 1  | NA                 |    | NA                                  |            |         |    | NA              |    | UHOR_15322 |            | 1  |      | NA              |    | NA   |            |    |      |  |
| mp06300            | NS | 1  | NA                 |    | NA                                  |            |         |    | NA              |    | UHOR_15322 |            | 1  |      | NA              |    | NA   |            |    |      |  |
| <b>Mp4_Sca31A</b>  |    |    |                    |    |                                     |            |         |    |                 |    |            |            |    |      |                 |    |      |            |    |      |  |
| mp03132            |    | 1  | sr15068            |    | 2                                   | sr15068    |         | 2  | NA              |    | UHOR_06275 |            | 2  |      | um04185         |    | 1    | um04185    |    | 1    |  |
| mp03086            |    | 1  | NA                 |    | sr10429.2, sr10430.2                |            | 1       |    | NA              |    | NA         |            |    |      | um01298.2       |    |      | um01298.2  |    | 1, 1 |  |
| mp03981            |    | 1  | sr15071            | NS | NS                                  | NA         |         |    | UHOR_06277      | NS | NS         | NA         |    |      | um04187         | NS | NS   | NA         |    |      |  |
| mp03087            |    | 1  |                    |    |                                     |            |         |    |                 |    |            |            |    |      |                 |    |      |            |    |      |  |
| <b>Mp4_Sca37A</b>  |    |    |                    |    |                                     |            |         |    |                 |    |            |            |    |      |                 |    |      |            |    |      |  |
| mp03406            |    | 2  | sr16757            |    | 1                                   | sr16757    |         | 1  | UHOR_08685      |    | 1          | UHOR_08685 |    | 1    | um06120         |    | 3    | um06120    |    | 3    |  |
| mp03432            |    | 1  | sr16758            |    | 1                                   | sr16758    |         | 1  | NA              |    | NA         |            |    |      | um06119         |    | 1    | um06119    |    | 1    |  |
| mp03407            |    | 1  | sr16762            |    | 2                                   | sr16762    |         | 2  | UHOR_08684      |    | 1          | UHOR_08684 |    | 1    | um06118         |    | 2    | um06118    |    | 2    |  |
| mp03408            |    | 1  | NA                 |    | sr16760                             |            | 1       |    | NA              |    | UHOR_08680 |            | 1  |      | um06116         |    |      | um06116    |    | 1    |  |
| <b>Mp4_Sca4A</b>   |    |    |                    |    |                                     |            |         |    |                 |    |            |            |    |      |                 |    |      |            |    |      |  |
| mp04115            |    | 3  | sr12866            |    | 2                                   | sr12866    |         | 2  | UHOR_02660      | NS | 2          | UHOR_02660 | NS | 2    | um01788         |    | 1    | um01788    |    | 1    |  |
| mp04138            |    | 2  | sr12867            | NS | 2                                   | NA         |         |    | UHOR_02662      | NS | 4          | NA         |    |      | um01789         | NS | 2    | NA         |    |      |  |
| mp04116            | NS | 5  | sr12868            | NS | NS                                  | sr12868    | NS      | NS | UHOR_02663      | NS | NS         | UHOR_02663 | NS | NS   | um01790         | NS | NS   | um01790    | NS | NS   |  |
| <b>Mp4_Sca6A</b>   |    |    |                    |    |                                     |            |         |    |                 |    |            |            |    |      |                 |    |      |            |    |      |  |
| mp04983            | NS | 1  | sr10629            |    | 1, 2                                | sr15239    |         | 2  | UHOR_02822      |    | 1, 2       | UHOR_06804 |    | 1, 2 | um04353         | NS | 1, 1 | um04353    | NS | 1    |  |
| mp04926            |    | 2  | sr15240            |    | 3                                   | sr15240    |         | 3  | UHOR_06805      |    | 1          | UHOR_06805 |    | 1    | um04354         |    | 1    | um04354    |    | 1    |  |
| mp04927            |    | 3  | sr15241            |    | 2                                   | sr15241    |         | 2  | UHOR_06806      |    | 4          | UHOR_06806 |    | 4    | um04355         |    | 2    | um04355    |    | 2    |  |
| <b>Mp4_Sca74A</b>  |    |    |                    |    |                                     |            |         |    |                 |    |            |            |    |      |                 |    |      |            |    |      |  |
| mp05161            |    | 1  | NA                 |    | NA                                  |            |         |    | NA              |    | NA         |            |    |      | NA              |    | NA   |            |    |      |  |
| mp05160            |    | 1  | NA                 |    | NA                                  |            |         |    | NA              |    | NA         |            |    |      | NA              |    | NA   |            |    |      |  |
| mp05143            | NS | 5  | sr10769            | NS | 5                                   | sr10769    | NS      | 5  | UHOR_03615      | NS | NS         | UHOR_03615 | NS | NS   | um10070         | NS | 2    | um10070    | NS | 2    |  |



| Mp4_Sca91A  |    |   |                                    |    |       |         |    |    |                            |            |            |            |                      |            |            |           |         |         |           |    |         |    |    |
|-------------|----|---|------------------------------------|----|-------|---------|----|----|----------------------------|------------|------------|------------|----------------------|------------|------------|-----------|---------|---------|-----------|----|---------|----|----|
| mp05747     |    | 2 | NA                                 |    | NA    |         | NA |    | NA                         |            | NA         |            |                      |            |            |           |         |         |           |    |         |    |    |
| mp05726     |    | 3 | NA                                 |    | NA    |         | NA |    | NA                         |            | NA         |            |                      |            |            |           |         |         |           |    |         |    |    |
| mp05727     |    | 2 | NA                                 |    | NA    |         | NA |    | NA                         |            | NA         |            |                      |            |            |           |         |         |           |    |         |    |    |
| Mp4_Sca10I  |    |   |                                    |    |       |         |    |    |                            |            |            |            |                      |            |            |           |         |         |           |    |         |    |    |
| mp00268     |    | 1 | NA                                 |    | NA    |         | NA |    | NA                         |            | NA         |            |                      |            |            |           |         |         |           |    |         |    |    |
| mp00267     |    | 5 | Sr11239.2<br>[sr11240,<br>sr11237] | NS | 1, 1] | sr11238 |    | 1  | UHOR_07319<br>[UHOR_08139] |            | 1[1]       | NA         | um03752<br>[um03753] |            | 2          | [1]       | NA      |         | NS        | NS |         |    |    |
| mp00223     |    | 2 | sr11242                            | NS | NS    | sr11242 |    | NS | NS                         | UHOR_05719 | NS         | NS         | UHOR_05719           | NS         | NS         | um03755   | NS      | NS      | um03755   | NS | NS      |    |    |
| Mp4_Sca219I |    |   |                                    |    |       |         |    |    |                            |            |            |            |                      |            |            |           |         |         |           |    |         |    |    |
| mp02313     | NS | 3 | sr10556                            | NS | 2     | sr10556 |    | NS | 2                          | UHOR_02759 | NS         | 4          | UHOR_02759           | NS         | 4          | um01856   | NS      | 4       | um01856   | NS | 4       |    |    |
| mp02317     |    | 4 | NA                                 |    | NA    |         | NA |    | NA                         |            | 1          | UHOR_02756 |                      | 1          | UHOR_02756 |           | 1       | um01858 |           | 1  | um01858 |    | 1  |
| mp02316     | NS | 2 | sr10561                            | NS | 3     | sr10561 |    | NS | 3                          | UHOR_02754 | NS         | 3          | UHOR_02754           | NS         | 3          | um01860   | NS      | 4       | um01860   | NS | 4       |    |    |
| Mp4_Sca23I  |    |   |                                    |    |       |         |    |    |                            |            |            |            |                      |            |            |           |         |         |           |    |         |    |    |
| mp02475     | NS | 4 | sr11072                            |    | 1     | sr11072 |    |    | 1                          | UHOR_04902 |            | 1          | UHOR_04902           |            | 1          | Um03140.2 | NS      | 1       | um03140.2 | NS | 1       |    |    |
| mp02498     |    | 4 | NA                                 |    | NA    |         | NA |    | NA                         |            | NA         |            | NA                   |            | NA         | NA        |         | NA      |           | NA |         | NA |    |
| mp02476     | NS | 1 | sr11076                            | NS | 1     | sr11076 |    | NS | 1                          | UHOR_04959 | NS         | 1          | UHOR_04959           | NS         | 1          | um10380   | NS      | 1       | um10380   | NS | 1       |    |    |
| Mp4_Sca4I   |    |   |                                    |    |       |         |    |    |                            |            |            |            |                      |            |            |           |         |         |           |    |         |    |    |
| mp04147     |    | 1 | sr12850                            |    | 2     | sr12850 |    |    | 2                          | UHOR_02636 |            | 1          | UHOR_02636           |            | 1          | um01772   |         | 1       | um01772   |    | 1       |    |    |
| mp04107     |    | 2 | sr12852                            |    | 1     | sr12852 |    |    | 1                          | UHOR_02638 |            | 1          | UHOR_02638           |            | 1          | um01774   |         | 2       | um01774   |    | 2       |    |    |
| mp04108     | NS | 4 | sr12853                            | NS | 5     | sr12853 |    | NS | 5                          | UHOR_02640 | NS         | 5          | UHOR_02640           | NS         | 5          | um01775   | NS      | 5       | um01775   | NS | 5       |    |    |
| Mp4_Sca4II  |    |   |                                    |    |       |         |    |    |                            |            |            |            |                      |            |            |           |         |         |           |    |         |    |    |
| mp04110     |    | 1 | NA                                 |    | NA    |         | NA |    | NA                         |            | UHOR_02651 | NS         | NS                   | UHOR_02647 |            | 2         | NA      |         | NA        |    | NA      |    |    |
| mp04143     | NS | 5 | sr12860                            | NS | NS    | NA      |    |    | NA                         |            | UHOR_02652 | NS         | 4                    | UHOR_02652 | NS         | 4         | um01782 | NS      | NS        | NA |         | NA |    |
| mp04141     | NS | 5 | sr12861                            | NS | NS    | sr12861 |    | NS | NS                         | NA         |            | UHOR_02652 | NS                   | 4          | UHOR_02652 | NS        | 4       | um01783 | NS        | NS | um01783 | NS | NS |
| Mp4_Sca53I  |    |   |                                    |    |       |         |    |    |                            |            |            |            |                      |            |            |           |         |         |           |    |         |    |    |
| mp06224     | NS | 4 | NA                                 |    | NA    |         | NA |    | NA                         |            | UHOR_07793 |            | 3                    | NA         |            | NA        |         | NA      |           | NA |         | NA |    |
| mp04323     | NS | 4 | sr15760                            | NS | NS    | NA      |    |    | NA                         |            | NA         |            | NA                   |            | NA         |           | NA      |         | NA        |    | NA      |    |    |
| mp04322     |    | 1 | sr15758                            |    | 1     | sr15758 |    |    | 1                          | UHOR_07788 |            | 1          | UHOR_07788           |            | 1          | um12007   | NS      | 2       | um12007   | NS | 2       |    |    |
| Mp4_Sca9I   |    |   |                                    |    |       |         |    |    |                            |            |            |            |                      |            |            |           |         |         |           |    |         |    |    |
| mp05985     |    | 1 | sr14937                            |    | 1     | sr14937 |    |    | 1                          | UHOR_06098 |            | 1          | UHOR_06098           |            | 1          | um04032   | NS      | NS      | um04032   | NS | NS      |    |    |
| mp05984     | NS | 1 | sr14938                            | NS | 2     | sr14938 |    | NS | 2                          | UHOR_06097 | NS         | 2          | UHOR_06097           | NS         | 2          | um04031   | NS      | 1       | um04031   | NS | 1       |    |    |
| mp05983     |    | 1 | NA                                 |    | NA    |         | NA |    | NA                         |            | NA         |            | NA                   |            | NA         | NA        |         | NA      |           | NA |         | NA |    |

NS specifies the non-secreted protein coding genes  
NA specifies the absence of an orthologous gene  
Grey shade highlights the PSEPs genes  
SP and TP columns represent the SignalP v4 and TargetP v1.1 predicted PSEPs, respectively  
OrthoMCL and Inparanoid columns represent the orthologous genes predicted by OrthoMCL and Inparanoid tools respectively  
Gene ids in brackets are the gene ids of paralogous genes  
Pathogenicity cluster identifiers has been named according to this nomenclature: SpeciesName\_ChromosomeClusterNumber\_1  
Clusters having letter as cluster number have been predicted by both of the "Three direct Neighbour" and "3kb Window based" methods  
Clusters having Roman numerals as cluster number have been predicted by the "3kb Window based" method  
"\_1" has been added to cluster identifier to distinguish the ids from previously reported clusters

**Supplementary Table 7.** The 92 PSEP encoding genes that are not having any orthologous gene in *M. pennsylvanicum*, but are present in the other three smut genomes.

| Ortholog    | Orthologous genes |         |                                                                        |            |            |            |           |         |         |
|-------------|-------------------|---------|------------------------------------------------------------------------|------------|------------|------------|-----------|---------|---------|
| Ortholog 1  | um00793           | um00792 | conserved hypothetical Ustilago-specific protein                       | UHOR_01209 | UHOR_01211 |            | sr12086   | sr12084 | sr12085 |
| Ortholog 2  | um02298           |         | hypothetical protein                                                   | UHOR_03786 | UHOR_15110 |            | sr13495   |         |         |
| Ortholog 3  | um12216           |         | related to Mig1 protein                                                | UHOR_04922 | UHOR_04923 | UHOR_03787 | sr14222   |         |         |
| Ortholog 4  | um03202           | um10403 | conserved hypothetical Ustilago-specific protein                       | UHOR_04986 |            |            | sr11101   | sr11102 |         |
| Ortholog 5  | um02851           |         | putative protein                                                       | UHOR_04494 |            | UHOR_04676 | sr13897   | sr13898 | sr13902 |
| Ortholog 6  | um03397           |         | hypothetical protein                                                   | UHOR_05259 |            |            | sr14386   | sr14385 |         |
| Ortholog 7  | um00822           | um03112 | conserved hypothetical protein                                         | UHOR_04870 |            |            | sr14175   |         |         |
| Ortholog 8  | um03745           | um03750 | conserved hypothetical Ustilago-specific protein                       | UHOR_14478 |            |            | sr11231   |         |         |
| Ortholog 9  | um03923           |         | conserved hypothetical protein                                         | UHOR_05946 |            |            | sr14828   |         |         |
| Ortholog 10 | um11763           |         | related to acetylxlanyl esterase                                       | UHOR_06739 |            |            | sr15573   |         |         |
| Ortholog 11 | um06050           |         | conserved hypothetical protein                                         | UHOR_08590 |            |            | sr16674   |         |         |
| Ortholog 12 | um05097           |         | related to secreted aspartic protease 2                                | UHOR_03029 |            |            | sr12999   |         |         |
| Ortholog 13 | um05229           |         | related to Beta-mannosidase precursor                                  | UHOR_03214 |            |            | sr13138   |         |         |
| Ortholog 14 | um05306           |         | conserved hypothetical Ustilago-specific protein                       | UHOR_08128 |            |            | sr10059   |         |         |
| Ortholog 15 | um05312           |         | conserved hypothetical Ustilago-specific protein                       | UHOR_08134 |            |            | sr20014   |         |         |
| Ortholog 16 | um03749           |         | conserved hypothetical Ustilago-specific protein                       | UHOR_07107 |            |            | sr11234.2 |         |         |
| Ortholog 17 | um04309           |         | probable Alpha-L-arabinofuranosidase precursor                         | UHOR_06745 |            |            | sr15193   |         |         |
| Ortholog 18 | um10844           |         | conserved hypothetical protein                                         | UHOR_06776 |            |            | sr15215   |         |         |
| Ortholog 19 | um00795           |         | hypothetical protein                                                   | UHOR_01210 |            |            | sr12087   |         |         |
| Ortholog 20 | um03201           |         | hypothetical protein                                                   | UHOR_04984 |            |            | sr11100   |         |         |
| Ortholog 21 | um12215           |         | hypothetical protein                                                   | UHOR_15214 |            |            | sr14221   |         |         |
| Ortholog 22 | um02212           |         | related to trehalase precursor                                         | UHOR_03641 |            |            | sr10799   |         |         |
| Ortholog 23 | um02229           |         | conserved hypothetical Ustilago-specific protein                       | UHOR_03665 |            |            | sr13418   |         |         |
| Ortholog 24 | um05928           |         | conserved hypothetical Ustilago-specific protein                       | UHOR_15327 |            |            | sr16551   |         |         |
| Ortholog 25 | um05930           |         | conserved hypothetical Ustilago-specific protein                       | UHOR_03426 |            |            | sr16553   |         |         |
| Ortholog 26 | um02071           |         | conserved hypothetical protein                                         | UHOR_03441 |            |            | sr13292   |         |         |
| Ortholog 27 | um02852           |         | conserved hypothetical Ustilago-specific protein                       | UHOR_04496 |            |            | sr13903   |         |         |
| Ortholog 28 | um12197           |         | putative protein                                                       | UHOR_04531 |            |            | sr13927   |         |         |
| Ortholog 29 | um03223           |         | Mig1 protein, induced during biotrophic phase                          | UHOR_04675 |            |            | sr14220   |         |         |
| Ortholog 30 | um03065           |         | putative protein                                                       | UHOR_04803 |            |            | sr14124   |         |         |
| Ortholog 31 | um03105           |         | hypothetical protein                                                   | UHOR_04865 |            |            | sr14168   |         |         |
| Ortholog 32 | um02510           |         | probable PGU1 - Endo-polygalacturonase                                 | UHOR_04037 |            |            | sr10957   |         |         |
| Ortholog 33 | um11931           |         | conserved hypothetical protein                                         | UHOR_04400 |            |            | sr13816   |         |         |
| Ortholog 34 | um10268           |         | putative protein                                                       | UHOR_02812 |            |            | sr10619   |         |         |
| Ortholog 35 | um01690           |         | hypothetical protein                                                   | UHOR_02510 |            |            | sr12761   |         |         |
| Ortholog 36 | um11362           |         | putative protein                                                       | UHOR_02538 |            |            | sr12780   |         |         |
| Ortholog 37 | um01553           |         | conserved hypothetical protein                                         | UHOR_02305 |            |            | sr12625   |         |         |
| Ortholog 38 | um00480           |         | transmembrane mucin involved in surface sensing via MAP-kinase cascade | UHOR_00748 |            |            | sr10165.2 |         |         |
| Ortholog 39 | um00534           |         | conserved hypothetical protein                                         | UHOR_03931 |            |            | sr11810   |         |         |

|             |         |         |                                                  |            |  |           |
|-------------|---------|---------|--------------------------------------------------|------------|--|-----------|
| Ortholog 40 | um01422 |         | probable Lipase B precursor                      | UHOR_02134 |  | sr12489   |
| Ortholog 41 | um01297 |         | conserved hypothetical Ustilago-specific protein | UHOR_01944 |  | sr10429.2 |
| Ortholog 42 | um12127 |         | hypothetical protein                             | UHOR_01705 |  | sr12428   |
| Ortholog 43 | um02535 |         | conserved hypothetical Ustilago-specific protein | UHOR_12257 |  | sr10996.2 |
| Ortholog 44 | um02466 |         | hypothetical protein                             | UHOR_04028 |  | sr10906   |
| Ortholog 45 | um05295 |         | conserved hypothetical Ustilago-specific protein | UHOR_10021 |  | sr10050   |
| Ortholog 46 | um11002 |         | conserved hypothetical Ustilago-specific protein | UHOR_08915 |  | sr16823   |
| Ortholog 47 | um00609 | um03076 | conserved hypothetical protein                   | UHOR_00948 |  | sr14135   |
| Ortholog 48 | um06376 |         | probable GTP-binding protein SAR1                | UHOR_08907 |  | sr16818   |
| Ortholog 49 | um06431 |         | conserved hypothetical protein                   | UHOR_08983 |  | sr16874   |
| Ortholog 50 | um06440 |         | conserved hypothetical protein                   | UHOR_08989 |  | sr16877   |
| Ortholog 51 | um04514 |         | hypothetical protein                             | UHOR_06494 |  | sr15399   |
| Ortholog 52 | um06157 |         | related to Spherulin 4 precursor                 | UHOR_08725 |  | sr11263   |
| Ortholog 53 | um12330 |         | hypothetical protein                             | UHOR_08860 |  | sr16778   |
| Ortholog 54 | um04057 |         | related to dihydroflavonol reductase             | UHOR_06132 |  | sr14966   |
| Ortholog 55 | um04039 |         | hypothetical protein                             | UHOR_13428 |  | sr14946   |
| Ortholog 56 | um06116 |         | putative protein                                 | UHOR_08680 |  | sr16760   |
| Ortholog 57 | um12321 |         | conserved hypothetical protein                   | UHOR_08538 |  | sr16625   |
| Ortholog 58 | um04816 |         | related to Endoglucanase 1 precursor             | UHOR_07693 |  | sr15690   |
| Ortholog 59 | um05680 |         | putative protein                                 | UHOR_07344 |  | sr16013   |
| Ortholog 60 | um10742 |         | conserved hypothetical protein                   | UHOR_07373 |  | sr16032   |
| Ortholog 61 | um05290 |         | putative protein                                 | UHOR_08119 |  | sr10043   |
| Ortholog 62 | um05046 |         | conserved hypothetical protein                   | UHOR_07232 |  | sr15930   |
| Ortholog 63 | um05495 |         | conserved hypothetical protein                   | UHOR_07881 |  | sr16175   |
| Ortholog 64 | um05548 |         | related to L-ascorbate oxidase precursor         | UHOR_07954 |  | sr16230   |
| Ortholog 65 | um05562 |         | related to stress response protein rds1p         | UHOR_07974 |  | sr16247   |
| Ortholog 66 | um03747 |         | conserved hypothetical Ustilago-specific protein | UHOR_14481 |  | sr11233   |
| Ortholog 67 | um04407 |         | conserved hypothetical protein                   | UHOR_06885 |  | sr15295   |
| Ortholog 68 | um04422 |         | related to endo-1,4-beta-xylanase b              | UHOR_06909 |  | sr15309   |
| Ortholog 69 | um00781 |         | putative protein                                 | UHOR_01190 |  | sr12072   |
| Ortholog 70 | um03411 |         | probable endo-1,4-beta-xylanase                  | UHOR_05270 |  | sr14403   |
| Ortholog 71 | um05803 |         | related to acid phosphatase                      | UHOR_08281 |  | sr16428   |
| Ortholog 72 | um02254 |         | hypothetical protein                             | UHOR_03711 |  | sr13449   |
| Ortholog 73 | um12226 |         | putative protein                                 | UHOR_05232 |  | sr14368   |
| Ortholog 74 | um05964 |         | related to esterase                              | UHOR_08487 |  | sr16592   |
| Ortholog 75 | um11467 |         | conserved hypothetical protein                   | UHOR_03481 |  | sr13320   |
| Ortholog 76 | um02921 |         | conserved hypothetical protein                   | UHOR_04603 |  | sr13976   |
| Ortholog 77 | um02922 |         | probable sulfite reductase cys-4                 | UHOR_04604 |  | sr13977   |
| Ortholog 78 | um02597 |         | related to Rhizopuspepsin precursor              | UHOR_04152 |  | sr13637   |
| Ortholog 79 | um02652 |         | putative protein                                 | UHOR_04241 |  | sr13699   |
| Ortholog 80 | um11723 |         | related to ER glucosidase I                      | UHOR_04362 |  | sr13790   |
| Ortholog 81 | um02740 |         | probable Alpha-glucosidase precursor             | UHOR_04375 |  | sr13799   |

|             |           |                                                    |            |           |
|-------------|-----------|----------------------------------------------------|------------|-----------|
| Ortholog 82 | um12175   | conserved hypothetical protein                     | UHOR_02828 | sr10635.2 |
| Ortholog 83 | um10274   | putative protein                                   | UHOR_02844 | sr10650   |
| Ortholog 84 | um10816   | conserved hypothetical protein                     | UHOR_02311 | sr12627   |
| Ortholog 85 | um10000   | conserved hypothetical protein                     | UHOR_00039 | sr06444   |
| Ortholog 86 | um10052   | conserved hypothetical protein                     | UHOR_00313 | sr11546   |
| Ortholog 87 | um00446   | probable beta-glucosidase                          | UHOR_00702 | sr10116   |
| Ortholog 88 | um00492   | conserved hypothetical protein                     | UHOR_00762 | sr10182   |
| Ortholog 89 | um01244   | conserved hypothetical protein                     | UHOR_01870 | sr10321   |
| Ortholog 90 | um00837.2 | related to Alpha-L-arabinofuranosidase I precursor | UHOR_01245 | sr12124   |
| Ortholog 91 | um01130   | conserved hypothetical protein                     | UHOR_01709 | sr12431   |
| Ortholog 92 | um03746   | conserved hypothetical Ustilago-specific protein   | UHOR_14479 | sr20008   |

**Supplementary Table 8.** The 248 orthologs of PSEP encoding genes that are present in all four smut genomes.

| Orthologs   | <i>U. maydis</i> ids | <i>U. maydis</i> ids | <i>U. maydis</i> gene annotation                                                 | <i>Mp4</i> gene id | <i>Mp4</i> gene id | <i>S. reilianum</i> ids | <i>U. hordei</i> ids | <i>U. hordei</i> ids |
|-------------|----------------------|----------------------|----------------------------------------------------------------------------------|--------------------|--------------------|-------------------------|----------------------|----------------------|
| Ortholog 1  | um03752              | um03753              | conserved hypothetical Ustilago-specific protein                                 | mp00267            | mp03415            | sr11237                 | UHOR_07319           | UHOR_08139           |
| Ortholog 2  | um05927              |                      | conserved hypothetical Ustilago-specific protein                                 | mp02910            | mp03261            | sr16550                 | UHOR_03684           |                      |
| Ortholog 3  | um02826              |                      | conserved hypothetical protein                                                   | mp04181            | mp04842            | sr13869                 | UHOR_04456           |                      |
| Ortholog 4  | um04364              | um05550              | probable EXG1 - Exo-1,3-beta-glucanase precursor                                 | mp04978            |                    | sr15250                 | UHOR_06823           |                      |
| Ortholog 5  | um04557              |                      | conserved hypothetical protein                                                   | mp01386            |                    | sr13615                 | UHOR_06553           | UHOR_08049           |
| Ortholog 6  | um10881              |                      | probable ribonuclease T1                                                         | mp05498            |                    | sr12878                 | UHOR_03174           | UHOR_02675           |
| Ortholog 7  | um01149              |                      | glyoxaloxidase 3                                                                 | mp01033            |                    | sr12449                 | UHOR_01735           |                      |
| Ortholog 8  | um02465              |                      | related to Calcium influx promoting protein ehs1                                 | mp01039            |                    | sr10904                 | UHOR_04026           |                      |
| Ortholog 9  | um02475              |                      | hypothetical protein                                                             | mp01043            |                    | sr10918.2               | UHOR_12209           |                      |
| Ortholog 10 | um04463              |                      | related to vesicular integral-membrane protein VIP36                             | mp01058            |                    | sr15350                 | UHOR_06967           |                      |
| Ortholog 11 | um10640              |                      | conserved hypothetical protein                                                   | mp01067            |                    | sr11116                 | UHOR_05003           |                      |
| Ortholog 12 | um00326              |                      | conserved hypothetical protein                                                   | mp00110            |                    | sr11677                 | UHOR_00505           |                      |
| Ortholog 13 | um11715              |                      | related to VPS13 - involved in regulating membrane traffic (N-terminal fragment) | mp01119            |                    | sr11032                 | UHOR_04092           |                      |
| Ortholog 14 | um10099              |                      | conserved hypothetical protein                                                   | mp00111            |                    | sr11678                 | UHOR_00506           |                      |
| Ortholog 15 | um02523              |                      | related to Endoglucanase 1 precursor                                             | mp01151            |                    | sr10982                 | UHOR_04056           |                      |
| Ortholog 16 | um11407              |                      | conserved hypothetical protein                                                   | mp01160            |                    | sr10958                 | UHOR_04038           |                      |
| Ortholog 17 | um01022              |                      | conserved hypothetical protein                                                   | mp01171            |                    | sr12315                 | UHOR_01593           |                      |
| Ortholog 18 | um11341              |                      | related to ALG12 - alpha-1,6-mannosyltransferase                                 | mp00118            |                    | sr11692                 | UHOR_00523           |                      |
| Ortholog 19 | um11908              |                      | related to cathepsin d (lysosomal aspartyl protease)                             | mp01197            |                    | sr13260                 | UHOR_03396           |                      |
| Ortholog 20 | um11910              |                      | hypothetical protein                                                             | mp01201            |                    | sr13265                 | UHOR_03402           |                      |
| Ortholog 21 | um03880              |                      | conserved hypothetical protein                                                   | mp01221            |                    | sr14776                 | UHOR_05886           |                      |
| Ortholog 22 | um03381              |                      | conserved hypothetical protein                                                   | mp01258            |                    | sr14380                 | UHOR_05247           |                      |
| Ortholog 23 | um03382              |                      | related to 3-phytase A precursor                                                 | mp01259            |                    | sr14381                 | UHOR_05245           |                      |
| Ortholog 24 | um00330              |                      | related to UTR2 - cell wall protein                                              | mp00127            |                    | sr11681                 | UHOR_00509           |                      |
| Ortholog 25 | um11187              |                      | related to ROT1 - molecular chaperone in the endoplasmic reticulum               | mp01285            |                    | sr16435                 | UHOR_08289           |                      |
| Ortholog 26 | um02758              |                      | related to Chitinase A precursor                                                 | mp01325            |                    | sr13813                 | UHOR_04393           |                      |
| Ortholog 27 | um02711              |                      | related to ADAM protease ADM-B                                                   | mp01341            |                    | sr13768                 | UHOR_04336           |                      |
| Ortholog 28 | um03924              |                      | repellent protein 1 precursor                                                    | mp01368            |                    | sr14829                 | UHOR_05948           |                      |
| Ortholog 29 | um05177              |                      | related to endosomal protein EMP70 precursor                                     | mp01379            |                    | sr13085                 | UHOR_03136           |                      |
| Ortholog 30 | um10186              |                      | putative protein                                                                 | mp00141            |                    | sr13060                 | UHOR_03101           |                      |
| Ortholog 31 | um11562              |                      | hydrophobin 2                                                                    | mp01444            |                    | sr15890                 | UHOR_07158           |                      |
| Ortholog 32 | um00309              |                      | conserved hypothetical protein                                                   | mp01489            |                    | sr11661                 | UHOR_00478           |                      |
| Ortholog 33 | um00299              |                      | conserved hypothetical protein                                                   | mp01501            |                    | sr11651                 | UHOR_00466           |                      |
| Ortholog 34 | um10091              |                      | conserved hypothetical protein                                                   | mp01504            |                    | sr11646                 | UHOR_00459           |                      |
| Ortholog 35 | um11070              |                      | probable lipase precursor                                                        | mp01523            |                    | sr14401                 | UHOR_05268           |                      |
| Ortholog 36 | um12298              |                      | conserved hypothetical protein                                                   | mp00153            |                    | sr15940                 | UHOR_07245           |                      |
| Ortholog 37 | um03947              |                      | probable carboxypeptidase 2                                                      | mp01581            |                    | sr14853                 | UHOR_05981           |                      |
| Ortholog 38 | um05604              |                      | putative protein                                                                 | mp01601            |                    | sr16292                 | UHOR_08034           |                      |
| Ortholog 39 | um11083              |                      | related to p24 protein, involved in membrane trafficking                         | mp01620            |                    | sr14476                 | UHOR_05364           |                      |
| Ortholog 40 | um11092              |                      | probable prohibitin PHB1                                                         | mp01625            |                    | sr14494                 | UHOR_05388           |                      |
| Ortholog 41 | um12233              |                      | conserved hypothetical protein                                                   | mp01628            |                    | sr14508                 | UHOR_14934           |                      |
| Ortholog 42 | um03487              |                      | putative protein                                                                 | mp01657            |                    | sr14475                 | UHOR_05362           |                      |
| Ortholog 43 | um11690              |                      | conserved hypothetical protein                                                   | mp01671            |                    | sr12661                 | UHOR_02365           |                      |
| Ortholog 44 | um01957              |                      | related to Mannosyl-oligosaccharide alpha-1,2-mannosidase precursor              | mp01689            |                    | sr10711.2               | UHOR_02907           |                      |
| Ortholog 45 | um11253              |                      | conserved hypothetical protein                                                   | mp00168            |                    | sr12139                 | UHOR_01276           |                      |

|             |         |                                                                                                    |         |           |            |
|-------------|---------|----------------------------------------------------------------------------------------------------|---------|-----------|------------|
| Ortholog 46 | um02035 | related to yellowish-green 1 (ayg1)                                                                | mp01722 | sr13253   | UHOR_03383 |
| Ortholog 47 | um05987 | conserved hypothetical protein                                                                     | mp01751 | sr16607   | UHOR_08502 |
| Ortholog 48 | um11922 | related to Chitin deacetylase precursor                                                            | mp01784 | sr13741   | UHOR_04296 |
| Ortholog 49 | um11927 | related to ROT1 - molecular chaperone in the endoplasmic reticulum                                 | mp01790 | sr13751   | UHOR_04309 |
| Ortholog 50 | um05769 | related to Dolichyl-diphosphooligosaccharide--protein glycosyltransferase 67 kDa subunit precursor | mp01848 | sr16101   | UHOR_07500 |
| Ortholog 51 | um00655 | probable Family 9 glycosyl hydrolase                                                               | mp00186 | sr11936   | UHOR_00994 |
| Ortholog 52 | um05366 | conserved hypothetical protein                                                                     | mp01906 | sr16352   | UHOR_08198 |
| Ortholog 53 | um05352 | related to MPD1 - Disulfide isomerase related protein                                              | mp01917 | sr16335   | UHOR_08174 |
| Ortholog 54 | um00013 | conserved hypothetical protein                                                                     | mp01933 | sr06437   | UHOR_00031 |
| Ortholog 55 | um00041 | putative protein                                                                                   | mp01946 | sr11371   | UHOR_00075 |
| Ortholog 56 | um00098 | related to YTP1                                                                                    | mp01971 | sr11437   | UHOR_00159 |
| Ortholog 57 | um00102 | conserved hypothetical protein                                                                     | mp01975 | sr11441   | UHOR_00164 |
| Ortholog 58 | um00144 | putative protein                                                                                   | mp01993 | sr11488   | UHOR_00224 |
| Ortholog 59 | um00235 | probable EXG1 - exo-beta-1,3-glucanase (I/II), major isoform                                       | mp02050 | sr11587   | UHOR_00370 |
| Ortholog 60 | um00159 | conserved hypothetical protein                                                                     | mp02087 | sr11505   | UHOR_00257 |
| Ortholog 61 | um10030 | putative protein                                                                                   | mp02101 | sr11472   | UHOR_00204 |
| Ortholog 62 | um10024 | conserved hypothetical protein                                                                     | mp02112 | sr11447   | UHOR_00170 |
| Ortholog 63 | um00105 | iron transport multicopper oxidase                                                                 | mp02113 | sr11445   | UHOR_00168 |
| Ortholog 64 | um00104 | hypothetical protein                                                                               | mp02114 | sr11444   | UHOR_00167 |
| Ortholog 65 | um00081 | putative protein                                                                                   | mp02123 | sr11416   | UHOR_00131 |
| Ortholog 66 | um00064 | related to pepsin precursor (aspartate protease)                                                   | mp02133 | sr11394   | UHOR_00110 |
| Ortholog 67 | um00054 | putative protein                                                                                   | mp02139 | sr11385   | UHOR_00093 |
| Ortholog 68 | um02865 | conserved hypothetical protein                                                                     | mp02217 | sr13917   | UHOR_04516 |
| Ortholog 69 | um03024 | related to subtilisin-like serine protease                                                         | mp02285 | sr14076   | UHOR_04747 |
| Ortholog 70 | um03023 | related to Ribonuclease Trv                                                                        | mp02286 | sr14075   | UHOR_04748 |
| Ortholog 71 | um05988 | conserved hypothetical protein                                                                     | mp02301 | sr16608   | UHOR_08503 |
| Ortholog 72 | um05995 | related to Acid phosphatase precursor                                                              | mp02365 | sr16616   | UHOR_08513 |
| Ortholog 73 | um01855 | conserved hypothetical protein                                                                     | mp02372 | sr10555   | UHOR_02752 |
| Ortholog 74 | um01854 | conserved hypothetical protein                                                                     | mp02373 | sr10554   | UHOR_02751 |
| Ortholog 75 | um03640 | conserved hypothetical protein                                                                     | mp02388 | sr14587   | UHOR_05576 |
| Ortholog 76 | um06434 | conserved hypothetical protein                                                                     | mp02446 | sr16876   | UHOR_08985 |
| Ortholog 77 | um11765 | related to 6-hydroxy-D-nicotine oxidase                                                            | mp02522 | sr00094.2 | UHOR_06723 |
| Ortholog 78 | um11940 | putative protein                                                                                   | mp02557 | sr17138   | UHOR_12242 |
| Ortholog 79 | um00538 | conserved hypothetical protein                                                                     | mp02666 | sr11817   | UHOR_00823 |
| Ortholog 80 | um04733 | related to phosphatidylglycerol/phosphatidylinositol transfer protein                              | mp02723 | sr15608   | UHOR_07579 |
| Ortholog 81 | um04807 | conserved hypothetical protein                                                                     | mp02765 | sr15680   | UHOR_07680 |
| Ortholog 82 | um06162 | conserved hypothetical protein                                                                     | mp02810 | sr11273   | UHOR_08738 |
| Ortholog 83 | um06190 | related to Chitinase                                                                               | mp02819 | sr11305   | UHOR_08772 |
| Ortholog 84 | um06218 | conserved hypothetical protein                                                                     | mp02844 | sr11346   | UHOR_08814 |
| Ortholog 85 | um06158 | probable glutaminase A                                                                             | mp02871 | sr11265   | UHOR_08730 |
| Ortholog 86 | um10861 | related to Reticuline oxidase precursor                                                            | mp02891 | sr16576   | UHOR_08462 |
| Ortholog 87 | um02381 | conserved hypothetical protein                                                                     | mp02948 | sr13587   | UHOR_03898 |
| Ortholog 88 | um02430 | conserved hypothetical protein                                                                     | mp02959 | sr10848   | UHOR_03994 |
| Ortholog 89 | um10280 | related to vacuolar ATP synthase subunit H                                                         | mp00295 | sr13633   | UHOR_04146 |
| Ortholog 90 | um10156 | probable proteine disulfate isomerase                                                              | mp02991 | sr10870   | UHOR_03972 |
| Ortholog 91 | um04531 | conserved hypothetical protein                                                                     | mp03055 | sr15415   | UHOR_06515 |
| Ortholog 92 | um04926 | probable PEP4 - aspartyl protease                                                                  | mp00310 | sr15804   | UHOR_07037 |
| Ortholog 93 | um01377 | hypothetical protein                                                                               | mp03205 | sr10532   | UHOR_02067 |

|              |           |                                                                                       |         |           |            |
|--------------|-----------|---------------------------------------------------------------------------------------|---------|-----------|------------|
| Ortholog 94  | um02293   | hypothetical protein                                                                  | mp03254 | sr13490   | UHOR_03765 |
| Ortholog 95  | um11403   | conserved hypothetical protein                                                        | mp03275 | sr13484   | UHOR_03756 |
| Ortholog 96  | um01937   | related to acid sphingomyelinase                                                      | mp03306 | sr10683   | UHOR_02879 |
| Ortholog 97  | um01987   | hypothetical protein                                                                  | mp03314 | sr12947   | UHOR_02965 |
| Ortholog 98  | um01976   | putative protein                                                                      | mp03321 | sr12936   | UHOR_02931 |
| Ortholog 99  | um01977   | hypothetical protein                                                                  | mp03322 | sr12937   | UHOR_02933 |
| Ortholog 100 | um01940   | conserved hypothetical protein                                                        | mp03327 | sr10687   | UHOR_02882 |
| Ortholog 101 | um01945   | probable SUC2 - invertase (sucrose hydrolyzing enzyme)                                | mp03330 | sr10702   | UHOR_02888 |
| Ortholog 102 | um00395   | probable Rds1 protein                                                                 | mp00333 | sr11754   | UHOR_00616 |
| Ortholog 103 | um06120   | conserved hypothetical protein                                                        | mp03406 | sr16757   | UHOR_08685 |
| Ortholog 104 | um06118   | related to Tripeptidyl-peptidase I precursor                                          | mp03407 | sr16762   | UHOR_08684 |
| Ortholog 105 | um06112   | hypothetical protein                                                                  | mp03409 | sr16735   | UHOR_08673 |
| Ortholog 106 | um06098   | related to extracellular elastolytic metalloproteinase precursor                      | mp03419 | sr16721   | UHOR_08654 |
| Ortholog 107 | um04630   | related to MUS81 - endonuclease involved in DNA repair and replication fork stability | mp03458 | sr15514   | UHOR_06657 |
| Ortholog 108 | um04641.2 | related to PRC1 - carboxypeptidase y, serine-type protease                            | mp03464 | sr15529   | UHOR_06682 |
| Ortholog 109 | um00688   | related to bacterial leucyl aminopeptidase precursor                                  | mp03503 | sr11975   | UHOR_01059 |
| Ortholog 110 | um00695   | putative exochitinase                                                                 | mp03509 | sr11983   | UHOR_01069 |
| Ortholog 111 | um00715   | hypothetical protein                                                                  | mp03519 | sr12002   | UHOR_01096 |
| Ortholog 112 | um15020   | conserved hypothetical protein                                                        | mp03529 | sr12023   | UHOR_01125 |
| Ortholog 113 | um00723   | related to stress response protein rds1p                                              | mp03546 | sr12012   | UHOR_01109 |
| Ortholog 114 | um00692   | conserved hypothetical protein                                                        | mp03561 | sr11979   | UHOR_01064 |
| Ortholog 115 | um05861   | related to FET5 - multicopper oxidase                                                 | mp03586 | sr16482   | UHOR_15041 |
| Ortholog 116 | um12101   | conserved hypothetical protein                                                        | mp03617 | sr13436   | UHOR_03691 |
| Ortholog 117 | um02243   | hypothetical protein                                                                  | mp03618 | sr13439   | UHOR_03695 |
| Ortholog 118 | um01632   | conserved hypothetical protein                                                        | mp03725 | sr12700   | UHOR_02419 |
| Ortholog 119 | um11886   | conserved hypothetical protein                                                        | mp03739 | sr12697   | UHOR_02413 |
| Ortholog 120 | um12205   | hypothetical protein                                                                  | mp03793 | sr14091   | UHOR_04758 |
| Ortholog 121 | um00904   | related to glucose regulated stress protein, HSP70-like                               | mp03820 | sr12201   | UHOR_01361 |
| Ortholog 122 | um00882   | related to PPN1 - vacuolar endopolyphosphatase                                        | mp03838 | sr12175   | UHOR_01332 |
| Ortholog 123 | um05731   | conserved hypothetical protein                                                        | mp03850 | sr16064   | UHOR_07433 |
| Ortholog 124 | um11554   | related to Glucose oxidase                                                            | mp03898 | sr15838   | UHOR_07094 |
| Ortholog 125 | um02611   | related to ribonuclease M                                                             | mp03915 | sr13650   | UHOR_04170 |
| Ortholog 126 | um02620   | conserved hypothetical protein                                                        | mp03930 | sr13680   | UHOR_04212 |
| Ortholog 127 | um02640   | conserved hypothetical protein                                                        | mp03932 | sr13685   | UHOR_04217 |
| Ortholog 128 | um01295   | hypothetical protein                                                                  | mp03959 | sr10427.2 | UHOR_01941 |
| Ortholog 129 | um10676   | conserved hypothetical protein                                                        | mp00396 | sr15597   | UHOR_07566 |
| Ortholog 130 | um01289   | related to AXL2 - required for axial pattern of budding                               | mp03985 | sr10416   | UHOR_01935 |
| Ortholog 131 | um05528   | conserved hypothetical protein                                                        | mp03997 | sr16207   | UHOR_07931 |
| Ortholog 132 | um05539   | conserved hypothetical protein                                                        | mp04010 | sr16221   | UHOR_07912 |
| Ortholog 133 | um05708   | conserved hypothetical protein                                                        | mp04041 | sr16040   | UHOR_07386 |
| Ortholog 134 | um05704   | conserved hypothetical protein                                                        | mp04048 | sr16037   | UHOR_07381 |
| Ortholog 135 | um01734   | hypothetical protein                                                                  | mp04084 | sr12809   | UHOR_02584 |
| Ortholog 136 | um01774   | conserved hypothetical protein                                                        | mp04107 | sr12852   | UHOR_02638 |
| Ortholog 137 | um01788   | related to deacetylase                                                                | mp04115 | sr12866   | UHOR_02660 |
| Ortholog 138 | um01802   | probable protein disulfide-isomerase precursor                                        | mp04122 | sr12879   | UHOR_02676 |
| Ortholog 139 | um01808   | related to ERV2 - Flavin dependent sulfhydryl oxidase                                 | mp04127 | sr12885   | UHOR_02684 |
| Ortholog 140 | um15089   | conserved hypothetical protein                                                        | mp04132 | sr12886   | UHOR_02686 |
| Ortholog 141 | um01772   | related to Aldose 1-epimerase precursor                                               | mp04147 | sr12850   | UHOR_02636 |



|              |           |                                                                                                                       |         |         |            |
|--------------|-----------|-----------------------------------------------------------------------------------------------------------------------|---------|---------|------------|
| Ortholog 142 | um01725   | conserved hypothetical protein                                                                                        | mp04172 | sr12800 | UHOR_02571 |
| Ortholog 143 | um01705   | conserved hypothetical protein                                                                                        | mp04177 | sr12778 | UHOR_02535 |
| Ortholog 144 | um01700   | related to ABC transporter protein                                                                                    | mp04180 | sr12772 | UHOR_02527 |
| Ortholog 145 | um01898   | related to endo-1,3(4)-beta-glucanase                                                                                 | mp04202 | sr10624 | UHOR_02820 |
| Ortholog 146 | um01888   | probable serine-type carboxypeptidase f precursor                                                                     | mp04217 | sr10607 | UHOR_02799 |
| Ortholog 147 | um01886   | related to carboxypeptidase                                                                                           | mp04220 | sr10606 | UHOR_02798 |
| Ortholog 148 | um01871   | conserved hypothetical protein                                                                                        | mp04223 | sr10586 | UHOR_02775 |
| Ortholog 149 | um06332   | endoglucanase I precursor (egl1)                                                                                      | mp04237 | sr13229 | UHOR_03357 |
| Ortholog 150 | um10724   | probable MRPL19 - mitochondrial ribosomal protein, large subunit                                                      | mp04285 | sr16007 | UHOR_07301 |
| Ortholog 151 | um05641   | related to palmitoyl-protein thioesterase 1                                                                           | mp04292 | sr15952 | UHOR_07260 |
| Ortholog 152 | um12007   | related to cellulase                                                                                                  | mp04322 | sr15758 | UHOR_07788 |
| Ortholog 153 | um06255   | hypothetical protein                                                                                                  | mp04373 | sr16785 | UHOR_08869 |
| Ortholog 154 | um10975.2 | conserved hypothetical protein                                                                                        | mp04386 | sr16780 | UHOR_08862 |
| Ortholog 155 | um10972   | hypothetical protein                                                                                                  | mp04389 | sr16775 | UHOR_08856 |
| Ortholog 156 | um05227   | hypothetical protein                                                                                                  | mp04435 | sr13136 | UHOR_03212 |
| Ortholog 157 | um05223.2 | related to beta-1,6-glucanase precursor                                                                               | mp04456 | sr13131 | UHOR_03204 |
| Ortholog 158 | um05222   | putative protein                                                                                                      | mp04457 | sr13130 | UHOR_03203 |
| Ortholog 159 | um05217   | conserved hypothetical protein                                                                                        | mp04460 | sr13125 | UHOR_03198 |
| Ortholog 160 | um10474.2 | conserved hypothetical protein                                                                                        | mp04469 | sr14607 | UHOR_05606 |
| Ortholog 161 | um10484   | related to ALG7 - UDP-N-acetylglucosamine-1-phosphate transferase                                                     | mp04479 | sr14627 | UHOR_05631 |
| Ortholog 162 | um03860   | related to pepsinogen precursor                                                                                       | mp04515 | sr14762 | UHOR_05865 |
| Ortholog 163 | um03344   | conserved hypothetical protein                                                                                        | mp04572 | sr14342 | UHOR_05194 |
| Ortholog 164 | um03355   | related to ERV25 - component of the COPII-coated vesicles                                                             | mp04575 | sr14358 | UHOR_05209 |
| Ortholog 165 | um03352   | conserved hypothetical protein                                                                                        | mp04578 | sr14351 | UHOR_05206 |
| Ortholog 166 | um03349   | conserved hypothetical protein                                                                                        | mp04579 | sr14347 | UHOR_05202 |
| Ortholog 167 | um10823   | conserved hypothetical protein                                                                                        | mp04614 | sr14269 | UHOR_05093 |
| Ortholog 168 | um01820   | hypothetical protein                                                                                                  | mp04620 | sr12897 | UHOR_02700 |
| Ortholog 169 | um01851   | conserved hypothetical protein                                                                                        | mp04640 | sr12933 | UHOR_02748 |
| Ortholog 170 | um01829   | related to alpha-L-arabinofuranosidase I precursor                                                                    | mp04651 | sr12911 | UHOR_02718 |
| Ortholog 171 | um01823   | hypothetical protein                                                                                                  | mp04653 | sr12902 | UHOR_02707 |
| Ortholog 172 | um06370   | conserved hypothetical protein                                                                                        | mp04694 | sr16813 | UHOR_08900 |
| Ortholog 173 | um01970   | hypothetical protein                                                                                                  | mp01073 | sr10728 | UHOR_02926 |
| Ortholog 174 | um03822   | putative protein                                                                                                      | mp04746 | sr14724 | UHOR_05809 |
| Ortholog 175 | um03818   | conserved hypothetical protein                                                                                        | mp04748 | sr14720 | UHOR_05801 |
| Ortholog 176 | um03812   | probable NHX1 - Na <sup>+</sup> /H <sup>+</sup> exchanger of the prevacuolar compartment - involved in salt tolerance | mp04750 | sr14714 | UHOR_05791 |
| Ortholog 177 | um03807   | conserved hypothetical protein                                                                                        | mp04751 | sr14709 | UHOR_05785 |
| Ortholog 178 | um10756   | conserved hypothetical protein                                                                                        | mp04771 | sr16171 | UHOR_07876 |
| Ortholog 179 | um04248   | putative protein                                                                                                      | mp04785 | sr15138 | UHOR_06378 |
| Ortholog 180 | um01213   | conserved hypothetical protein                                                                                        | mp04820 | sr10289 | UHOR_01836 |
| Ortholog 181 | um04433   | hydrophobin 3                                                                                                         | mp04854 | sr15320 | UHOR_06926 |
| Ortholog 182 | um12123   | related to Nuclease Le3                                                                                               | mp00485 | sr12271 | UHOR_01473 |
| Ortholog 183 | um04171   | related to ROT1 - molecular chaperone in the endoplasmic reticulum                                                    | mp04882 | sr15050 | UHOR_06248 |
| Ortholog 184 | um05036   | related to endo-1,3(4)-beta-glucanase                                                                                 | mp04902 | sr15917 | UHOR_07211 |
| Ortholog 185 | um04354   | conserved hypothetical protein                                                                                        | mp04926 | sr15240 | UHOR_06805 |
| Ortholog 186 | um04355   | related to Sel-1 homolog precursor                                                                                    | mp04927 | sr15241 | UHOR_06806 |
| Ortholog 187 | um04368   | related to endo-1,3(4)-beta-glucanase                                                                                 | mp04934 | sr15253 | UHOR_06828 |
| Ortholog 188 | um04383   | related to ERP2 - p24 protein involved in membrane trafficking                                                        | mp04942 | sr15269 | UHOR_06847 |
| Ortholog 189 | um04400   | probable PRB1 - protease B, vacuolar                                                                                  | mp04947 | sr15288 | UHOR_06878 |

|              |           |                                                                            |         |         |            |
|--------------|-----------|----------------------------------------------------------------------------|---------|---------|------------|
| Ortholog 190 | um00961   | conserved hypothetical protein                                             | mp00494 | sr12257 | UHOR_01439 |
| Ortholog 191 | um04405   | alpha-glucosidase II precursor                                             | mp04958 | sr15293 | UHOR_06883 |
| Ortholog 192 | um04342   | putative protein                                                           | mp04988 | sr15229 | UHOR_06791 |
| Ortholog 193 | um10811   | related to ARL1 - ADP-ribosylation factor                                  | mp05081 | sr12614 | UHOR_02287 |
| Ortholog 194 | um02178   | related to aspartic protease                                               | mp05135 | sr10744 | UHOR_03590 |
| Ortholog 195 | um02204   | related to beta-galactosidase                                              | mp05149 | sr10781 | UHOR_03626 |
| Ortholog 196 | um10067   | hypothetical protein                                                       | mp05162 | sr10759 | UHOR_03606 |
| Ortholog 197 | um02843   | probable KEX2 - endoproteinase of late golgi compartment                   | mp05221 | sr13888 | UHOR_04482 |
| Ortholog 198 | um04994   | related to WBP1 - oligosaccharyl transferase beta subunit precursor        | mp05249 | sr15876 | UHOR_07147 |
| Ortholog 199 | um04318   | related to Prenylcysteine oxidase precursor                                | mp05292 | sr15204 | UHOR_06756 |
| Ortholog 200 | um01512   | related to UDP-glucose:glycoprotein glucosyltransferase precursor          | mp05349 | sr12581 | UHOR_02240 |
| Ortholog 201 | um01495   | related to YIA6 - Pvruvate transporter of the mitochondrial inner membrane | mp05360 | sr12548 | UHOR_02218 |
| Ortholog 202 | um02356   | related to beta-galactosidase precursor                                    | mp05403 | sr13559 | UHOR_03846 |
| Ortholog 203 | um00598   | conserved hypothetical protein                                             | mp05426 | sr11876 | UHOR_00930 |
| Ortholog 204 | um00567   | related to B2-aldehyde-forming enzyme                                      | mp05443 | sr11845 | UHOR_00872 |
| Ortholog 205 | um12184   | conserved hypothetical protein                                             | mp00550 | sr13456 | UHOR_03722 |
| Ortholog 206 | um01018   | probable cyclophilin b                                                     | mp05516 | sr12318 | UHOR_01544 |
| Ortholog 207 | um01014   | conserved hypothetical protein                                             | mp05536 | sr12321 | UHOR_01539 |
| Ortholog 208 | um12045   | related to alpha glucosidase II beta subunit                               | mp05546 | sr16880 | UHOR_08992 |
| Ortholog 209 | um05109   | related to ECM14 - involved in cell wall biogenesis and architecture       | mp05573 | sr13012 | UHOR_03039 |
| Ortholog 210 | um05173   | related to DnaJ homolog subfamily C member 3                               | mp00055 | sr13081 | UHOR_03131 |
| Ortholog 211 | um06071   | related to Para-nitrobenzyl esterase                                       | mp05606 | sr16698 | UHOR_08619 |
| Ortholog 212 | um06075   | related to beta-glucosidase                                                | mp05607 | sr16700 | UHOR_08622 |
| Ortholog 213 | um02134   | related to mixed-linked glucanase precursor MLG1                           | mp05657 | sr13360 | UHOR_03533 |
| Ortholog 214 | um10055   | related to gamma-glutamyltransferase                                       | mp05677 | sr13345 | UHOR_03512 |
| Ortholog 215 | um02111   | related to triacylglycerol lipase precursor                                | mp05680 | sr13333 | UHOR_03500 |
| Ortholog 216 | um04259   | conserved hypothetical protein                                             | mp05759 | sr15151 | UHOR_06392 |
| Ortholog 217 | um10424.2 | related to PTM1 - member of the major facilitator superfamily              | mp05763 | sr15160 | UHOR_06403 |
| Ortholog 218 | um03449   | septin 3                                                                   | mp00577 | sr14440 | UHOR_05319 |
| Ortholog 219 | um11266   | probable lysophospholipase (lpl)                                           | mp05800 | sr12339 | UHOR_01564 |
| Ortholog 220 | um01695   | hypothetical protein                                                       | mp05871 | sr12767 | UHOR_02518 |
| Ortholog 221 | um02006   | conserved hypothetical protein                                             | mp05885 | sr12968 | UHOR_02981 |
| Ortholog 222 | um02021   | conserved hypothetical protein                                             | mp05895 | sr12983 | UHOR_03005 |
| Ortholog 223 | um02019   | probable Chitin deacetylase                                                | mp05896 | sr12981 | UHOR_03000 |
| Ortholog 224 | um02011   | putative protein                                                           | mp05899 | sr12972 | UHOR_02986 |
| Ortholog 225 | um11062   | hypothetical protein                                                       | mp05944 | sr14948 | UHOR_06104 |
| Ortholog 226 | um04044   | related to Glucose oxidase                                                 | mp05980 | sr14951 | UHOR_06109 |
| Ortholog 227 | um11627   | conserved hypothetical protein                                             | mp06037 | sr12097 | UHOR_01220 |
| Ortholog 228 | um04145   | conserved hypothetical Ustilago-specific protein                           | mp06133 | sr14084 | UHOR_04742 |
| Ortholog 229 | um10536   | related to FPR2 - FK506/rapamycin-binding protein of the ER                | mp06196 | sr15342 | UHOR_06956 |
| Ortholog 230 | um05774   | related to metalloprotease MEP1                                            | mp00626 | sr16106 | UHOR_07510 |
| Ortholog 231 | um05781.2 | hypothetical protein                                                       | mp00630 | sr16113 | UHOR_07519 |
| Ortholog 232 | um02560   | related to EMP24 protein precursor                                         | mp06347 | sr11038 | UHOR_04099 |
| Ortholog 233 | um05780   | hypothetical protein                                                       | mp00642 | sr16112 | UHOR_07521 |
| Ortholog 234 | um01143   | related to chitin deacetylase precursor                                    | mp00716 | sr12442 | UHOR_01725 |
| Ortholog 235 | um01082   | putative protein                                                           | mp00747 | sr12380 | UHOR_01635 |
| Ortholog 236 | um03246   | related to versicolorin b synthase                                         | mp00777 | sr14242 | UHOR_05050 |
| Ortholog 237 | um10649   | conserved hypothetical protein                                             | mp00784 | sr14231 | UHOR_05039 |

|              |           |                                                                                          |         |           |            |
|--------------|-----------|------------------------------------------------------------------------------------------|---------|-----------|------------|
| Ortholog 238 | um04282   | related to 3-phytase A precursor                                                         | mp00078 | sr15174   | UHOR_06430 |
| Ortholog 239 | um05733   | conserved hypothetical protein                                                           | mp00843 | sr16066   | UHOR_02041 |
| Ortholog 240 | um12313   | conserved hypothetical protein                                                           | mp00849 | sr16075   | UHOR_07445 |
| Ortholog 241 | um10565   | hypothetical protein                                                                     | mp00857 | sr12163   | UHOR_01315 |
| Ortholog 242 | um00876   | related to SPR1 - exo-1,3-beta-glucanase precursor                                       | mp00859 | sr12165   | UHOR_01319 |
| Ortholog 243 | um11839.2 | hypothetical protein                                                                     | mp00862 | sr12171   | UHOR_01328 |
| Ortholog 244 | um03615   | related to Glucose oxidase                                                               | mp00910 | sr11165   | UHOR_05546 |
| Ortholog 245 | um03574   | putative protein                                                                         | mp00929 | sr14569   | UHOR_05488 |
| Ortholog 246 | um03614   | conserved hypothetical protein                                                           | mp00948 | sr11163.2 | UHOR_05545 |
| Ortholog 247 | um03551   | related to Glucose oxidase                                                               | mp00974 | sr14544   | UHOR_05461 |
| Ortholog 248 | um01204   | related to PRY1 - strong similarity to the plant PR-1 class of pathogen related proteins | mp04826 | sr10279   | UHOR_01820 |

**Supplementary Table 9.** Data information: Data sources of genomic, protein sequences and other information used in the analysis.

| <b>Species</b>               | <b>Upload date</b> | <b>Source</b>                                                                                                                     | <b>Reference</b>          |
|------------------------------|--------------------|-----------------------------------------------------------------------------------------------------------------------------------|---------------------------|
| <i>Ustilago maydis</i>       | Sept, 2011         | <a href="ftp://ftpmips.gsf.de/ustilago/">ftp://ftpmips.gsf.de/ustilago/</a>                                                       | (Kämper, et al. 2006)     |
| <i>Sporisorium reilianum</i> | Feb, 2011          | <a href="ftp://ftpmips.gsf.de/fungi/Sporisorium_reilianum/">ftp://ftpmips.gsf.de/fungi/Sporisorium_reilianum/</a>                 | (Schirawski, et al. 2010) |
| <i>Ustilago hordei</i>       | June, 2011         | <a href="ftp://ftpmips.gsf.de/MUHDB/">ftp://ftpmips.gsf.de/MUHDB/</a>                                                             | (Laurie, et al. 2012)     |
| <i>Malassezia globosa</i>    | Not mentioned      | <a href="http://genome.jgi.doe.gov/Malg11/Malg11.download.ftp.html">http://genome.jgi.doe.gov/Malg11/Malg11.download.ftp.html</a> | (Xu, et al. 2007)         |
